# Supplementary material
Source: PubMed Central journal article supplement (PMC8102636)
Supplement: 41467_2021_22945_MOESM1_ESM.pdf [file 41467_2021_22945_MOESM1_ESM.pdf]

Supplementary Information for

## On-Demand Synthesis of Phosphoramidites

Alexander F. Sandahl, Thuy J. D. Nguyen, Rikke A. Hansen, Martin B. Johansen, Troels Skrydstrup, Kurt V. Gothelf

Correspondence to: [kvg@chem.au.dk](mailto:kvg@chem.au.dk)

## Table of Contents

|                                                                            |     |
|----------------------------------------------------------------------------|-----|
| Supplementary Methods                                                      | 3   |
| Data Availability                                                          | 3   |
| Solution Phase Reference Results                                           | 4   |
| Synthesis of Heterocycles                                                  | 10  |
| Functionalization of Resins                                                | 11  |
| Modification of NMR Tube                                                   | 13  |
| Loading Studies                                                            | 14  |
| Hygroscopicity Studies                                                     | 20  |
| Overlay of Reference Spectra for $^{19}\text{F}$ NMR Analysis              | 25  |
| Base Screen                                                                | 26  |
| $^{31}\text{P}$ NMR Study of Aminopyridine Intermediates                   | 33  |
| Flow System Setup                                                          | 35  |
| PCI Stability                                                              | 37  |
| Diffusion Study                                                            | 38  |
| Concentration Screen of 9AJ                                                | 39  |
| Synthesis of Starting Material Alcohols                                    | 40  |
| Residence Time Study                                                       | 47  |
| Stability of Phosphoramidite <b>9-P</b> in Solution                        | 58  |
| Synthesis and Characterization of Reference Oligonucleotides               | 60  |
| Single Coupling Reactions                                                  | 64  |
| Oligonucleotide Synthesis                                                  | 79  |
| Synthesis of Reference Phosphoramidites                                    | 80  |
| NMR Spectra of P(III)-loaded Resins                                        | 85  |
| NMR Spectra of Synthesized Starting Materials and Reference Products       | 90  |
| NMR Spectra of 9AJ and 2-cyanoethyl <i>N,N</i> -diisopropylphosphoramidate | 112 |
| NMR Spectra (Full) of Flowthrough (Stacked with References)                | 114 |
| Supplementary References and Notes                                         | 128 |

## Supplementary Methods

All chemicals were purchased from Sigma-Aldrich, Carbosynth, and Link Technologies Ltd. in Scotland and used without further purification. Solvents were of HPLC grade and anhydrous solvents were purchased in Sure/Seal bottles with inert atmosphere or dried prior use by an M-BRAUN solvent purification system. Yields refer to mass of isolated compounds unless otherwise stated. Reactions were monitored by thin-layer chromatography (TLC) on Merck silica 60 F254 plates and visualised by exposure to UV (254 nm) or by staining with solutions of molybdic acid, potassium permanganate, ninhydrin, vanillin, or *p*-anisaldehyde. Flash column chromatography was performed using Merck silica gel 60 (230-400 mesh) as stationary phase. NMR spectra were recorded on a Bruker BioSpin GmbH Ascend™ 400 and were calibrated using deuterated solvents (MeCN, DMSO, Chloroform). <sup>1</sup>H NMR was recorded at 400 MHz, <sup>13</sup>C NMR was recorded at 101 MHz, <sup>19</sup>F NMR was recorded at 376 MHz and <sup>31</sup>P NMR was recorded at 162 MHz. Chemical shifts are reported in parts per million and following abbreviations were used to explain multiplicities: s = singlet, d = doublet, t = triplet, q = quartet, m = multiplet. Coupling constants are reported in Hz. HRMS was performed using electrospray ionization on a Bruker Daltonics MicrOTOF.

Oligonucleotides were synthesised in house on a BioAutomation MerMade-12 automated oligonucleotide synthesiser using reagents and preloaded 1000 Å CPG columns purchased from Link Technologies Ltd. in Scotland. Phosphoramidites were synthesised in house or purchased from Link Technologies Ltd. in Scotland. Oligonucleotide synthesis was carried out under standard conditions unless otherwise states. Synthesised oligonucleotides were cleaved from solid support using AMA (1:1 40% methylamine/30-33% ammonium hydroxide). The mass was confirmed by UHPLC-ESI-TOF on a Shimadzu LCMS-2020 system. All oligonucleotides were HPLC purified on a Hewlett-Packard Agilent Expand C-18 stationary column using the following methods (Solvent A: 0.1 M Triethylammonium acetate, pH = 7; Solvent B: MeCN; Gradient: 5% to 20% B over 15 mins, 20% to 70% B 15-20 mins or 5% to 15% B over 15 mins, 15% to 70% B 15-20 mins).

## Solution Phase Reference Spectra

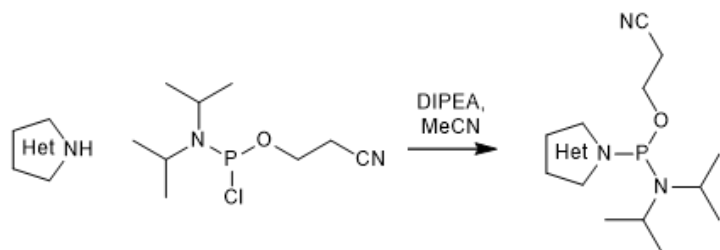

General procedure:

Heterocycles (0.10 M, 0.10 mmol) were dissolved in MeCN (1.0 mL) and DIPEA (0.030 M, 0.030 mmol) was added along with PCl (0.020 M, 0.020 mmol). NMR spectra were recorded after 10 mins.



# Imidazole

$^{31}\text{P}$  NMR (162 MHz, MeCN)  $\delta_{\text{P}}$  (ppm) 124.6

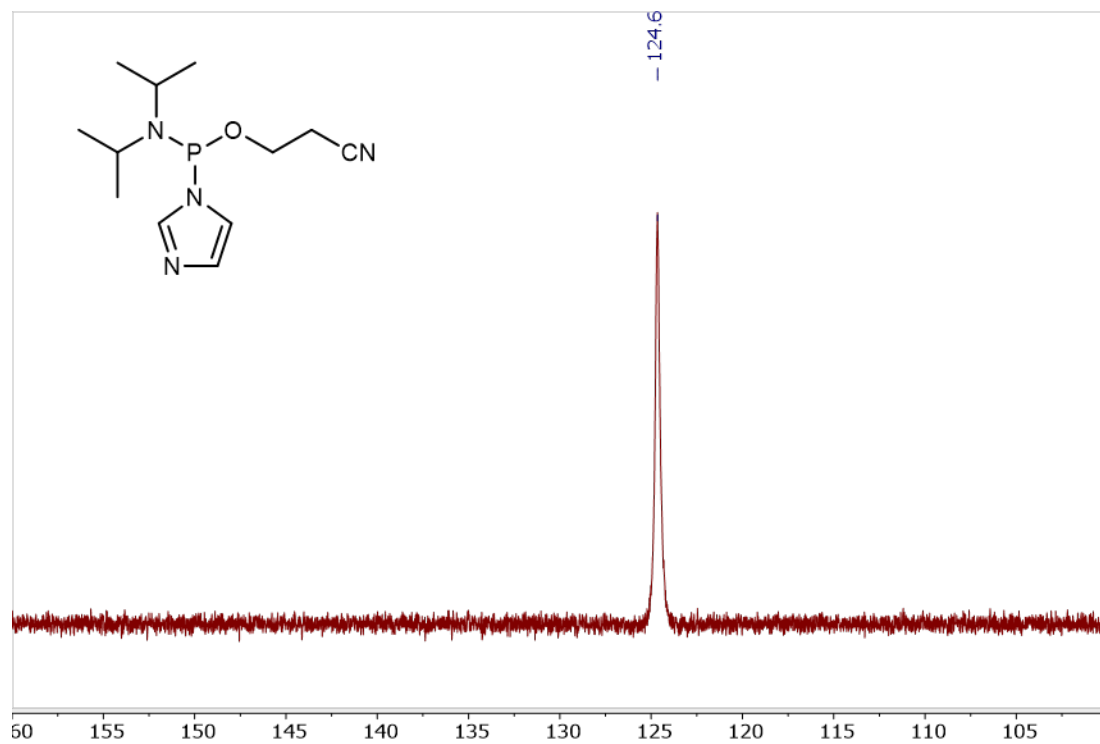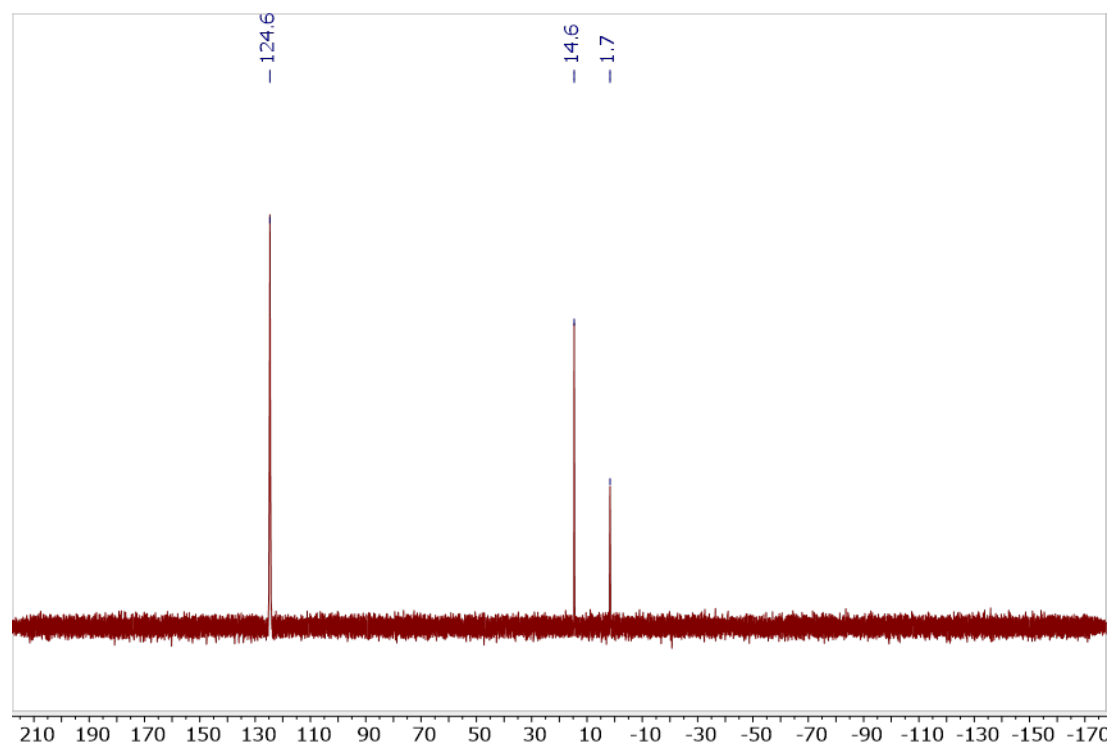

# 1,2,4-Triazole

$^{31}\text{P}$  NMR (162 MHz, MeCN)  $\delta_{\text{P}}$  (ppm) 126.9

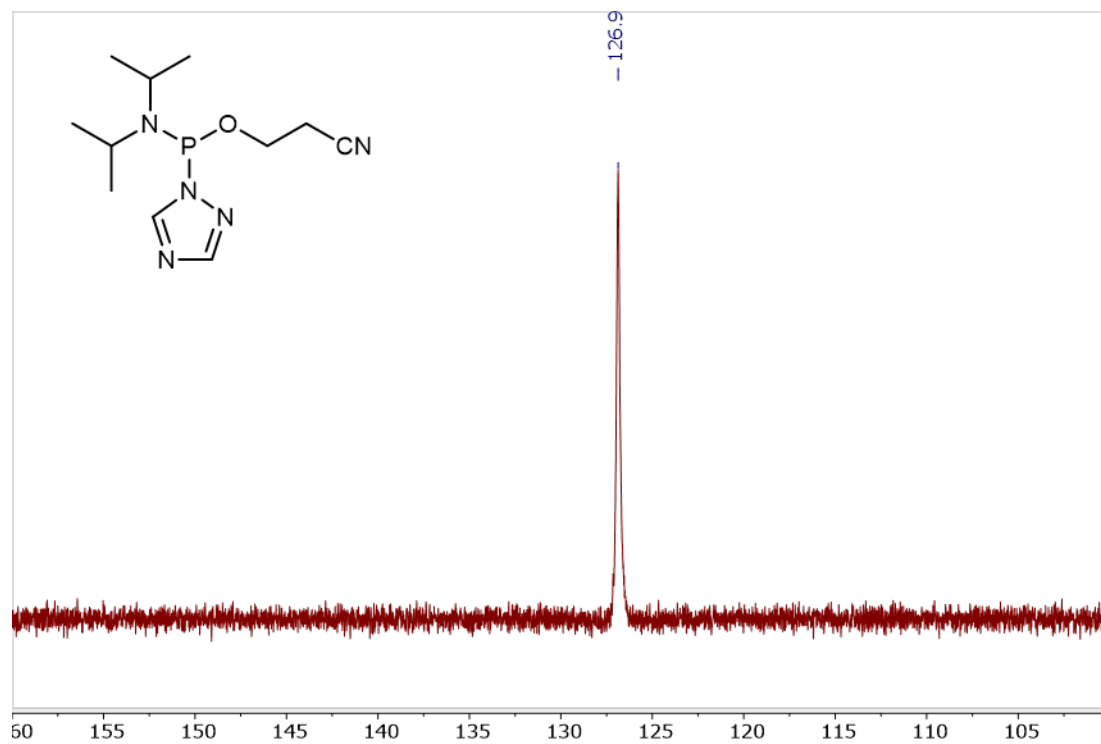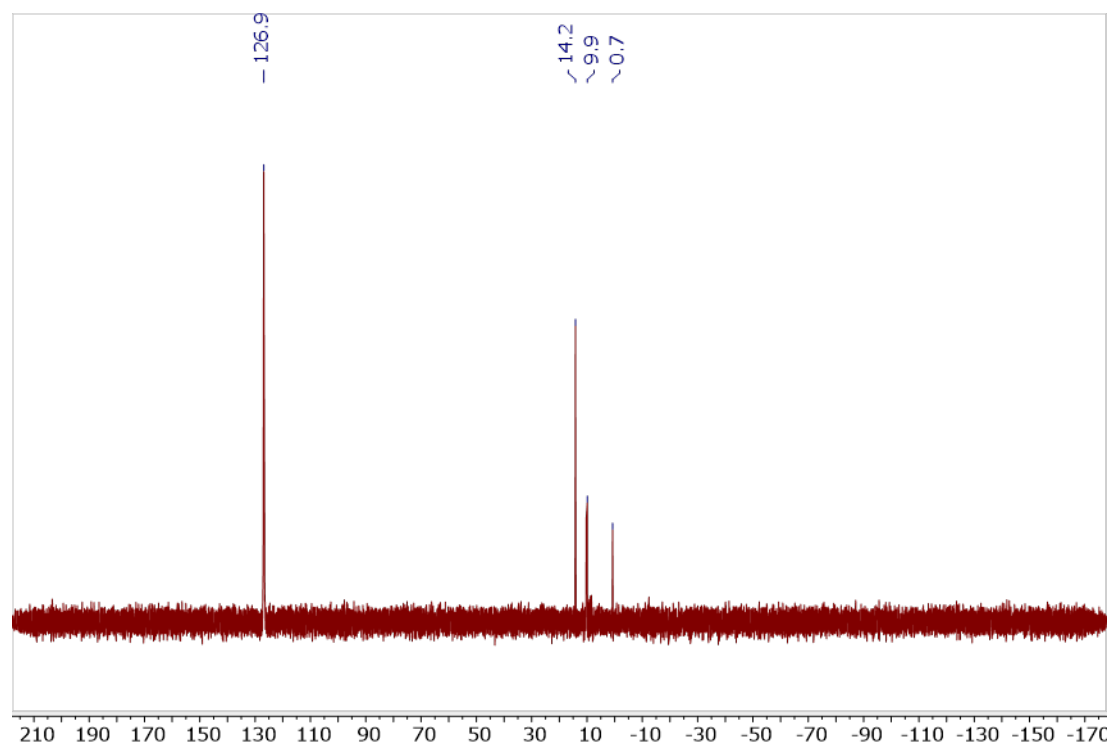

# 1,2,3-Triazole

$^{31}\text{P}$  NMR (162 MHz, MeCN)  $\delta_{\text{P}}$  (ppm) 130.6

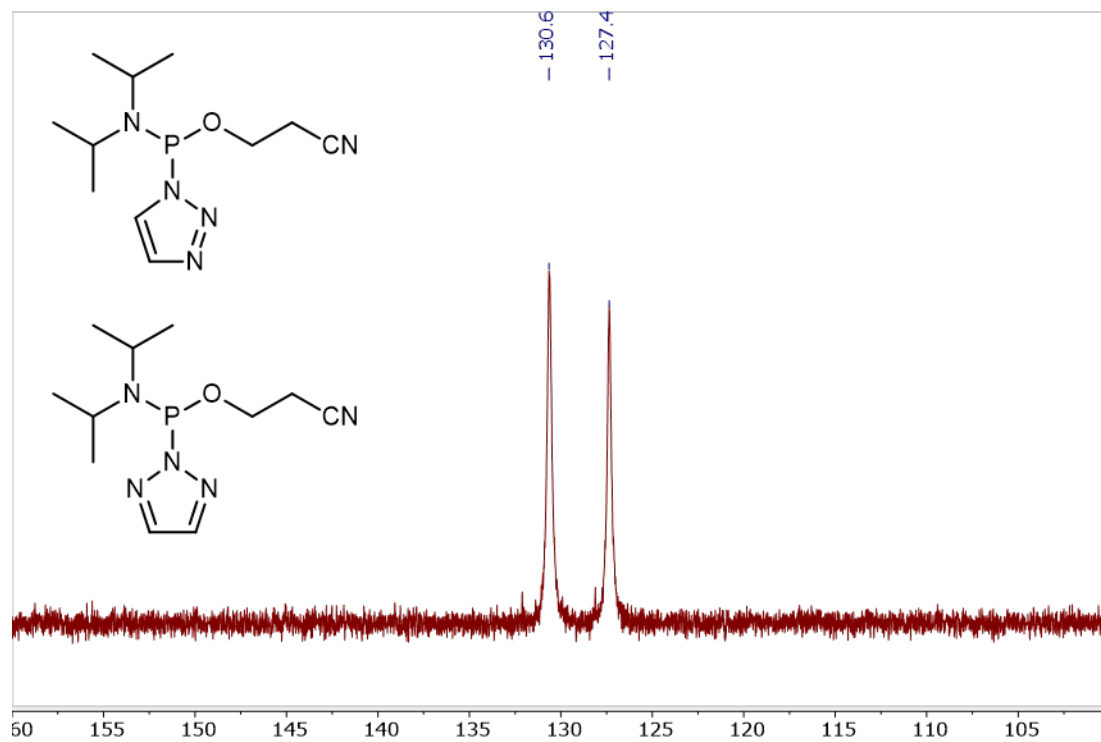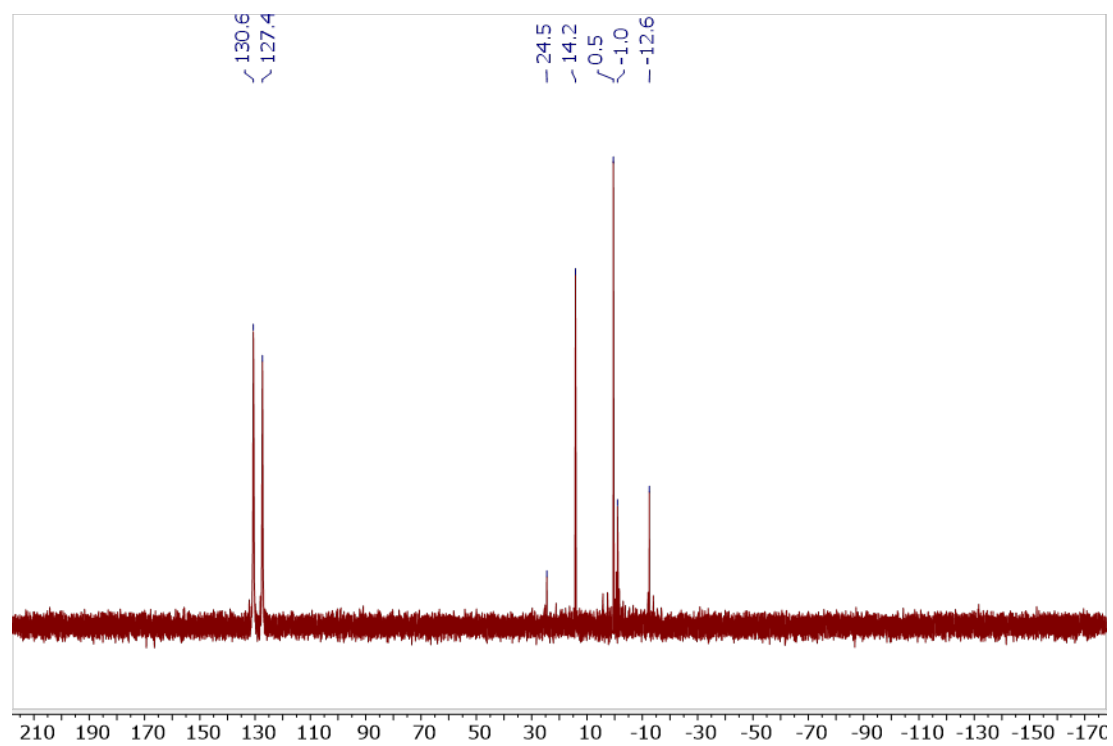

# Tetrazole

$^{31}\text{P}$  NMR (162 MHz, MeCN)  $\delta_{\text{P}}$  (ppm) 132.2

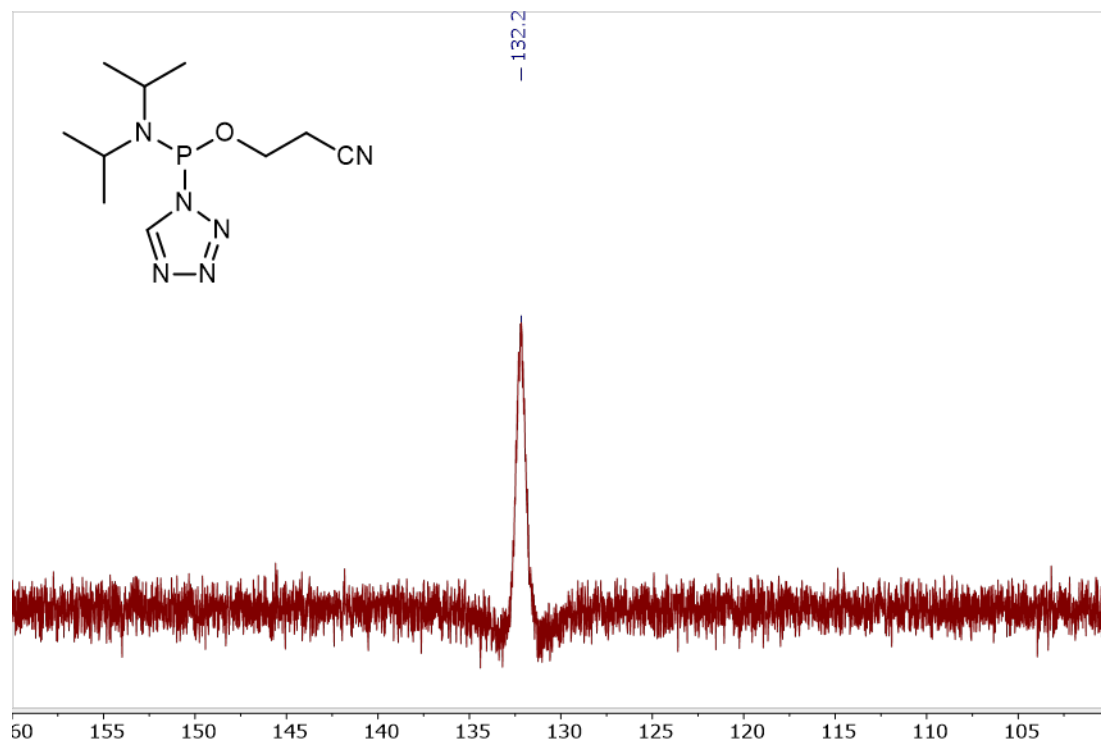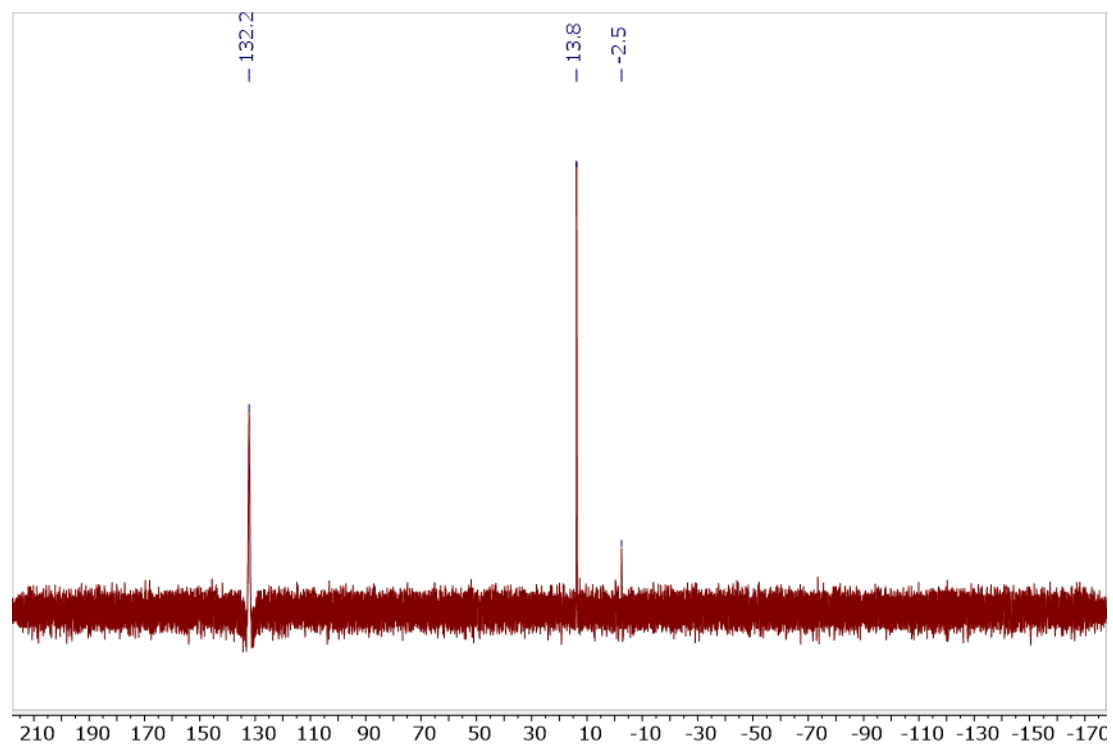

### 3-Nitro-1,2,4-triazole

$^{31}\text{P}$  NMR (162 MHz, MeCN)  $\delta_{\text{P}}$  (ppm) 134.7

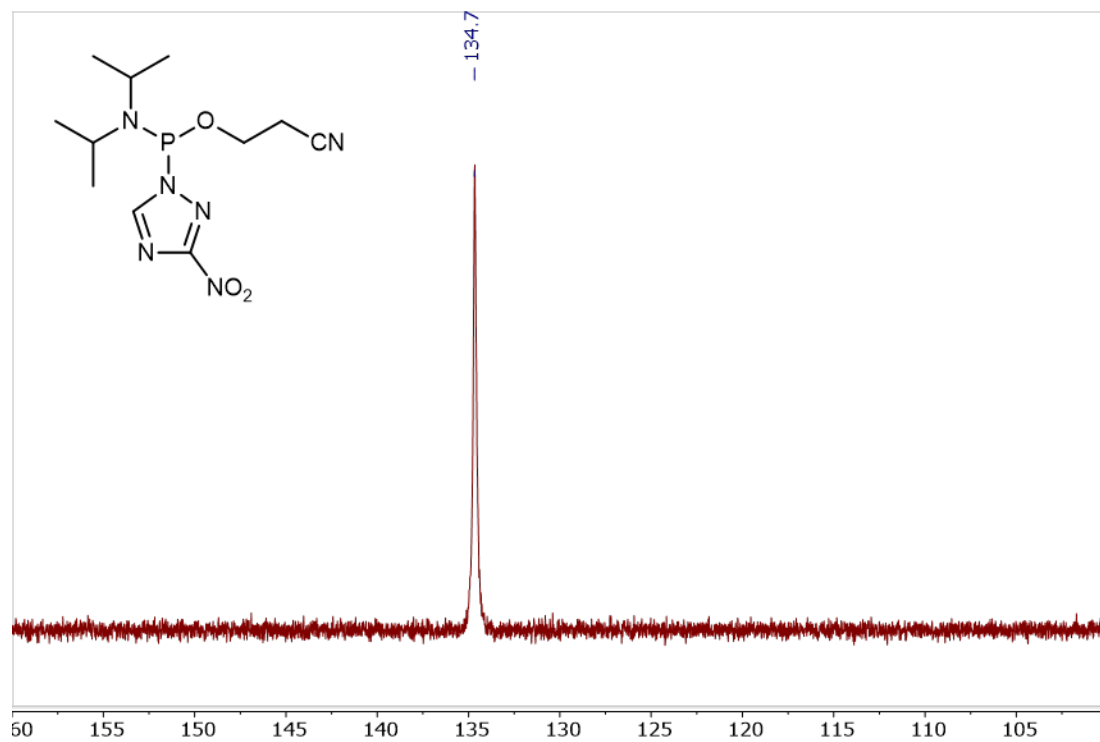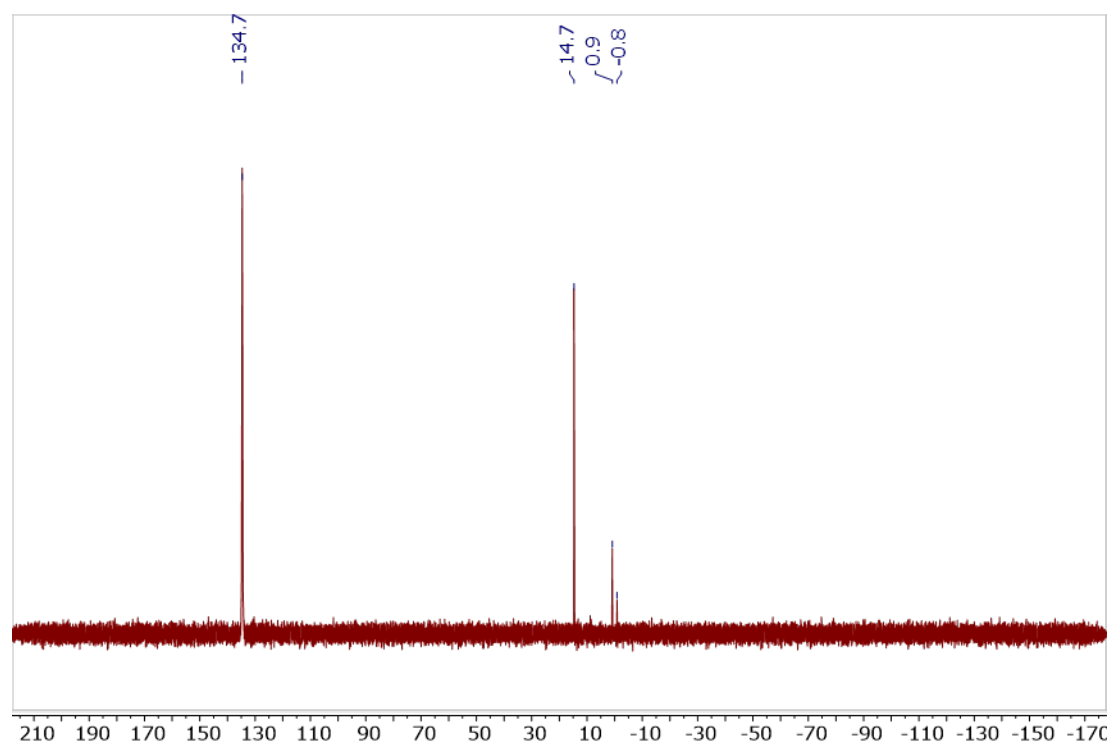

## Synthesis of Heterocycles

### Synthesis of **Het3**

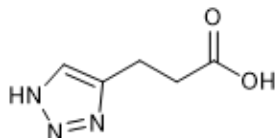

3-(1H-1,2,3-Triazol-4-yl)propanoic acid was prepared according to previously published procedures and reported data are consistent with reported values.<sup>1</sup>

### Synthesis of **Het5**

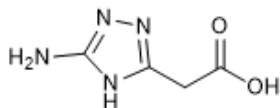

5-Amino-1,2,4-triazol-3-yl-acetic acid was prepared according to previously published procedures and data are consistent with reported values.<sup>2</sup>

### Synthesis of **Het5.1**

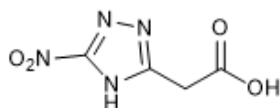

2-(5-Nitro-4H-1,2,4-triazol-3-yl)acetic acid was prepared according to previously published procedures and data are consistent with reported values.<sup>3</sup>

## Functionalization of Resins

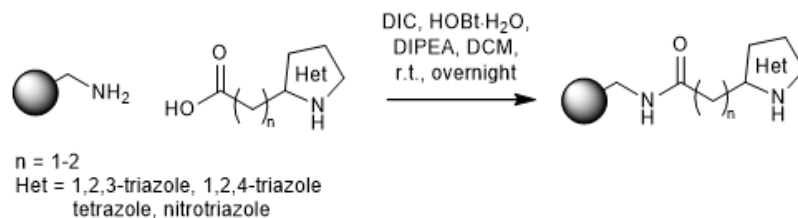

### General procedure for coupling between amine-functionalised resins and carboxylic acids

The carboxylic acid (0.205 M, 1.03 mmol, 10 eq) was dissolved in 5 mL CH<sub>2</sub>Cl<sub>2</sub> and DIC (0.205 M, 1.03 mmol, 10 eq), DIPEA (0.615 M, 3.08 mmol, 30 eq), and HOBT·H<sub>2</sub>O (0.205 M, 1.03 mmol, 10 eq) were added. The mixture was stirred at rt for 20 mins and then added to the amine-functionalised resin (0.103 mmol, 1 eq) in a plastic column (PD-10 from GE Lifesciences) and shaken overnight at rt. The resin was then washed with MeOH, CH<sub>2</sub>Cl<sub>2</sub>, and Et<sub>2</sub>O. The beads were analysed by Kaiser test which gave negative results for amines suggesting quantitative coupling yields.

This procedure was performed for the following resin and heterocycle combinations:

TentaGel™ S-NH<sub>2</sub> (TG) was functionalised with  
2-(4H-1,2,4-triazol-3-yl)acetic acid (**TG-Het2**)  
3-(1H-1,2,3-triazol-5-yl)propanoic acid (**TG-Het3**)  
2-(1H-tetrazol-5-yl)acetic acid (**TG-Het4**)  
2-(5-nitro-4H-1,2,4-triazol-3-yl)acetic acid (**TG-Het5.1**)

Amino-SynBase™ Controlled Pore Glass 3000/110, LCAA (CPG) was functionalised with  
2-(1H-tetrazol-5-yl)acetic acid (**CPG-Het4**)  
2-(5-nitro-4H-1,2,4-triazol-3-yl)acetic acid (**CPG-Het5.1**)

(Aminomethyl)polystyrene (AM-PS) was functionalised with  
2-(1H-tetrazol-5-yl)acetic acid (**AM-PS-Het4**)  
2-(5-nitro-4H-1,2,4-triazol-3-yl)acetic acid (**AM-PS-Het5.1**)

PEGA was functionalised with  
2-(1H-tetrazol-5-yl)acetic acid (**PEGA-Het4**)

Aminomethyl ChemMatrix® (AM-CM) was functionalised with  
2-(1H-tetrazol-5-yl)acetic acid (**AM-CM-Het4**)

TentaGel® XV HMPA (TG-XV) Resin was functionalised with  
2-(1H-tetrazol-5-yl)acetic acid (**TG-XV-Het4**)

HypoGel® RAM Resin (HypoGel) was functionalised with  
2-(1H-tetrazol-5-yl)acetic acid (**HypoGel-Het4**)

Aminobutyl Polystyrene (AB-PS) was functionalised with 2-(1H-tetrazol-5-yl)acetic acid (**AB-PS-Het4**)

Imidazole functionalization of TentaGel™ S-NH<sub>2</sub> (**TG-Het1**)

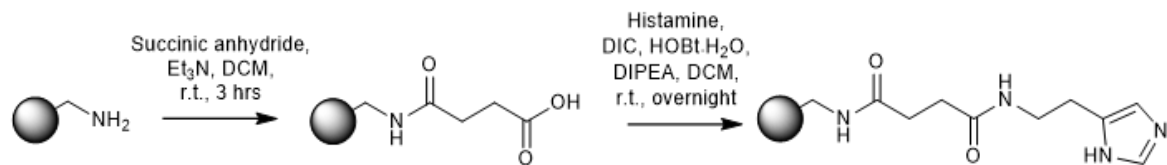

Succinic anhydride (100 mg, 1.0 mmol, 7.4 eq) was dissolved in CH<sub>2</sub>Cl<sub>2</sub> (5 mL) and Et<sub>3</sub>N (0.138 mL, 1.0 mmol, 7.4 eq) was added. The mixture was added to TentaGel™ S-NH<sub>2</sub> (300 mg, 0.45 mmol/g, 0.135 mmol, 1.0 eq) in a plastic tube and shaken at rt for 3 hrs. The resin was washed with CH<sub>2</sub>Cl<sub>2</sub> and Et<sub>2</sub>O. The beads were analysed by Kaiser test which gave negative results for amines meaning quantitative coupling yield.

A solution of DIC (0.11 mL, 0.68 mmol, 5.0), HOBT·H<sub>2</sub>O (103 mg, 0.24 mmol, 1.8 eq), and DIPEA (0.35 mL, 0.72 mmol, 5.3 eq) in CH<sub>2</sub>Cl<sub>2</sub> (4 mL) was added to the resin and shaken at rt for 30 mins. Histamine (75 mg, 0.68 mmol, 5.0 eq) was then added to the mixture and tube was shaken overnight at rt. The beads were then washed with MeOH, CH<sub>2</sub>Cl<sub>2</sub> and Et<sub>2</sub>O.



## Modification of NMR Tube

The bottom of an NMR tube (outer diameter: 5 mm) was cut off using a diamond tipped glass cutter (1). The glass was then melted under a torch and pulled with a tweezer (2). After cooling, a filter was added to the NMR tube (3). The resin could then be added and used for the following experiments (4).

### Instructions on how to make modified NMR tube

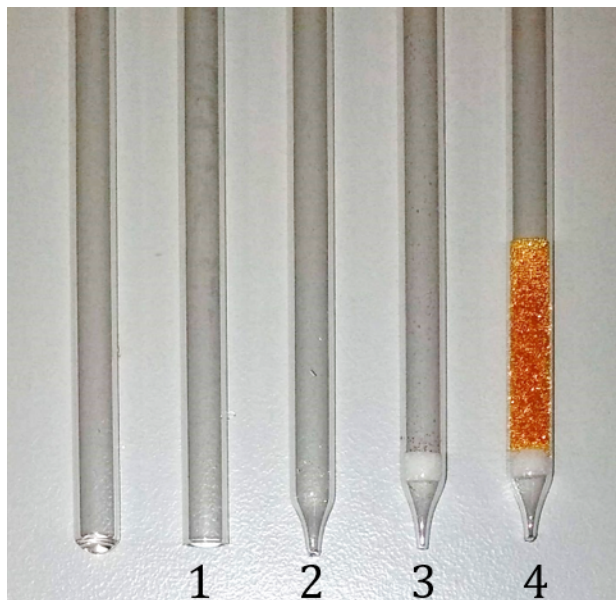

**Figure S1** | Step-by-step guide on how to prepare the modified NMR tubes. Figure by Alexander F. Sandahl

## Loading Studies

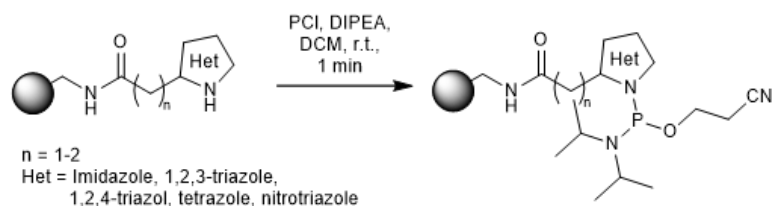

A modified NMR tube was loaded with TG-heterocycle resin (50 mg, 0.4 mmol/g, 0.2 mmol). The resin was washed with  $\text{CH}_2\text{Cl}_2$  (2 mL), and a solution of PCI (0.10 M, 0.20 mmol) and DIPEA (0.10 M, 0.20 mmol) in  $\text{CH}_2\text{Cl}_2$  (2 mL) was eluted over 1 min. The resin was then washed with  $\text{CH}_2\text{Cl}_2$  (2 mL) and a Gel Phase  $^{31}\text{P}$  NMR spectrum was recorded. MeOH (1 mL) was then eluted through the resin followed by  $\text{CH}_2\text{Cl}_2$  (2 mL) and a new Gel Phase  $^{31}\text{P}$  NMR spectrum was recorded.

It should be noted that a signal around 143-144 ppm is observed for imidazole (**TG-Het1**) and tetrazole (**TG-Het4**) which does not correlate with the P(III)-azolide. A likely structure may be the P(III) bound to the neighbouring amide to give a P(III)-imidate.

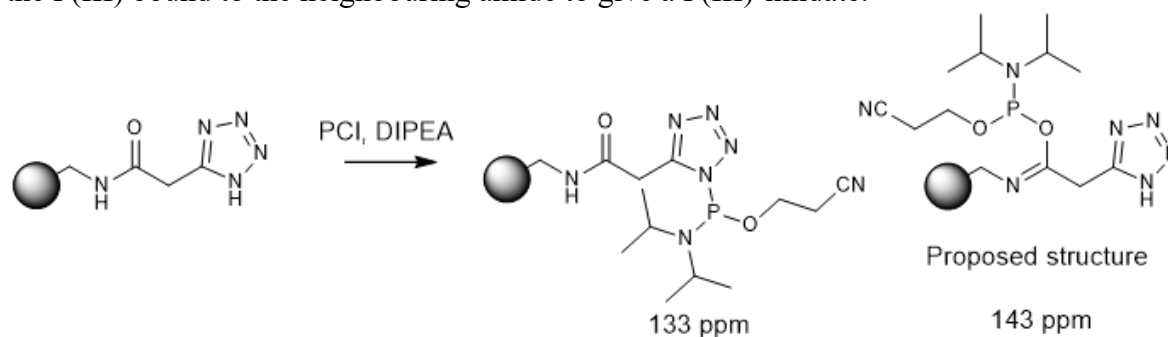

## TG-Het1 (Imidazole)

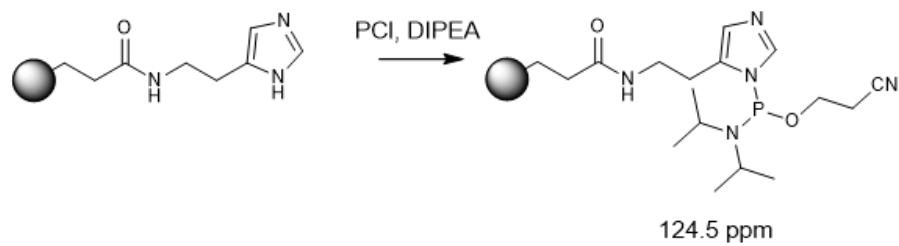

124.5 ppm

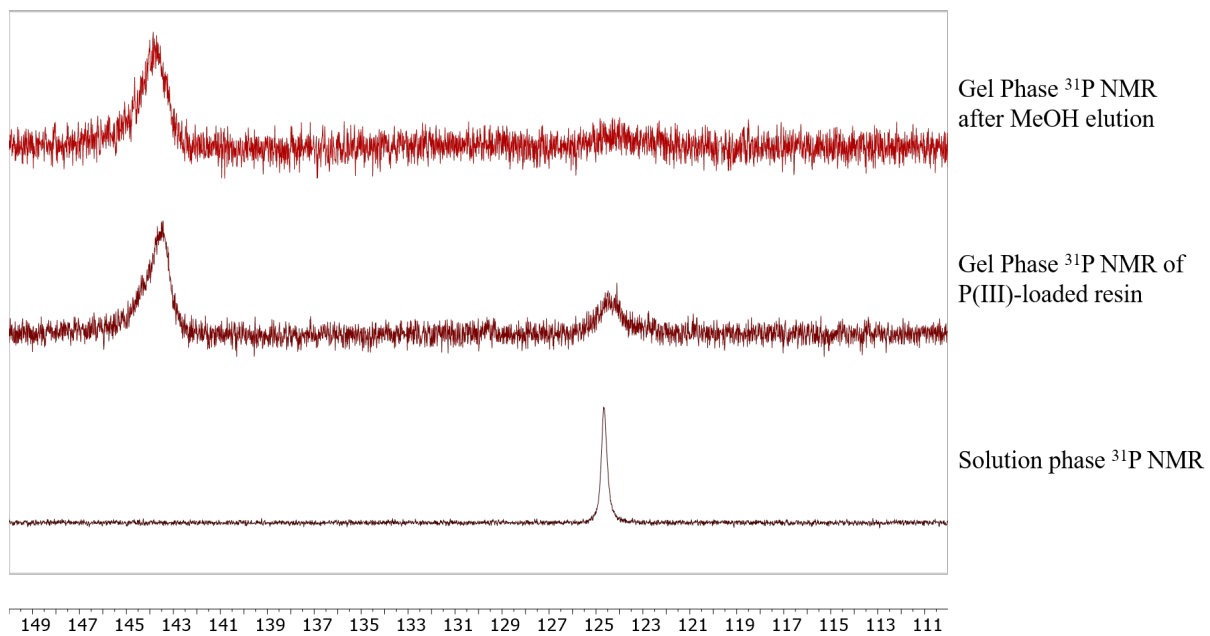

## TG-Het2.1 (1,2,3-Triazole)

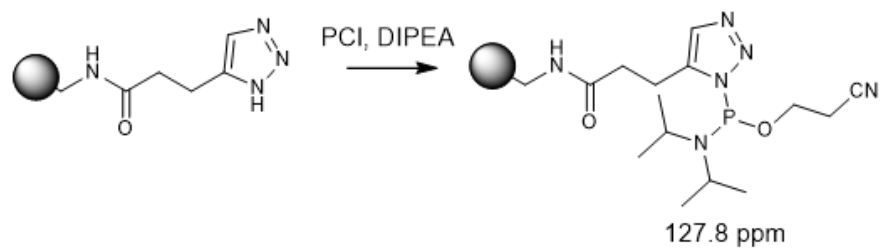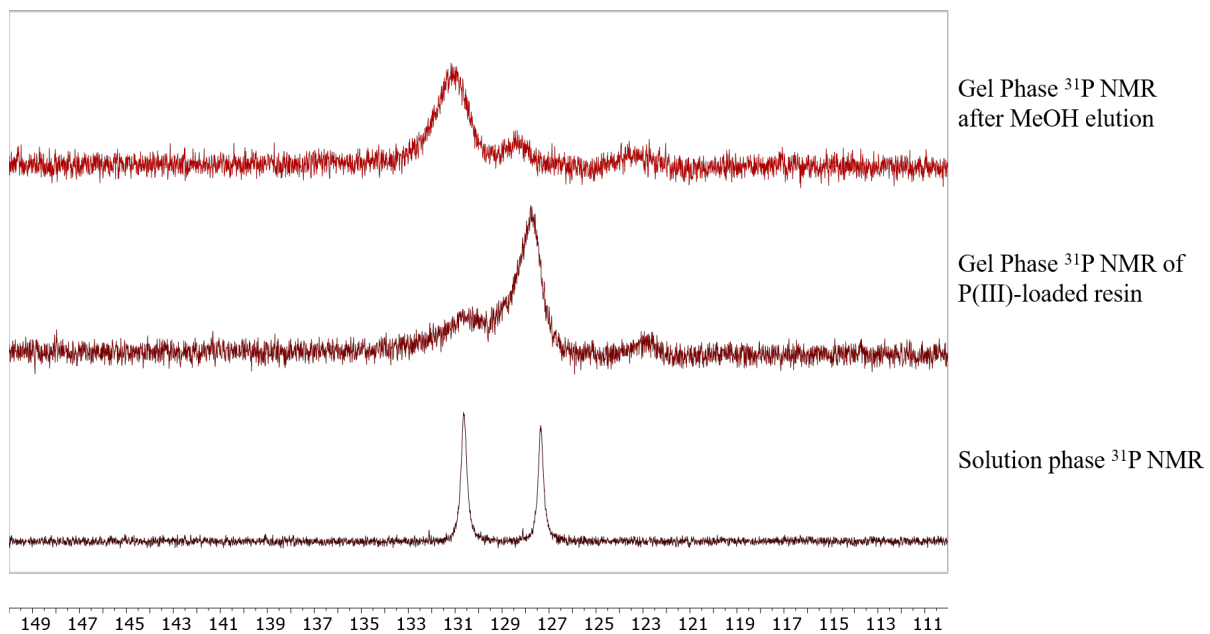

## TG-Het3 (1,2,4-Triazole)

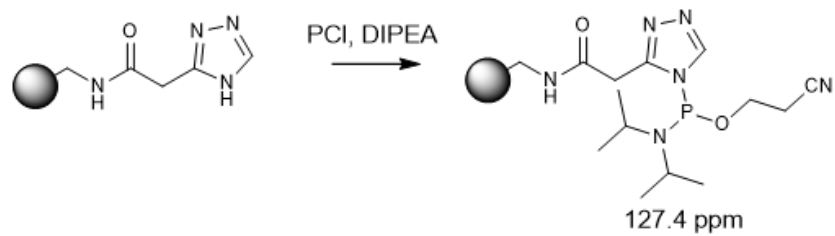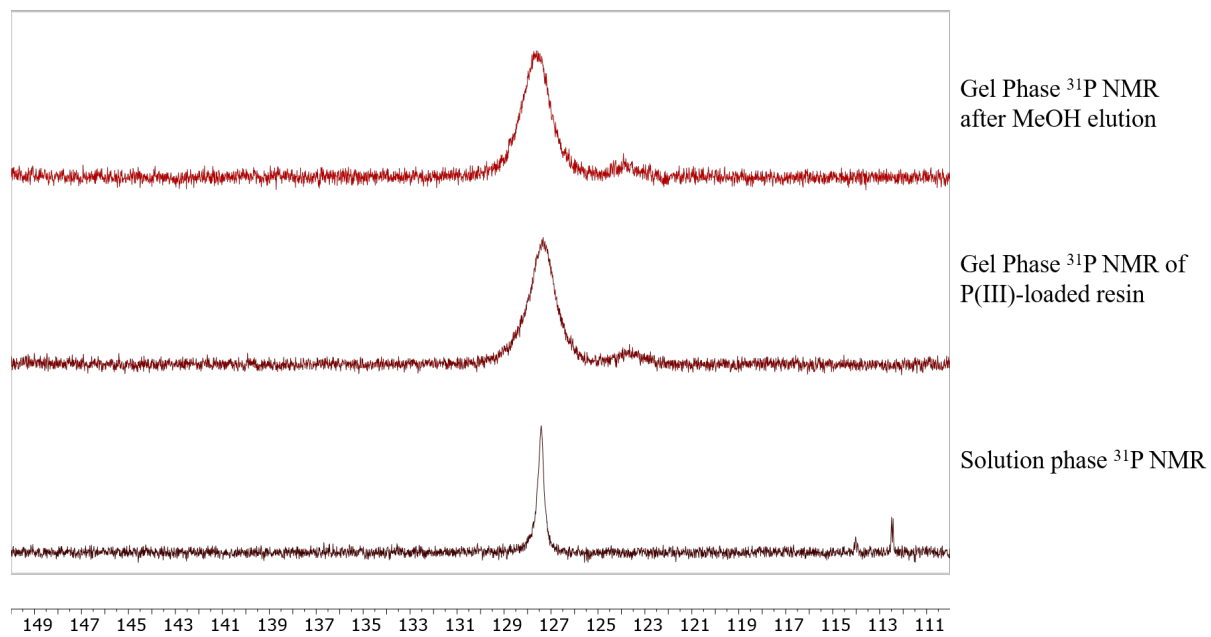

## TG-Het4 (Tetrazole)

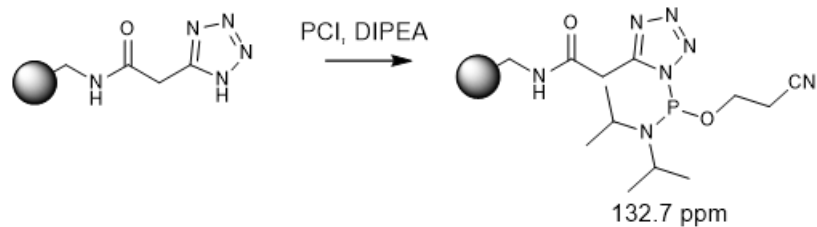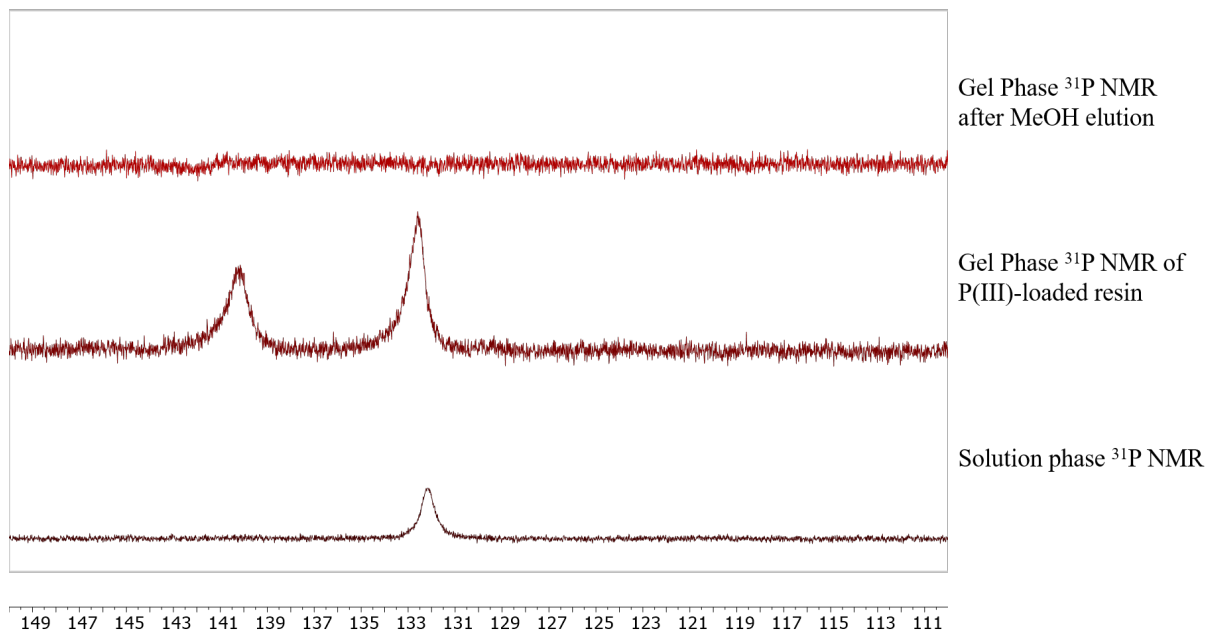

## TG-Het5.1 (Nitrotriazole)

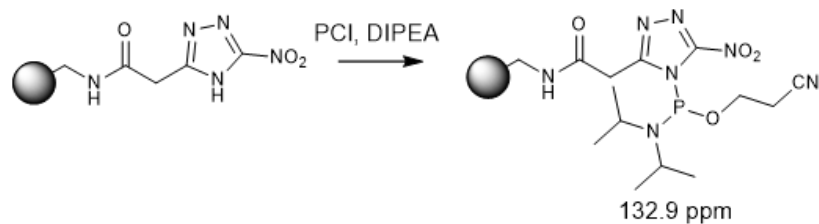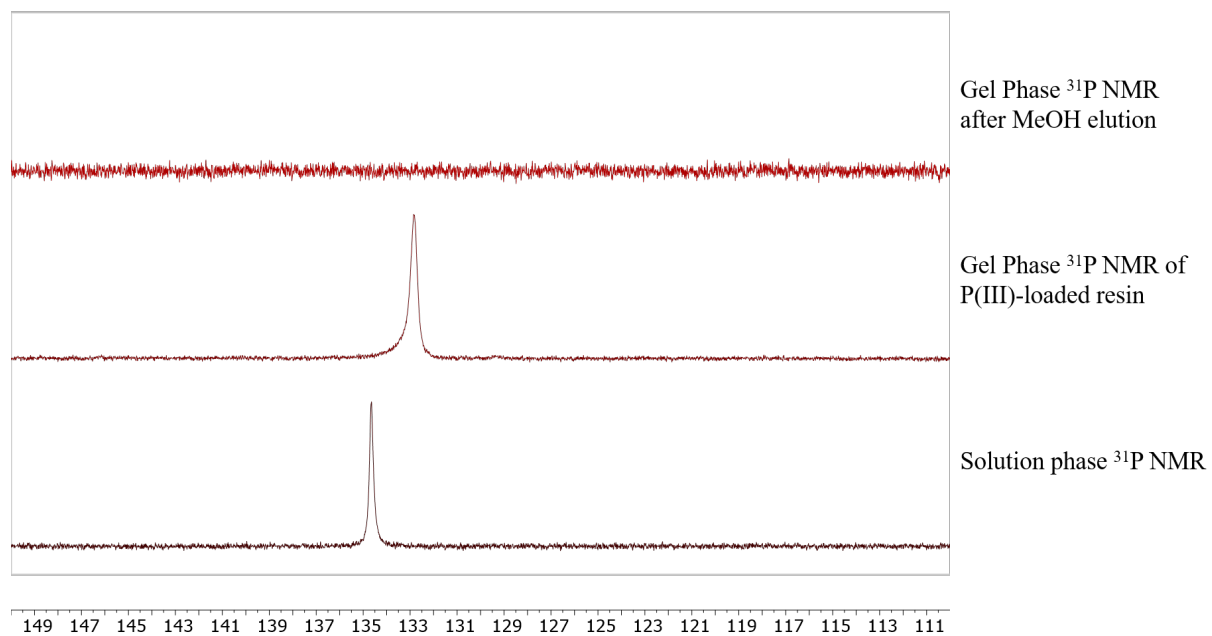

## Hygroscopicity Studies

Modified NMR tube was loaded with tetrazole-functionalised resin (50 mg, 0.050-0.075 mmol tetrazole). The resin was washed with  $\text{CH}_2\text{Cl}_2$  (2 mL) and then loaded with with  $\text{PCl}$  (0.10 M, 0.20 mmol) and DIPEA (0.1 M, 0.20 mmol) in  $\text{CH}_2\text{Cl}_2$  (2 mL) over 1 min. The resin was then washed with  $\text{CH}_2\text{Cl}_2$  (2 mL) and Gel Phase  $^{31}\text{P}$  NMR spectra were recorded over time. Signals in the range of 120-140 ppm correspond to the P(III)-azolides. The signal around 15 ppm corresponds to the H-phosphonate from hydrolysis and the signals around 0 ppm corresponds to P(V) species through oxidation.

### AM-PS-Het4

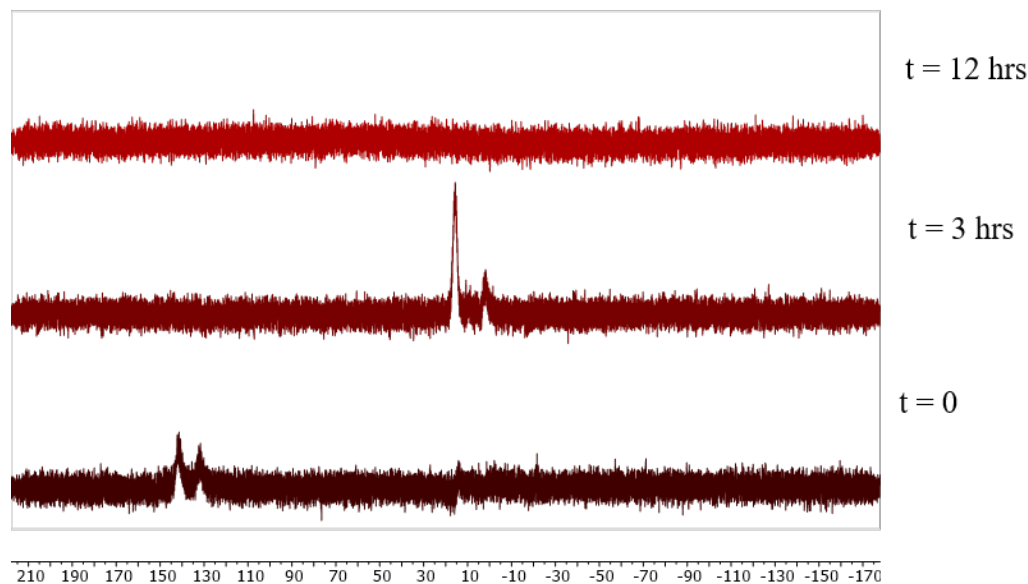

### PEGA-Het4

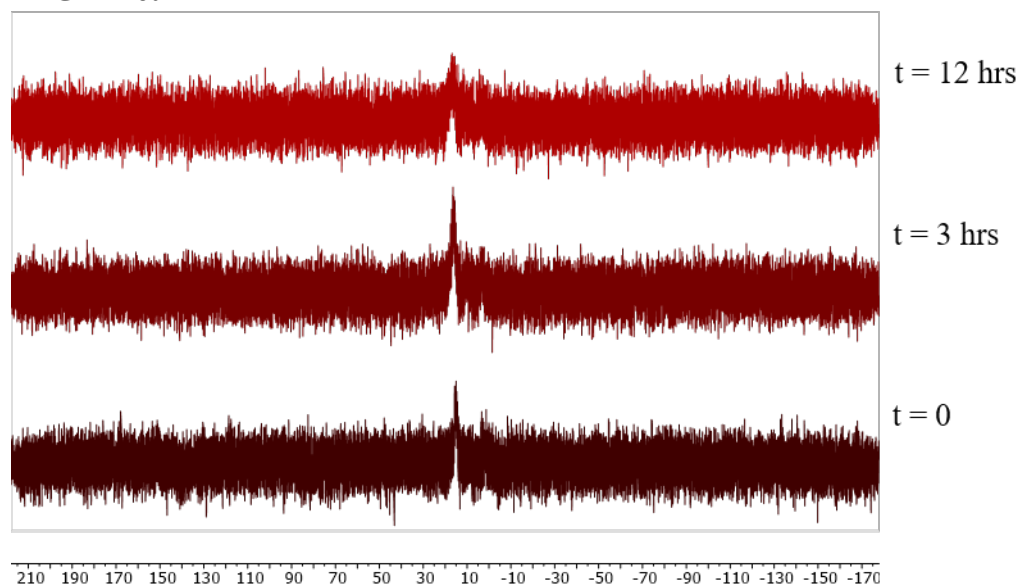



### AM-CM-Het4

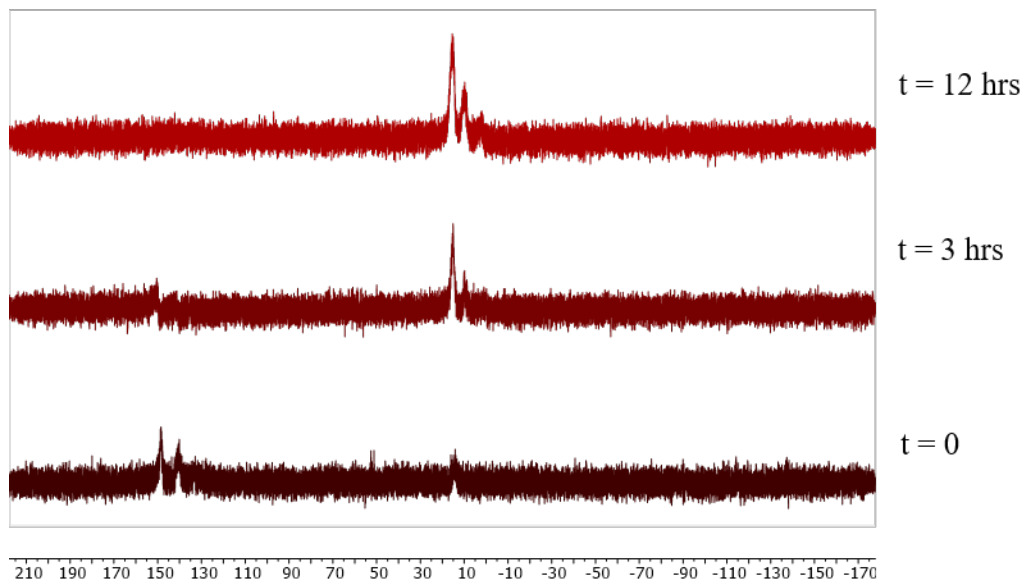

### AB-PS-Het4

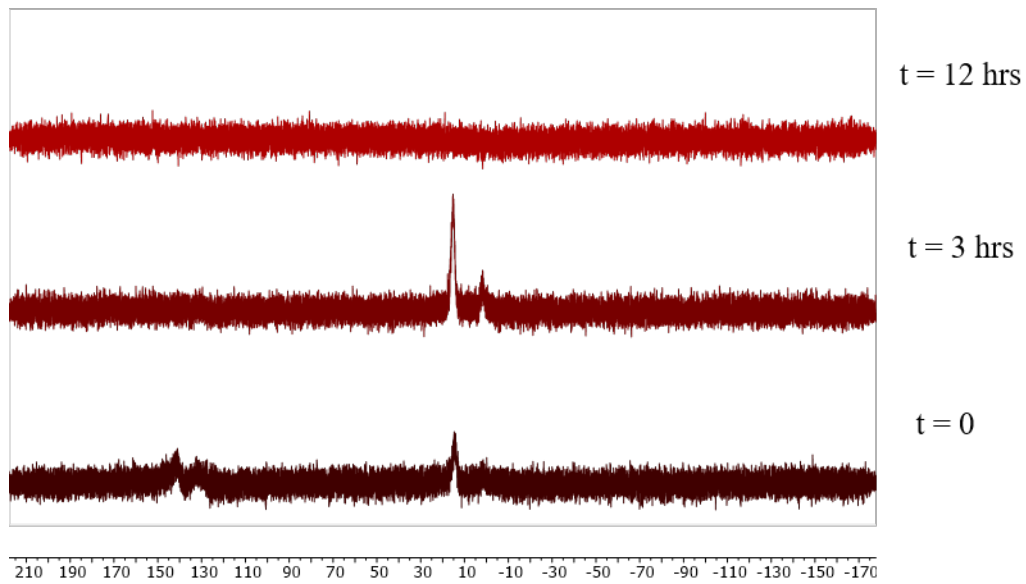

### HypoGel-Het4

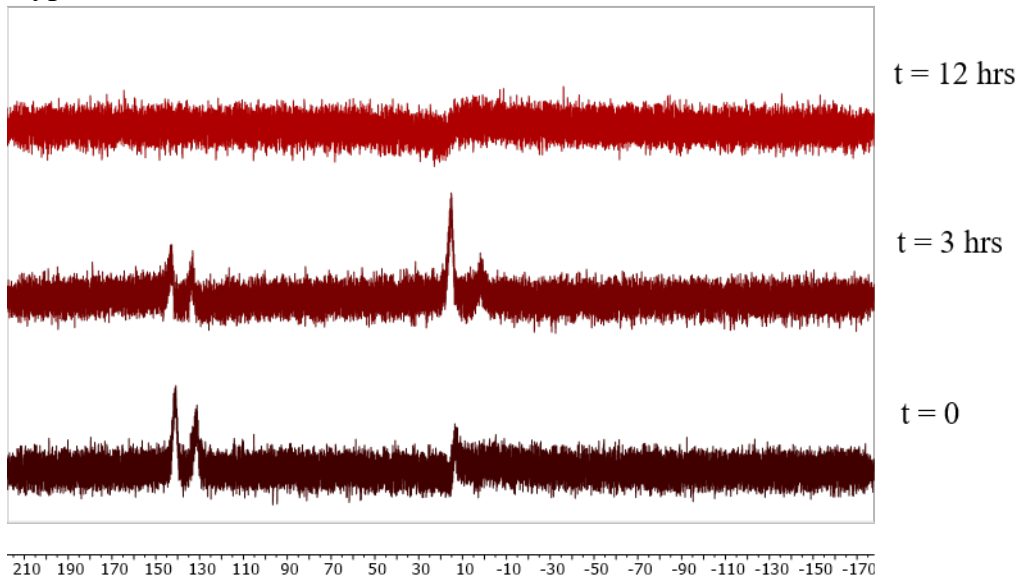

### TG-XV-Het4

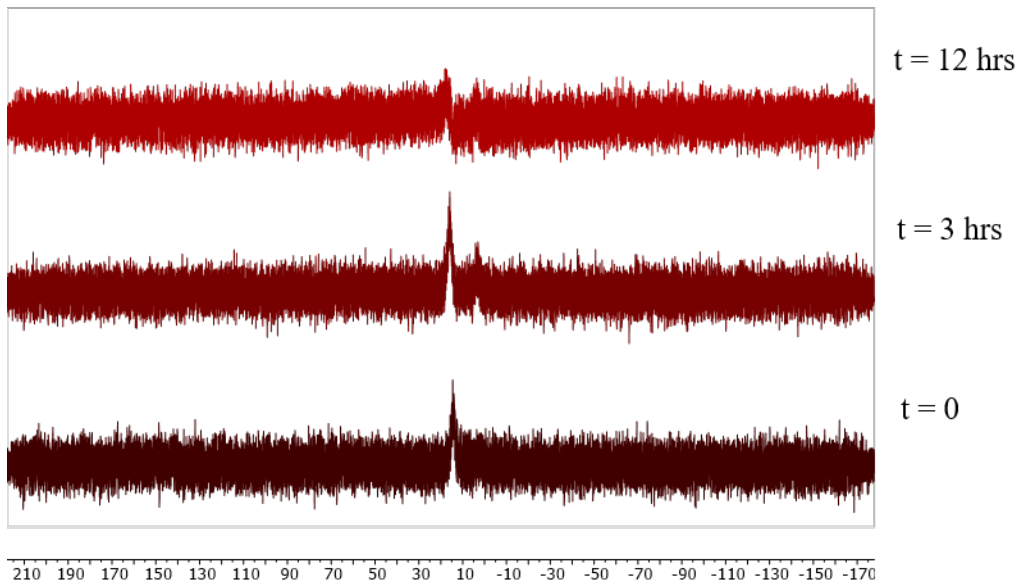

A modified NMR tube was loaded with **AM-PS-Het5.1** or **HypoGel-Het5.1** (50 mg). The resin was washed with CH<sub>2</sub>Cl<sub>2</sub> (2 mL) and then loaded with with PCl (0.10 M, 0.20 mmol) and DIPEA (0.10 M, 0.20 mmol) in CH<sub>2</sub>Cl<sub>2</sub> (2 mL) over 1 min. The resin was then washed with CH<sub>2</sub>Cl<sub>2</sub> (2 mL) and <sup>31</sup>P Gel Phase NMR spectra were recorded over time.

### HypoGel-Het5.1

**Table S1.** Summary of results for hygroscopicity study of **HypoGel-Het5.1**

| Time / hours       | 0   | 1   | 3   | 5   | 7  |
|--------------------|-----|-----|-----|-----|----|
| Amount of P(III)-N | 81% | 68% | 38% | 18% | 0% |

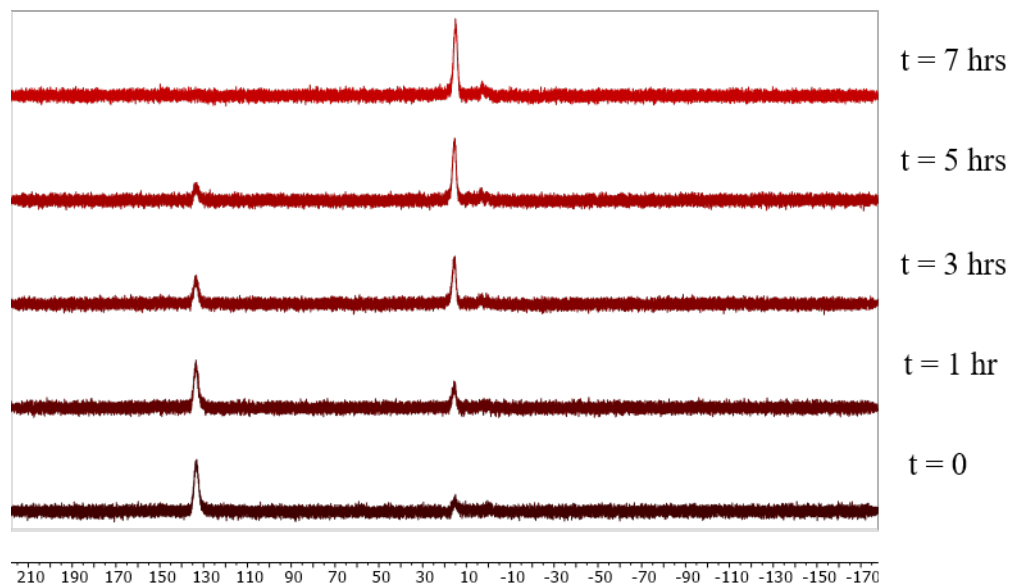

## AM-PS-Het5.1

**Table S2.** Summary of results for hygroscopicity study of **AM-PS-Het5.1**

| Time / hours       | 0   | 1   | 3   | 5   | 7   |
|--------------------|-----|-----|-----|-----|-----|
| Amount of P(III)-N | 94% | 78% | 49% | 34% | 24% |

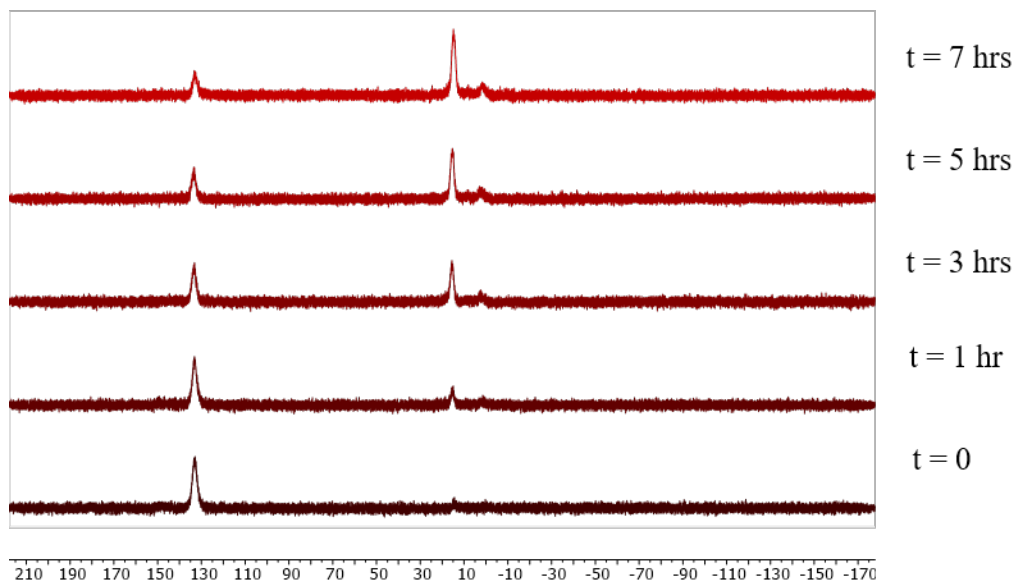

## Overlay of Reference Spectra for $^{19}\text{F}$ NMR Analysis

Structures of 5'DMTr-floxuridine (**1**) and 3'-phosphoramidite-5'DMTr-floxuridine (**1-P**)

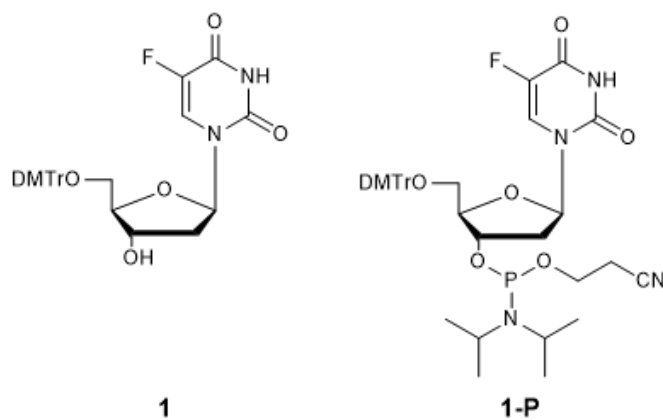

$^{19}\text{F}$  NMR Spectrum 1: **1-P** in  $\text{CH}_2\text{Cl}_2$

$^{19}\text{F}$  NMR Spectrum 2: Mixture of **1-P** and **1** in  $\text{CH}_2\text{Cl}_2$

$^{19}\text{F}$  NMR Spectrum 3: **1** in  $\text{CH}_2\text{Cl}_2$

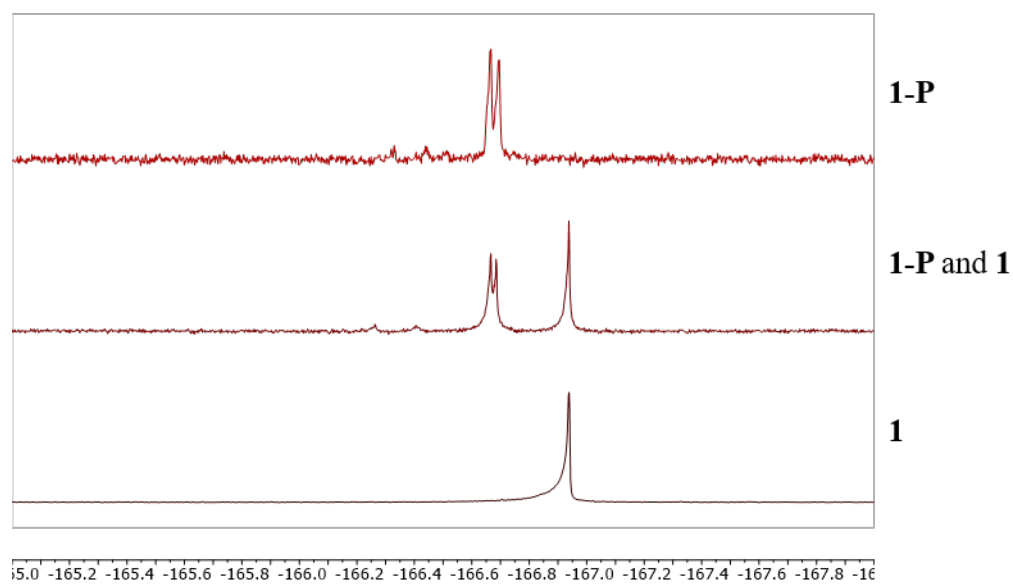

## Base Screen

A modified NMR tube was loaded with **AM-PS-Het5.1** (50 mg, 0.50-0.75 mmol nitrotriazole). The resin was washed with CH<sub>2</sub>Cl<sub>2</sub> (2 mL) and then loaded by elution of PCI (0.10 M, 0.20 mmol) and DIPEA (0.10 M, 0.02 mmol) in CH<sub>2</sub>Cl<sub>2</sub> (2 mL) over 1 min. The resin was washed with CH<sub>2</sub>Cl<sub>2</sub> (2 mL) before elution and collection of a solution of **1** (9 mg, 0.025 M, 0.025 mmol) with base (0.10 M, 0.10 mmol) in CH<sub>2</sub>Cl<sub>2</sub> (1 mL) over 40 s. The eluate was directly analysed by <sup>19</sup>F NMR spectroscopy.

**Table S3.** Results of base screen

| Base          | <sup>19</sup> F NMR Conversion* / % |
|---------------|-------------------------------------|
| -             | 13                                  |
| <b>9AJ</b>    | <b>96</b>                           |
| DABCO         | 27                                  |
| DBU           | 18                                  |
| DIPEA         | 12                                  |
| DMAP          | 42                                  |
| NMI           | 23                                  |
| PPY           | 45                                  |
| Proton Sponge | 12                                  |
| Pyridine      | 5                                   |
| Quinoline     | 6                                   |
| Triethylamine | 15                                  |

\*Based on product/starting material ratio.

Abbreviations: 9AJ (9-azajulolidine), DABCO (1,4-diazabicyclo[2.2.2]octane), DBU (1,8-diazabicyclo[5.4.0]undec-7-ene), DIPEA (*N,N*-diisopropylethylamine), DMAP (4-dimethylaminopyridine), NMI (*N*-methylimidazole), PPY (4-pyrrolidinopyridine).

No base

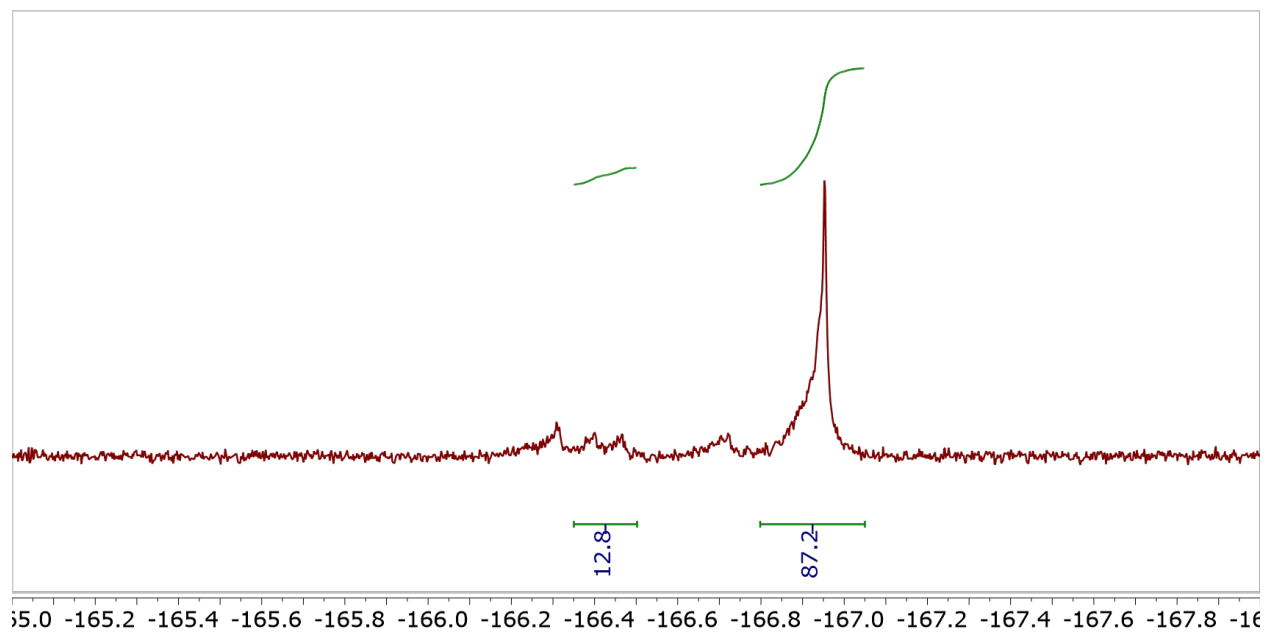

9AJ

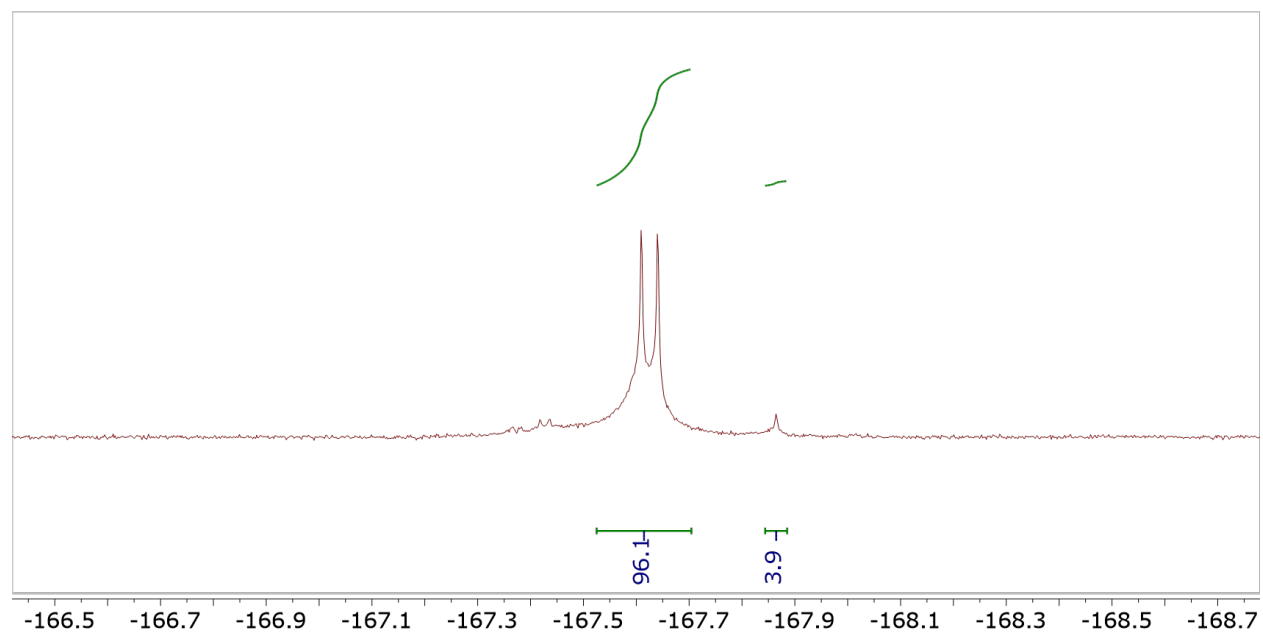

## DABCO

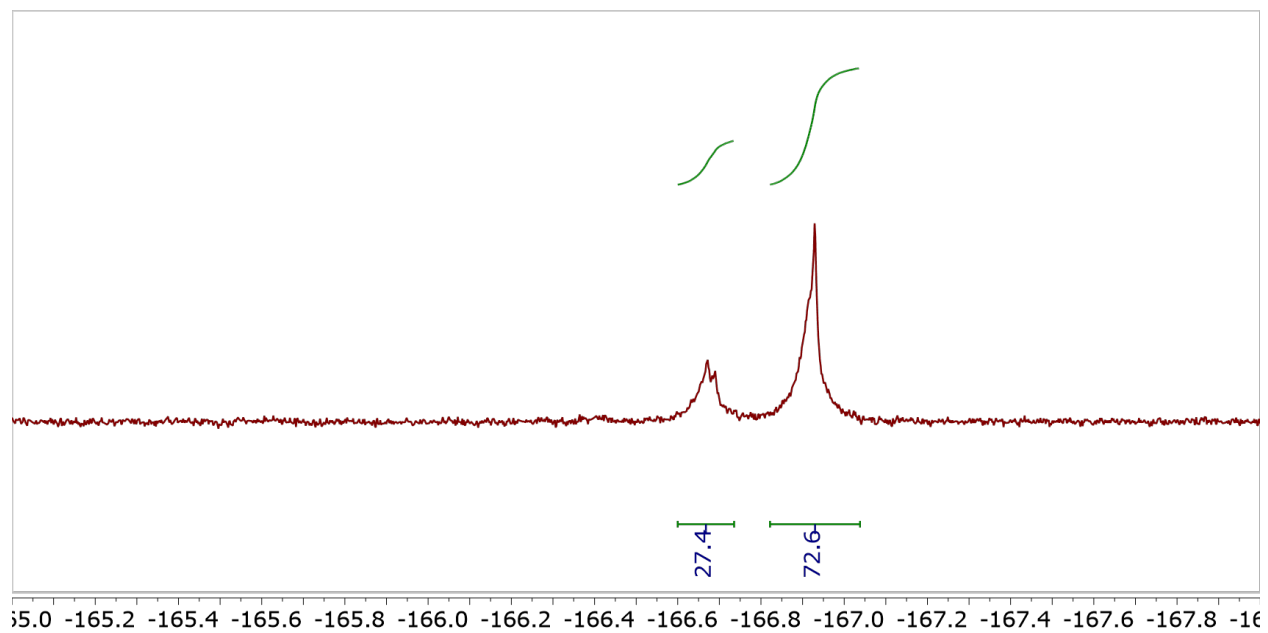

## DBU

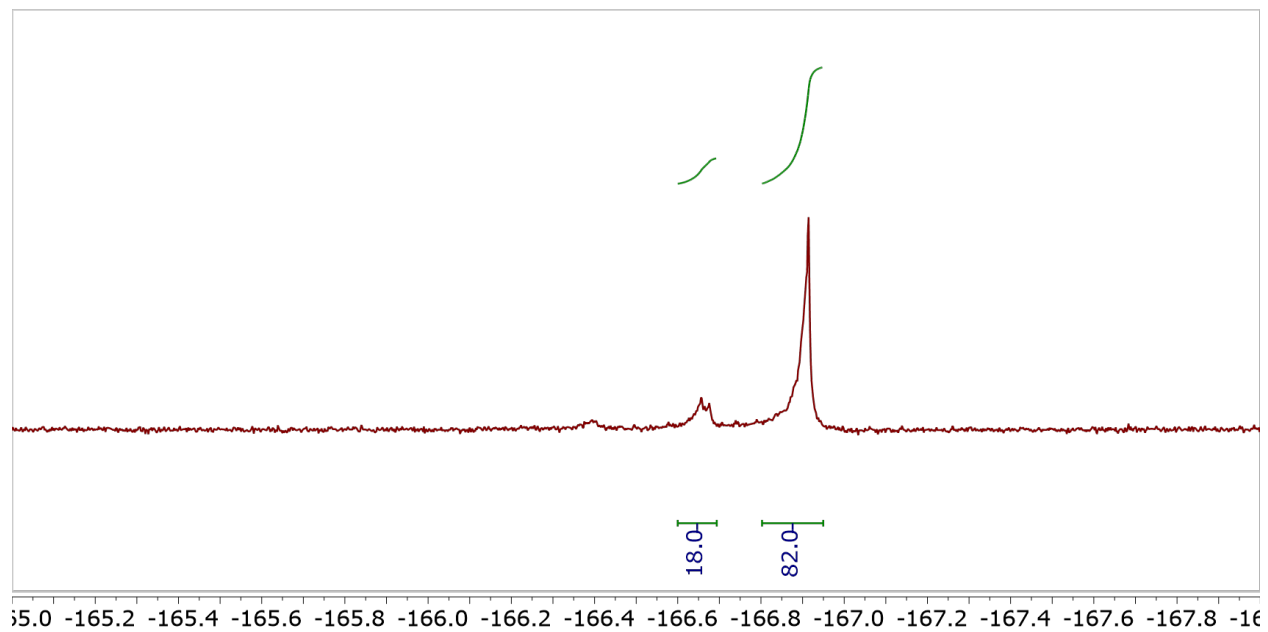



## DIPEA

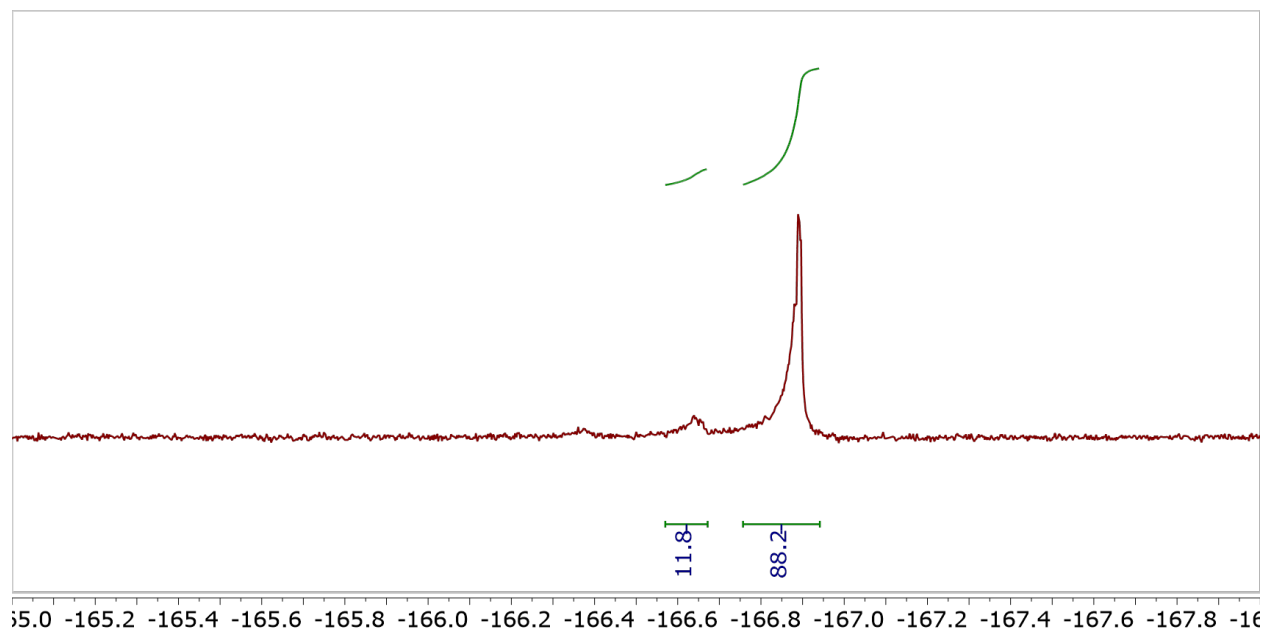

## DMAP

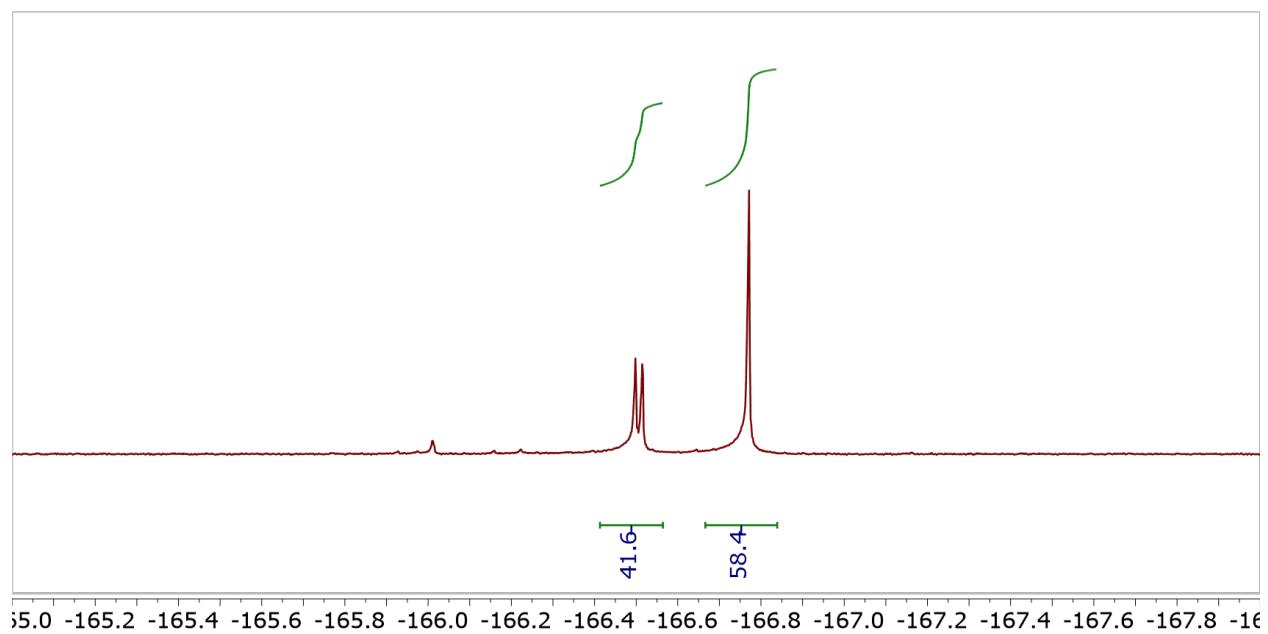

# NMI

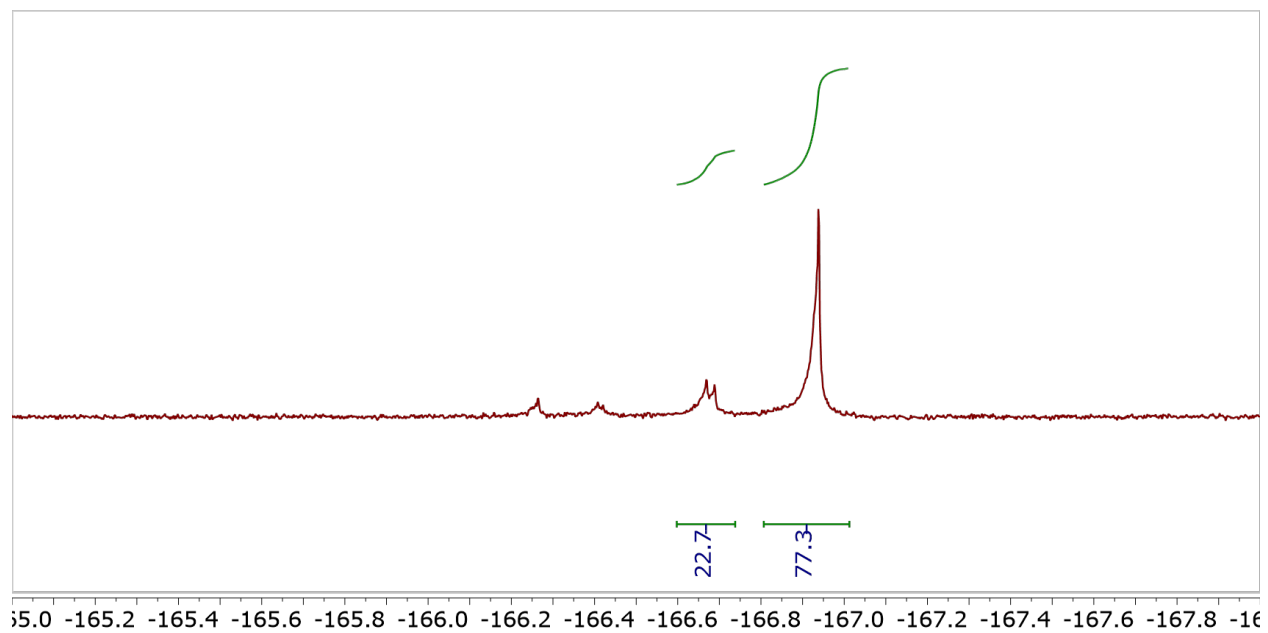

# PPY

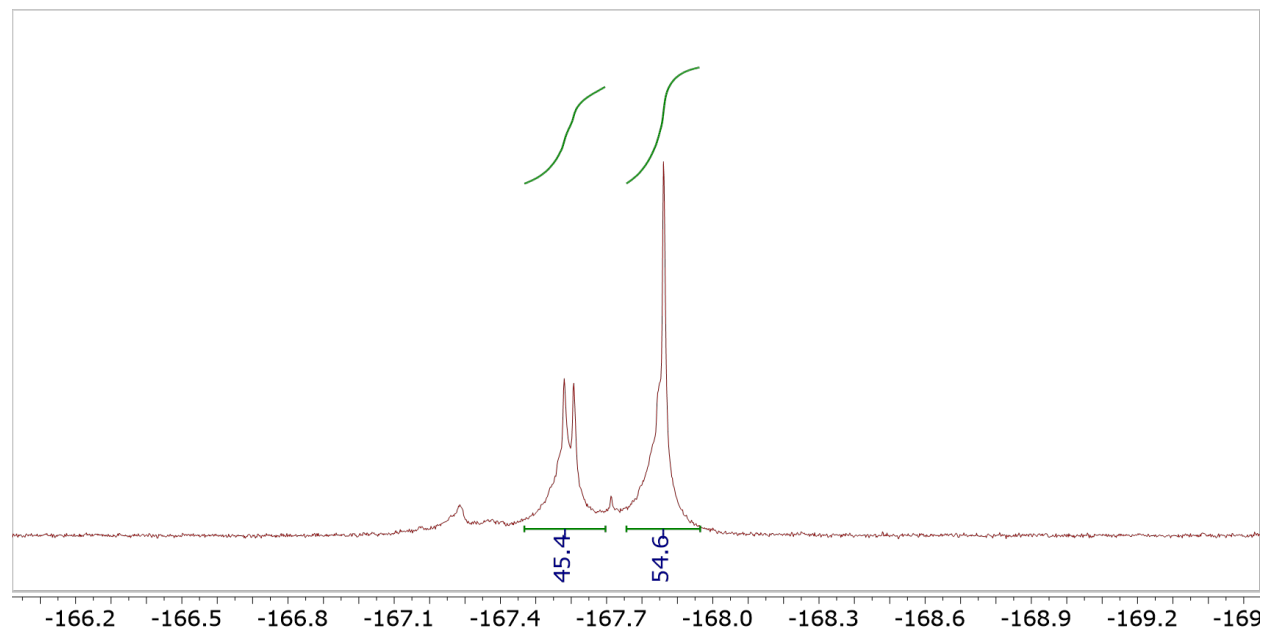

## Proton sponge

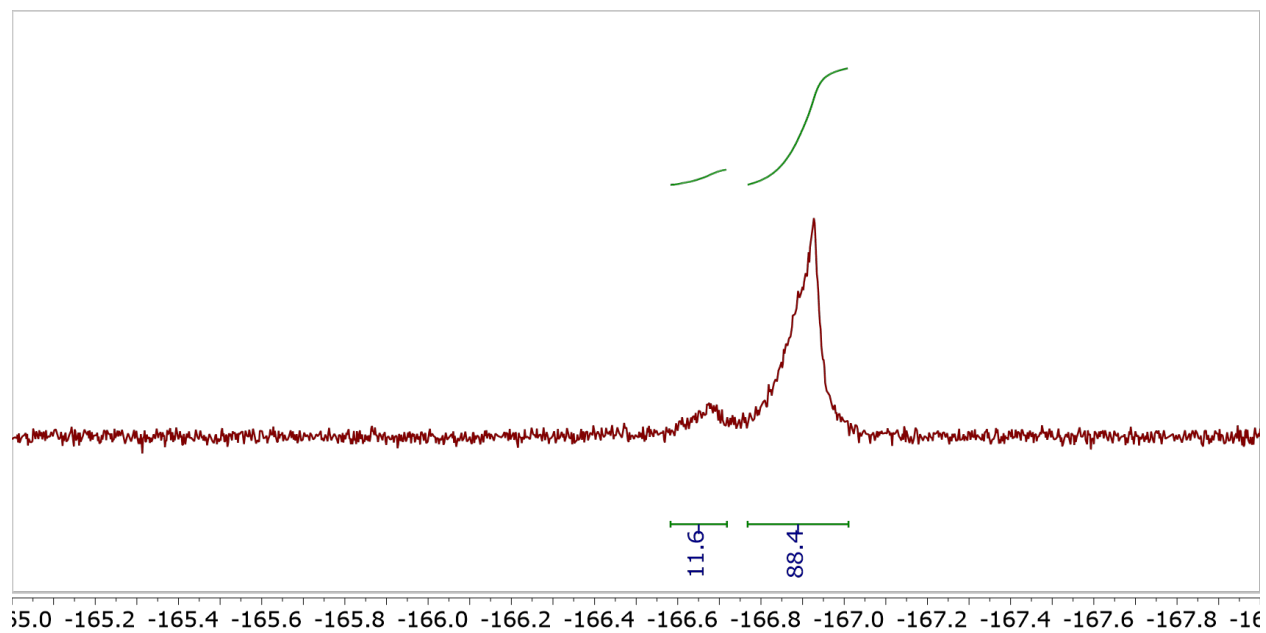

## Pyridine

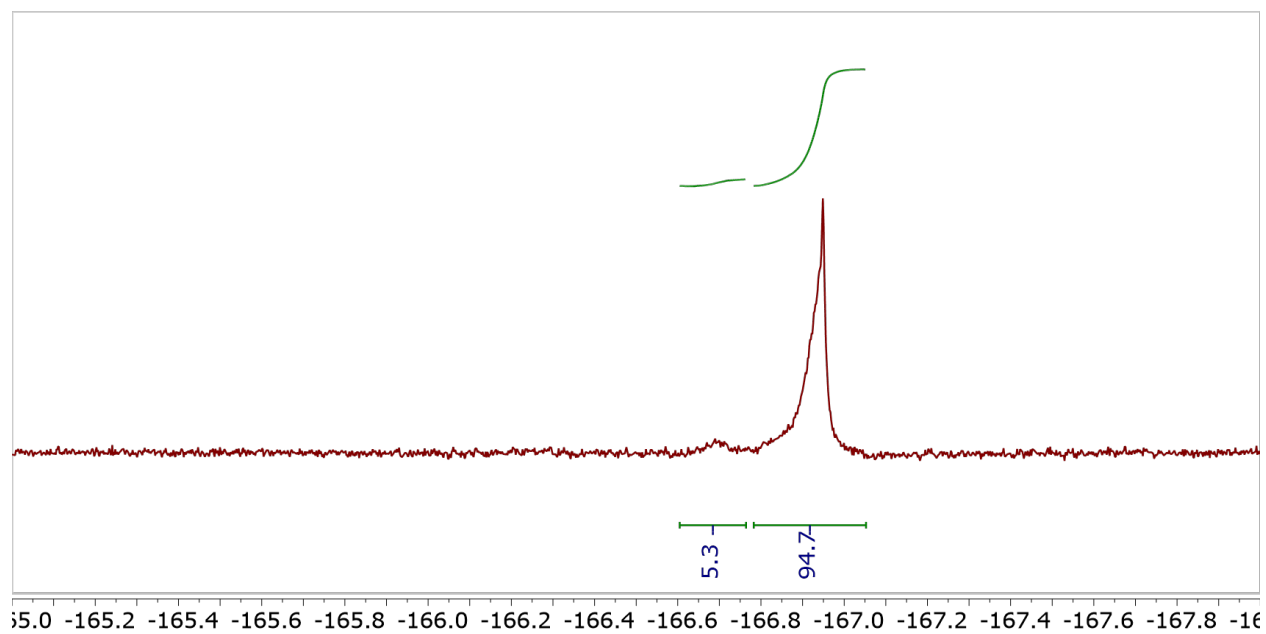

## Quinoline

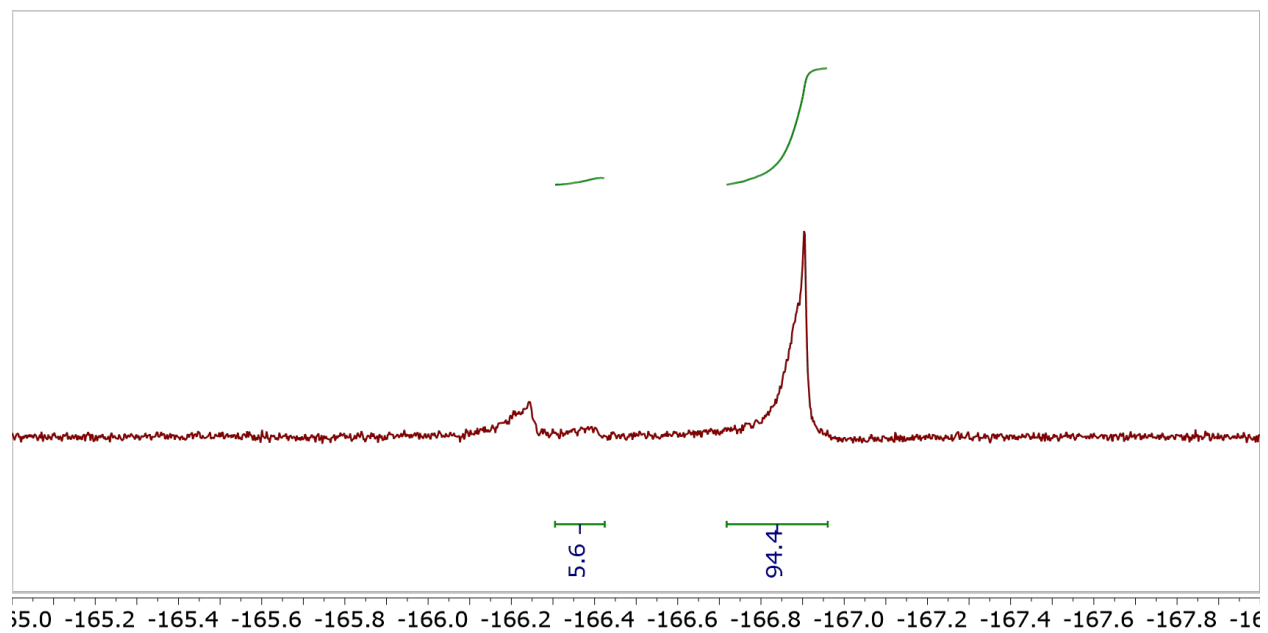

## Triethylamine

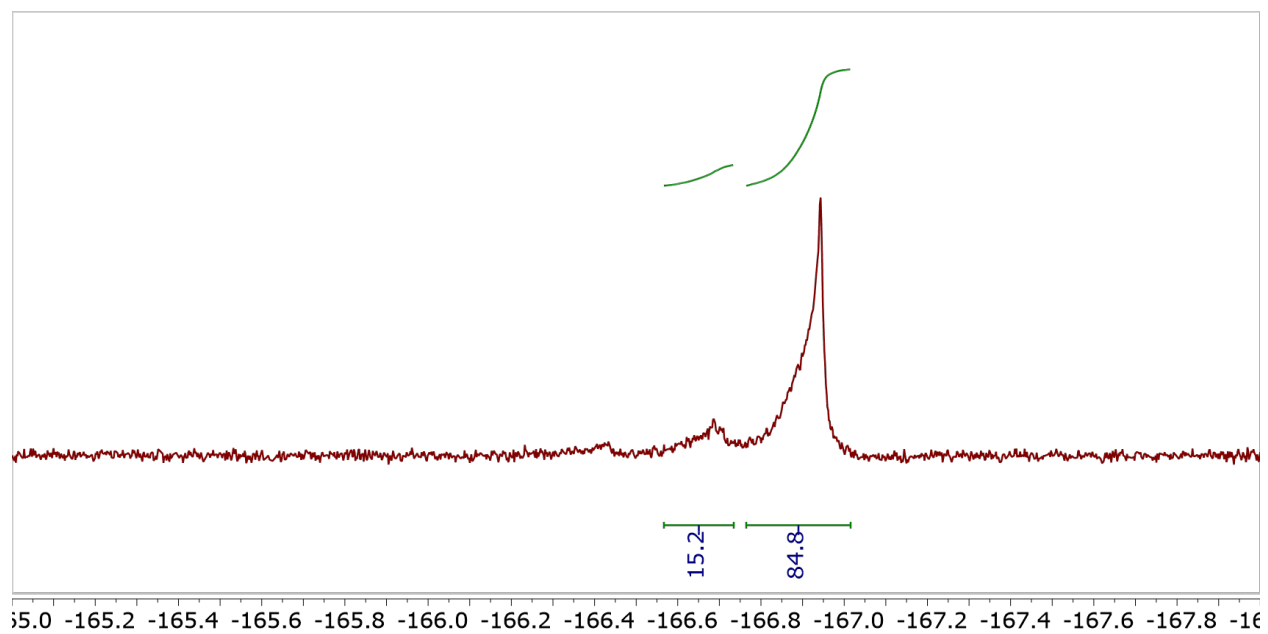

## <sup>31</sup>P NMR Study of Aminopyridine Intermediates

### Formation of P(III)-Aminopyridine species

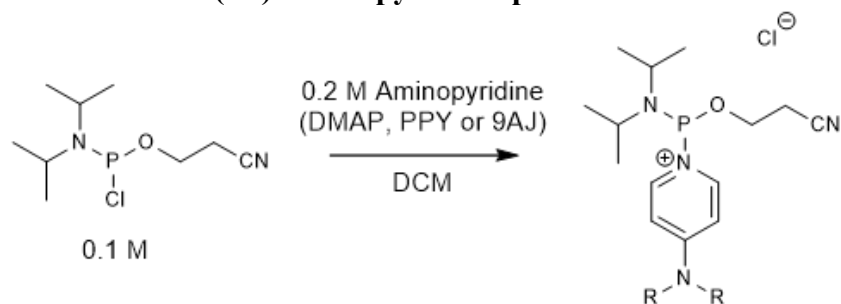

To a solution of PCI (0.5 mL, 0.1 M) dissolved in  $\text{CH}_2\text{Cl}_2$  in an NMR tube was added either DMAP, PPY or 9AJ (0.5 mL, 0.2 M) in  $\text{CH}_2\text{Cl}_2$ . <sup>31</sup>P NMR spectra were then recorded.

#### DMAP

<sup>31</sup>P NMR (162 MHz,  $\text{CH}_2\text{Cl}_2$ )  $\delta_{\text{P}}$  (ppm) 164.7

#### PPY

<sup>31</sup>P NMR (162 MHz,  $\text{CH}_2\text{Cl}_2$ )  $\delta_{\text{P}}$  (ppm) 158.2

#### 9AJ

<sup>31</sup>P NMR (162 MHz,  $\text{CH}_2\text{Cl}_2$ )  $\delta_{\text{P}}$  (ppm) 142.0

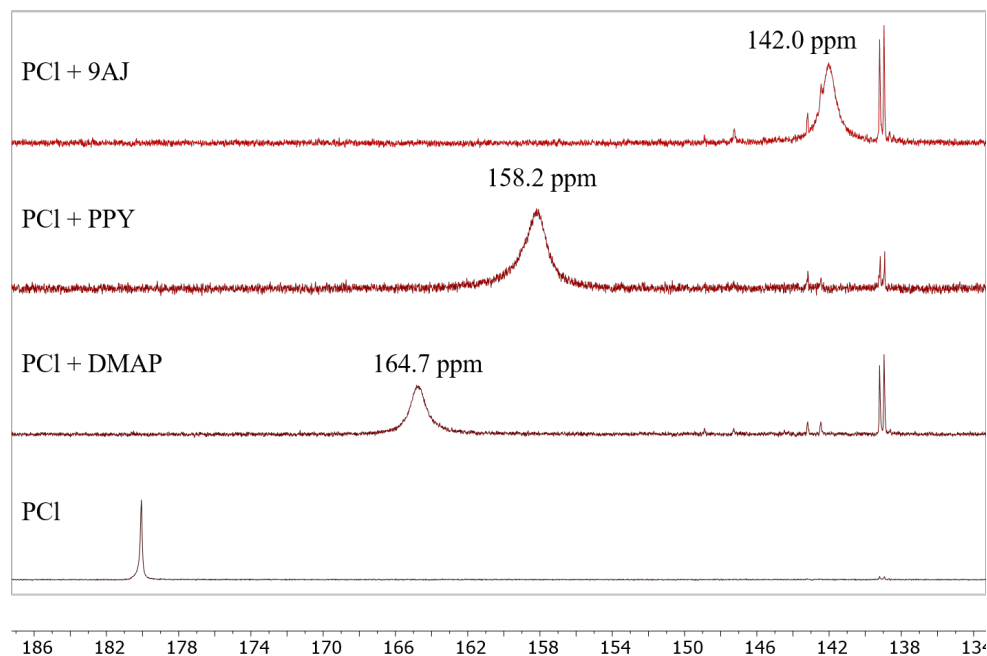

### Competition with between 9AJ and already formed P(III)-nitrotriazole

A solution of PCl (0.1 M) and nitrotriazole (0.2 M) in CH<sub>2</sub>Cl<sub>2</sub> (0.5 mL) was prepared and <sup>31</sup>P NMR spectra was recorded to confirm the formation of the P(III)-nitrotriazolide. Then a solution of 9AJ (0.2 M) in CH<sub>2</sub>Cl<sub>2</sub> (0.5 mL) was added to the NMR tube and <sup>31</sup>P NMR spectra was recorded. However, no change was observed upon addition of 9AJ.

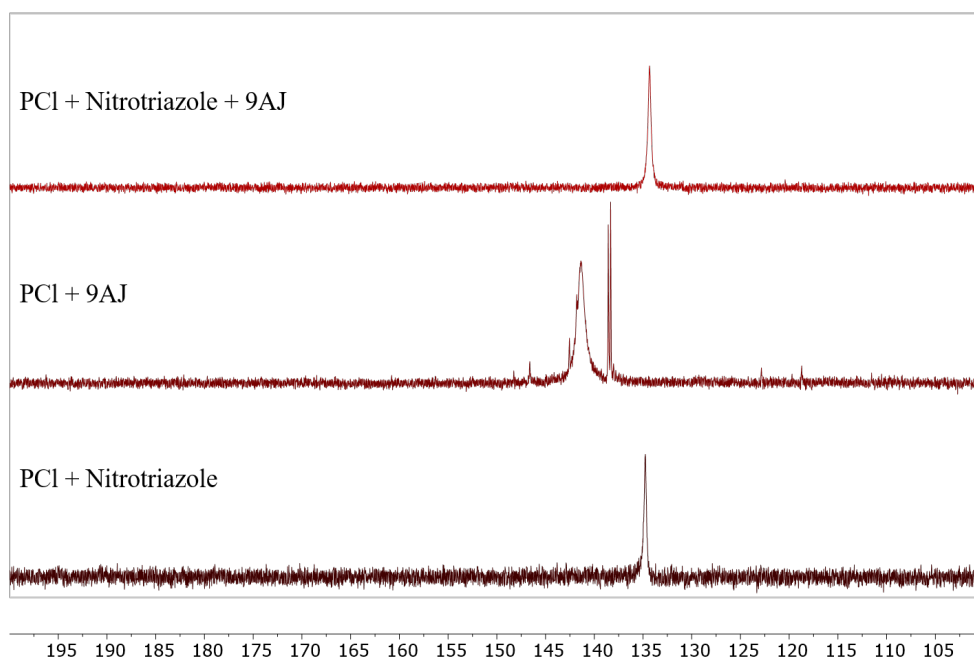

## Flow System Setup

### Flow System Description

The tubing throughout the system contained of stainless steel tubing (1/16'' OD x 0.75 mm ID) and connections were made with PEEK or stainless steel HPLC fittings (all with 1/16'' ID). A HPLC pump (Knauer Azura P 4.1S) was used to pump CH<sub>2</sub>Cl<sub>2</sub> through the reactor system that consisted of one backpressure regulator (PBR, 100 psi), two injections valves (2 position: load and inject, 6-port, 1/16'', Vici) in series, and a packed bed reactor prepared with resin. The exiting fluid was collected in a roundbottomed flask under argon atmosphere, unless otherwise stated. To the two injection valves were connected two loops for loading of reagents: an alcohol loop (0.959 mL) and a PCI/DIPEA loop (2.42 mL).

### Preparation of Packed Bed Reactor

An empty HPLC column of stainless steel (76 mm length, 4.6 mm ID) was filled with **AM-PS-Het5.1** resin (approx. 250 mg, 1.00-1.50 mmol/g, 0.25-0.375 mmol) and sealed.

### Determination of void volume

The internal volume of a freshly prepared packed bed reactor or of an empty sample loop was determined by weighing the freshly prepared packed bed reactor or empty sample loop,  $m_1$ . Then solvent was pumped through the packed bed reactor or sample loop to fill the void with solvent before it was weighed again,  $m_2$ . For our determination we used CH<sub>2</sub>Cl<sub>2</sub> and toluene as the two solvent. The reactor or sample loop void volume,  $V_{\text{void}}$ , was determined by:

$$V_{\text{void}} = \frac{m_2 - m_1}{\Delta\rho_{\text{solvent}}} = \frac{m_{\text{CH}_2\text{Cl}_2 + \text{resin} + \text{column}} - m_{\text{Toluene} + \text{resin} + \text{column}}}{\rho_{\text{CH}_2\text{Cl}_2} - \rho_{\text{Toluene}}} = \frac{43.550 \text{ g} - 43.140 \text{ g}}{1.33 \frac{\text{g}}{\text{mL}} - 0.867 \frac{\text{g}}{\text{mL}}} = 0.890 \text{ mL}$$

The packed bed reactor with  $V_{\text{Void}} = 0.890 \text{ mL}$  was used for all the following studies.

### The flow system

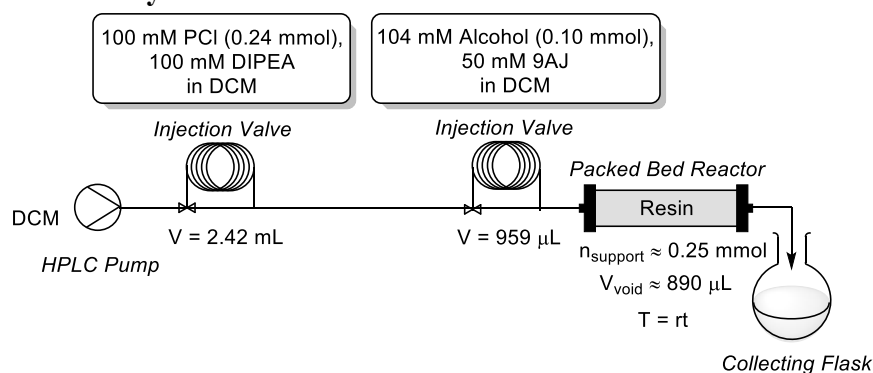

**Figure S2 | Schematics of the flow setup.** Figure by Martin B. Johansen

The total backpressure was usually in the range of 30-60 bar

**Picture of the used flow system.**

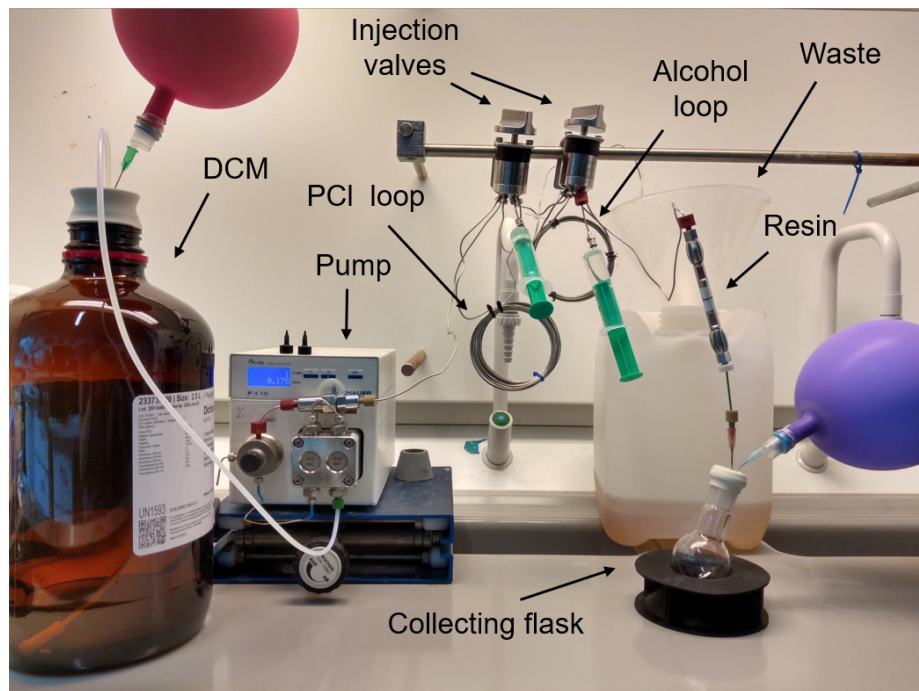

**Figure S3 | Image of the flow setup in a fume hood.** Figure by Alexander F. Sandahl



## PCI stability

A solution of PCI (0.1 M) and DIPEA (0.1 M) in dry DCM was prepared and  $^{31}\text{P}$  NMR spectra were recorded over time.

|                         | Fresh sample | 24 hrs | 96 hrs |
|-------------------------|--------------|--------|--------|
| Amount of PCI remaining | 95%          | 91%    | 83%    |

$^{31}\text{P}$  NMR Spectra of the PCI solution over time

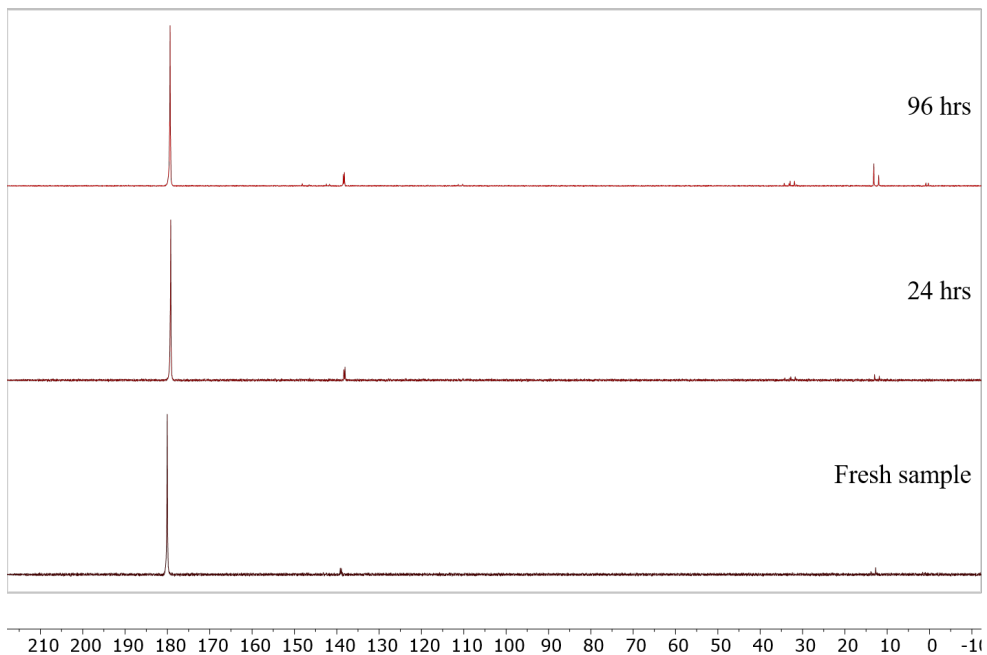

## Diffusion Study

Using the PCI loop, the resin was loaded by elution of PCI (0.10 M, 0.24 mmol) and DIPEA (0.10 M, 0.24 mmol) in CH<sub>2</sub>Cl<sub>2</sub> (2.4 mL) with flow rate of 0.89 mL/min ( $t_R = 1$  min) for 15 mins. Using the Alcohol loop, 5'DMTr-thymidine (0.104 M, 0.10 mmol) and 9AJ (0.05 M, 0.045 mmol) dissolved in CH<sub>2</sub>Cl<sub>2</sub> (0.890 mL) was eluted through the resin with different retention times ( $t_R = 1-3$  mins). Up to 10 fractions were collected each corresponding to 1 void volume. The fractions were then subjected to TLC analysis (EtOAc/pentane = 2/1 + 1% Et<sub>3</sub>N).

TLC analysis of the elution profile when eluting the alcohol through the resin.

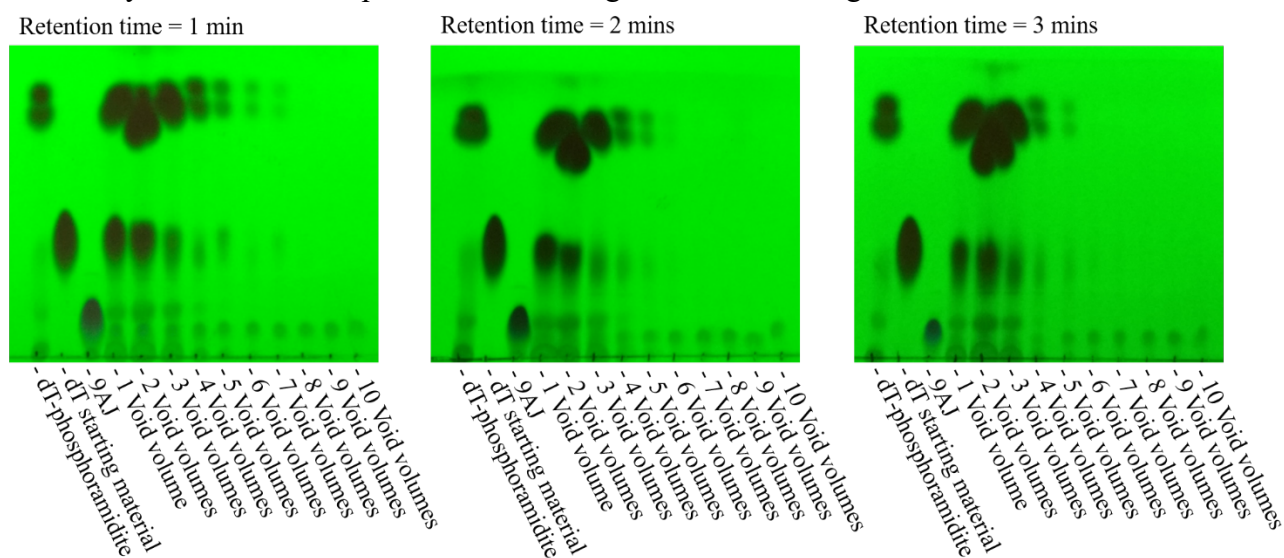

It was concluded that the compounds had eluted after 6 residence times giving a total collection volume of 5.34 mL.

## Concentration Screen of 9AJ

The resin was loaded with PCI/DIPEA (flow rate = 1  $V_{\text{void}}/\text{min}$ , 15 mins including washing step) and 5'DMTr-thymidine (0.10 mmol, 0.104 M, 0.96 mL) and 9AJ (varying concentration) was eluted through the resin (flow rate = 1  $V_{\text{void}}/\text{min}$ , 6 mins) and the eluate was collected in a flask. The eluate was concentrated under reduced pressure and analysed by  $^1\text{H}$  NMR to determine the reaction yield.

**Table S4.** Results of concentration screen

| c(9AJ) | $^1\text{H}$ NMR Yield* / % |
|--------|-----------------------------|
| 5 mM   | 52                          |
| 10 mM  | 60                          |
| 50 mM  | 78                          |
| 75 mM  | 80                          |
| 100 mM | 89                          |

\*Based on product/starting material ratio.

We decided to continue with a concentration of 50 mM 9AJ for the rest of the studies described.

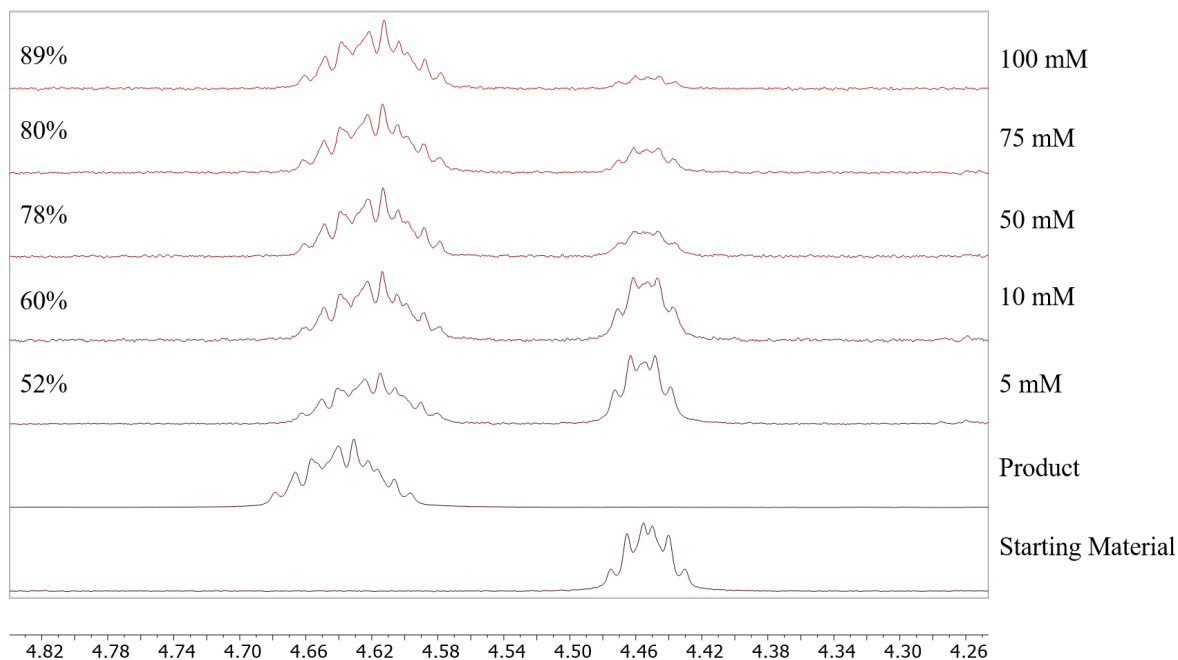

## Synthesis of Starting Material Alcohols

### 2-dmf-2'-Deoxyguanosine

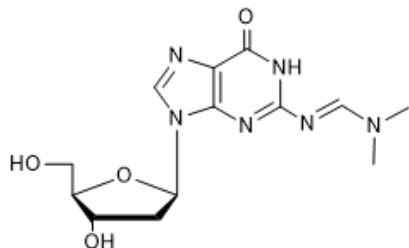

To a solution of 2'-deoxyguanosine (0.50 g, 1.87 mmol, 1.0 equiv.) in dry methanol (6 mL) was added *N,N*-dimethylformamide dimethyl acetal (1 mL, 7.48 mmol, 4.0 equiv.) over 5 mins. The resulting suspension was stirred at 55 °C for 16 hrs. The precipitate was collected by vacuum filtration, and the solid was washed with cold methanol to give the desired compound (520 mg, 1.61 mmol, 86%) as a white solid.

**<sup>1</sup>H NMR (400 MHz, DMSO)** δ<sub>H</sub> (ppm) 11.31 (s, 1H), 8.55 (s, 1H), 8.03 (s, 1H), 6.25 (dd, *J* = 7.81 Hz, 6.20 Hz, 1H), 5.29 (d, *J* = 3.91 Hz, 1H), 4.93 (t, *J* = 5.58 Hz, 1H), 4.39-4.35 (m, 1H), 3.85-3.81 (m, 1H), 3.61-3.47 (m, 2H), 3.16 (s, 3H), 3.03 (s, 3H), 2.63-2.55 (m, 1H), 2.23 (ddd, *J* = 9.03 Hz, 6.13 Hz, 2.87 Hz, 1H).

**<sup>13</sup>C NMR (101 MHz, DMSO)** δ<sub>C</sub> (ppm) 158.0, 157.6, 157.3, 149.6, 136.6, 119.7, 87.7, 82.8, 70.9, 61.8, 40.6, 34.6.

**HRMS (ESI)** *m/z* [M+Na]<sup>+</sup> calc. for C<sub>13</sub>H<sub>18</sub>N<sub>6</sub>O<sub>4</sub>Na<sup>+</sup> 345.1282, found 345.1289

### 2-dmf-5'-DMTr-2'-Deoxyguanosine (dmf-dG)

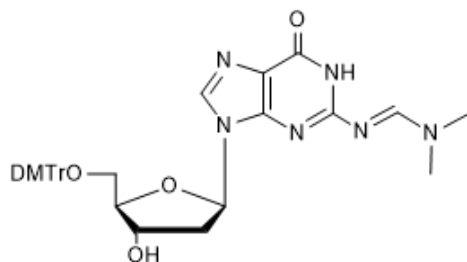

To a solution of 2-dmf-2'-deoxyguanosine (0.50 g, 1.55 mmol, 1.00 equiv.) in pyridine (10 mL) was added DMTrCl (0.630 g, 1.86 mmol, 1.30 equiv.) and the mixture was stirred overnight at rt. The volatiles were removed under reduced pressure and the residue subjected to flash column chromatography (0-5% MeOH in CH<sub>2</sub>Cl<sub>2</sub> + 1% Et<sub>3</sub>N) to give the desired product (0.57 g, 0.91 mmol, 59 %) as a white solid.

**<sup>1</sup>H NMR (400 MHz, CD<sub>3</sub>CN)** δ<sub>H</sub> (ppm) 9.27 (s, 1H), 8.54 (s, 1H), 7.68 (s, 1H), 7.39 (d, *J* = 7.49 Hz, 2H), 7.28-7.21 (m, 8H), 6.83-6.76 (m, 4H), 6.28 (t, *J* = 6.51 Hz, 1H), 4.57-4.51 (m, 1H), 4.02-3.97 (m, 1H), 3.75 (s, 3H), 3.75 (s, 3H), 3.46 (d, *J* = 4.0 Hz, 1H), 3.24 (ddd, *J* = 16.70 Hz, 10.81 Hz, 5.87 Hz, 2H), 3.09 (s, 3H), 3.05 (s, 3H), 2.72 (dt, *J* = 13.22 Hz, 6.36 Hz, 1H), 2.37 (ddd, *J* = 11.40 Hz, 6.73 Hz, 4.66 Hz, 1H)

**<sup>13</sup>C NMR (101 MHz, CD<sub>3</sub>CN)** δ<sub>C</sub> (ppm) 159.6, 159.1, 158.5, 158.2, 151.1, 146.1, 137.3, 136.8, 131.0, 130.9, 129.0, 128.7, 127.8, 121.3, 114.0, 87.1, 86.9, 84.3, 72.3, 65.1, 55.8, 41.5, 40.4, 35.2.

**HRMS (ESI)** *m/z* [M+H]<sup>+</sup> calc. for C<sub>34</sub>H<sub>36</sub>N<sub>6</sub>O<sub>6</sub>H<sup>+</sup> 625.2769, found 625.2780

### Compound 1

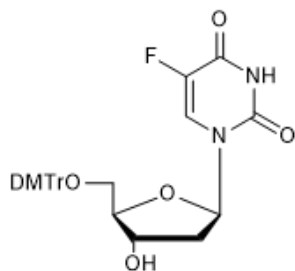

Floxuridine (750 mg, 3.05 mmol, 1.0 eq), DMTr-Cl (1.34 g, 3.96 mmol, 1.3 eq), and DMAP (74 mg, 0.61 mmol, 0.20 eq) were dissolved in pyridine (15 mL) and stirred overnight at rt. The solvent was then removed under reduced pressure and the residue was redissolved in EtOAc (30 mL) and washed with water (30 mL) and brine (30 mL), dried over Na<sub>2</sub>SO<sub>4</sub>, filtered, and concentrated under reduced pressure. The residue was subjected to flash column chromatography (0-5% MeOH in CH<sub>2</sub>Cl<sub>2</sub> + 1% Et<sub>3</sub>N) to give the desired compound (1.256 g, 2.29 mmol, 75%) as a light pink foam.

**<sup>1</sup>H NMR (400 MHz, CD<sub>3</sub>CN)** δ<sub>H</sub> (ppm) 9.27 (broad s, 1H), 7.74 (d, *J* = 6.77 Hz, 1H), 7.43 (d, *J* = 7.20 Hz, 2H), 7.36-7.29 (m, 6H), 7.24 (tt, *J* = 7.18, 2.02 Hz, 1H), 6.86 (dd, *J* = 7.64, 1.27 Hz, 4H), 6.14 (td, *J* = 6.45, 1.67 Hz, 1H), 4.47-4.42 (m, 1H), 3.94 (q, *J* = 4.16 Hz, 1H), 3.77 (s, 6H), 3.39 (broad s, 1H), 3.32 (dd, *J* = 10.74, 4.45 Hz, 1H), 3.24 (dd, *J* = 10.73, 2.97 Hz, 1H), 2.32-2.19 (m, 2H).

**<sup>13</sup>C NMR (100 MHz, CD<sub>3</sub>CN)** δ<sub>C</sub> (ppm) 159.7, 158.1, 157.9, 149.9, 145.9, 142.7, 140.4, 136.8, 136.6, 131.0, 128.9, 127.9, 125.5, 125.2, 114.1, 87.5, 87.1, 86.1, 71.6, 64.3, 55.9, 41.1.

**<sup>19</sup>F NMR (376 MHz, CD<sub>3</sub>CN)** δ<sub>F</sub> (ppm) -168.43.

**HRMS (ESI)** *m/z* [M+Na]<sup>+</sup> calc. for C<sub>30</sub>H<sub>29</sub>FN<sub>2</sub>O<sub>7</sub>Na 571.1851, found 571.1852.

## Compound 4

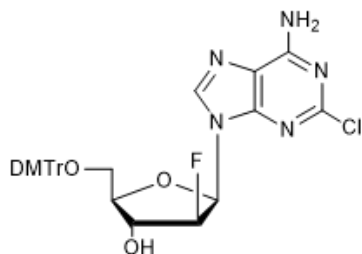

Clofarabine (500 mg, 1.65 mmol, 1.0 eq), DMTr-Cl (642 mg, 1.89 mmol, 1.15 eq) and DMAP (40 mg, 0.33 mmol, 0.20 eq) were dissolved in pyridine (10 mL) and stirred overnight at rt. The solvent was then removed under reduced pressure and the residue was redissolved in EtOAc (25 mL) and washed with water (25 mL) and brine (25 mL), dried over Na<sub>2</sub>SO<sub>4</sub>, filtered and concentrated under reduced pressure. The residue was subjected to flash column chromatography (1/2 - 1/0 EtOAc/pentane + 1% Et<sub>3</sub>N) to give the desired compound (852 mg, 1.40 mmol, 85%) as a white foam.

<sup>1</sup>H NMR (400 MHz, CD<sub>3</sub>CN) δ<sub>H</sub> (ppm) 7.99 (d, *J* = 2.20 Hz, 1H), 7.44 (d, *J* = 7.35 Hz, 2H), 7.35-7.18 (m, 7H), 6.85-6.79 (m, 4H), 6.50 (broad s, 2H), 6.35 (dd, *J* = 15.23, 4.36 Hz, 1H), 5.14 (dt, *J* = 52.23, 4.02 Hz, 1H), 4.55 (d, *J* = 18.56 Hz, 1H), 4.11-4.04 (m, 2H), 3.74 (d, *J* = 1.04 Hz, 6H), 3.44 (dd, *J* = 10.40, 6.45 Hz, 1H), 3.34 (dd, *J* = 10.42, 3.55 Hz, 1H).

<sup>13</sup>C NMR (100 MHz, CD<sub>3</sub>CN) δ<sub>C</sub> (ppm) 159.6, 157.7, 154.8, 151.8, 146.0, 141.4, 141.3, 136.8, 136.8, 131.0, 131.0, 129.0, 128.8, 127.8, 119.0, 114.0, 97.3, 95.3, 87.1, 83.5, 83.4, 83.3, 83.1, 75.2, 74.9, 64.2, 55.9.

<sup>19</sup>F NMR (376 MHz, CD<sub>3</sub>CN) δ<sub>F</sub> (ppm) -199.04.

HRMS (ESI) *m/z* [M+H]<sup>+</sup> calc. for C<sub>31</sub>H<sub>30</sub>ClFN<sub>5</sub>O<sub>5</sub> 606.1914, found 606.1923.

## Compound 4.1

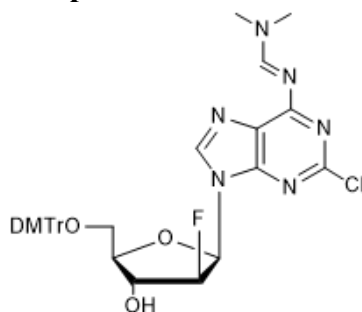

Compound 4 (780 mg, 1.29 mmol, 1.0 eq) was dissolved in dry MeOH (20 mL) and *N,N*-dimethylformamide dimethyl acetal (0.857 mL, 6.44 mmol, 5.0 eq) was added and the mixture was stirred overnight at rt. The mixture was then diluted with EtOAc (50 mL) and washed 5 times with water (50 mL), brine (50 mL), dried over Na<sub>2</sub>SO<sub>4</sub>, filtered and concentrated under reduced pressure to give the desired compound (851 mg, 1.29 mmol, quant.) as a white foam.

**<sup>1</sup>H NMR (400 MHz, CD<sub>3</sub>CN)** δ<sub>H</sub> (ppm) 8.87 (s, 1H), 8.03 (d, *J* = 2.32 Hz, 1H), 7.43 (d, *J* = 7.11 Hz, 2H), 7.35-7.19 (m, 7H), 6.85-6.80 (m, 4H), 6.38 (dd, *J* = 15.42, 4.37 Hz, 1H), 5.16 (dt, *J* = 52.07 Hz, 4.28 Hz, 1H), 4.57 (d, *J* = 18.55 Hz, 1H), 4.12-4.06 (m, 2H), 3.75 (d, *J* = 1.60 Hz, 6H), 3.42 (dd, *J* = 10.43, 6.42 Hz, 1H) 3.33 (dd, *J* = 10.87, 3.53 Hz, 1H), 3.19 (s, 3H), 3.16 (s, 3H).

**<sup>13</sup>C NMR (100 MHz, CD<sub>3</sub>CN)** δ<sub>C</sub> (ppm) 161.7, 159.7, 159.7, 154.3, 153.7, 146.0, 142.3, 142.3, 136.8, 136.8, 131.0, 131.0, 129.0, 128.8, 127.9, 125.5, 114.0, 97.3, 95.4, 87.1, 83.5, 83.5, 83.2, 83.1, 75.2, 75.0, 64.2, 55.9, 41.8, 35.5.

**<sup>19</sup>F NMR (376 MHz, CD<sub>3</sub>CN)** δ<sub>F</sub> (ppm) -199.0.

**HRMS (ESI)** *m/z* [M+H]<sup>+</sup> calc. for C<sub>34</sub>H<sub>35</sub>ClFN<sub>6</sub>O<sub>5</sub> 661.2336, found 661.2339.

### Compound 5

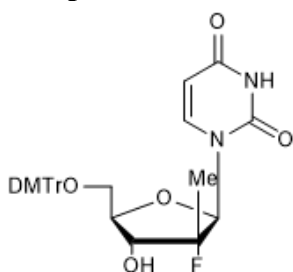

(2'*R*)-2'-Deoxy-2'-fluoro-2'-methyluridine (300 mg, 1.15 mmol, 1.0 eq), DMTrCl (508 mg, 1.50 mmol, 1.3 eq) and DMAP (28 mg, 0.23 mmol, 0.20 eq) were dissolved in pyridine (7 mL) and stirred overnight at rt. The solvent was then removed under reduced pressure and the residue was redissolved in EtOAc (25 mL) and washed with water (25 mL) and brine (25 mL), dried over Na<sub>2</sub>SO<sub>4</sub>, filtered and concentrated under reduced pressure. The residue was subjected to flash column chromatography (1/2 - 1/0 EtOAc/pentane + 1% Et<sub>3</sub>N) to give the desired compound (444 mg, 0.80 mmol, 69%) as a white foam.

**<sup>1</sup>H NMR (400 MHz, CD<sub>3</sub>CN)** δ<sub>H</sub> (ppm) 9.12 (s, 1H), 7.86 (d, *J* = 8.15 Hz, 1H), 7.44 (d, *J* = 7.23 Hz, 2H), 7.36-7.25 (m, 7H), 6.90 (d, *J* = 8.73 Hz, 4H), 6.05 (d, *J* = 18.69 Hz, 1H), 5.12 (d, *J* = 8.17 Hz, 1H), 4.17 (dt, *J* = 24.07, 9.17 Hz, 1H), 4.01 (d, *J* = 9.68 Hz, 1H), 3.77 (s, 6H), 3.62 (d, *J* = 8.38 Hz, 1H), 3.48-3.43 (m, 2H), 1.37 (d, *J* = 10.82 Hz, 3H).

**<sup>13</sup>C NMR (100 MHz, CD<sub>3</sub>CN)** δ<sub>C</sub> (ppm) 163.8, 159.8, 159.8, 151.5, 145.8, 136.6, 136.3, 131.2, 131.1, 129.1, 129.0, 128.1, 114.2, 114.2, 103.0, 102.8, 101.0, 87.7, 81.5, 72.8, 72.6, 61.8, 55.9, 17.0, 16.8.

**<sup>19</sup>F NMR (376 MHz, CD<sub>3</sub>CN)** δ<sub>F</sub> (ppm) -162.34.

**HRMS (ESI)** *m/z* [M+H]<sup>+</sup> calc. for C<sub>31</sub>H<sub>32</sub>FN<sub>2</sub>O<sub>7</sub>, 563.2188, found 563.2189.

### Compound 6

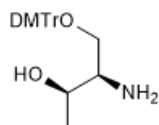

Compound **6** was prepared according to previously published procedures and data are consistent with reported values<sup>4</sup>

### Compound 6.1

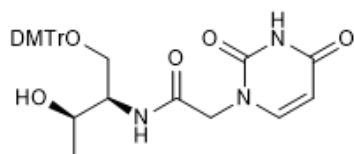

To a stirred solution of uracil acetic acid (2.29 g, 13.5 mmol, 1 equiv.), **6** (6.06 g, 14.9 mmol, 1.1 equiv.) and DIPEA (4.8 mL, 27.6 mmol, 2 equiv.) in dry DMF (48 mL) was added HBTU (7.69 g, 20.3 mmol, 1.5 equiv.) under argon atmosphere. The reaction stirred at rt overnight. The reaction mixture was diluted with EtOAc and washed with water followed by drying over Na<sub>2</sub>SO<sub>4</sub> where after the solvent was evaporated *in vacuo*. The compound was purified by flash chromatography (0 – 3% MeOH in CH<sub>2</sub>Cl<sub>2</sub>+ 1% Et<sub>3</sub>N) to yield a white foam (4.50 g, 8.04 mmol, 60%).

**<sup>1</sup>H NMR (400 MHz, *d6*-DMSO)** δ<sub>H</sub> (ppm) 11.27 (s, 1H), 8.00 – 7.97 (d, *J* = 9.2 Hz, 1H), 7.53 – 7.51 (d, *J* = 8.0 Hz, 1H), 7.39 – 7.19 (m, 9H), 6.90 – 6.87 (m, 4H), 5.56 – 5.53 (dd, *J* = 7.6, 2.0 Hz, 1H), 4.62 – 4.61 (d, *J* = 4.4 Hz, 1H), 4.41 (s, 2H), 3.94 – 3.87 (m, 2H), 3.73 (s, 6H), 2.88 – 2.85 (m, 1H), 0.96 – 0.95 (d, *J* = 6.4 Hz, 3H)

**<sup>13</sup>C NMR (100 MHz, *d6*-DMSO)** δ<sub>C</sub> (ppm) 170.8, 167.4, 164.4, 158.4, 151.4, 147.3, 145.5, 136.2, 130.2, 128.2, 127.0, 113.6, 100.7, 85.6, 65.3, 63.2, 60.2, 55.5, 54.7, 49.9, 46.2, 21.2, 20.7, 14.6, 9.1

**HRMS (ESI)** *m/z* [M+Na]<sup>+</sup> calc. for C<sub>31</sub>H<sub>33</sub>N<sub>3</sub>O<sub>7</sub>Na 582.2216, found 582.2211.

### Compound 8

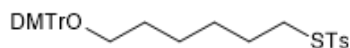

1,6-Hexanediol (17.4 g, 148 mmol, 10 eq) and triethylamine (2.26 mL, 16.2 mmol, 1.1 eq) were dissolved in THF (100 mL) and DMTr-Cl (5.00 g, 14.8 mmol, 1.0 eq) was added. The mixture was stirred at rt overnight. Et<sub>2</sub>O (200 mL) was added and the organic phase was washed 3 times with water (100 mL) and once with brine (100 mL), dried over Na<sub>2</sub>SO<sub>4</sub>, filtered and concentrated under reduced pressure. The residue was dissolved in CH<sub>2</sub>Cl<sub>2</sub> (50 mL) and cooled in an ice bath. *N*-Methyl morpholine (5.67 mL, 51.6 mmol, 3.5 eq) was added along with MsCl (1.37 mL, 17.7 mmol, 1.2 eq) and the mixture was stirred at 0 °C for 30 mins whereafter the reaction mixture



was allowed to warm to rt and stirred overnight. The reaction was quenched with water (50 mL) and the phases were separated. The organic phase was washed twice with water (50 mL), once with brine (50 mL) and then dried over Na<sub>2</sub>SO<sub>4</sub>, filtered and concentrated under reduced pressure. The residue was dissolved in MeCN (50 mL) along with potassium *p*-toluenethiosulphonate (4.12 g, 18.2 mmol, 1.23 eq) and the mixture was stirred at 75 °C overnight. The mixture was then diluted with Et<sub>2</sub>O and washed with water and brine, dried over Na<sub>2</sub>SO<sub>4</sub>, filtered and concentrated under reduced pressure. The residue was purified with flash column chromatography (3/1 – 0/1 pentane/ CH<sub>2</sub>Cl<sub>2</sub> gradient + 1% Et<sub>3</sub>N) to give the desired compound (5.507 g, 9.32 mmol, 63% for 3 steps) as a clear oil.

**<sup>1</sup>H NMR (400 MHz, CDCl<sub>3</sub>)** δ<sub>H</sub> (ppm) 7.77 (d, *J* = 8.29 Hz, 2H), 7.40 (d, *J* = 7.20 Hz, 2H), 7.32-7.23 (m, 8H), 7.18 (t, *J* = 7.20 Hz, 1H), 6.82 (d, *J* = 8.84 Hz, 4H), 3.77 (s, 6H), 2.99 (t, *J* = 6.43 Hz, 2H), 2.94 (t, *J* = 7.38 Hz, 2H), 2.41 (s, 3H), 1.59-1.48 (m, 4H), 1.33-1.19 (m, 4H).

**<sup>13</sup>C NMR (100 MHz, CDCl<sub>3</sub>)** δ<sub>C</sub> (ppm) 158.5, 145.5, 144.7, 142.3, 136.8, 130.1, 129.9, 128.3, 127.8, 127.1, 126.7, 113.1, 85.8, 63.2, 55.3, 36.1, 29.9, 28.7, 28.5, 25.8, 21.7.

**HRMS (ESI)** *m/z* [M-K]<sup>+</sup> calc. for C<sub>34</sub>H<sub>38</sub>O<sub>5</sub>S<sub>2</sub>K 629.1792, found 629.1785.

### Compound 8.1

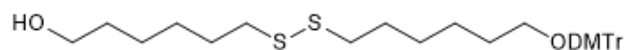

Compound **8** (484 mg, 819 μmol, 1.1 eq) was dissolved in CH<sub>2</sub>Cl<sub>2</sub> (10 mL) and triethylamine (156 μL, 1.12 mmol, 1.5 eq) was added. 6-Mercapto-1-hexanol (102 μL, 745 μmol, 1.0 eq) was added and the mixture was stirred for 30 mins at rt. The solvent was then removed under reduced pressure and the residue was subjected to flash column chromatography (1/3 – 1/0 Et<sub>2</sub>O/pentane + 1% Et<sub>3</sub>N) to give the desired compound (396 mg, 693 μmol, 93%) as a clear oil.

**<sup>1</sup>H NMR (400 MHz, CD<sub>3</sub>CN)** δ<sub>H</sub> (ppm) 7.42 (d, *J* = 7.38 Hz, 2H), 7.32-7.26 (m, 6H), 7.21 (t, *J* = 7.21 Hz, 1H), 6.86 (d, *J* = 8.86 Hz, 4H), 3.76 (s, 6H), 3.45 (q, *J* = 5.50 Hz, 2H), 3.00 (t, *J* = 6.46 Hz, 2H), 2.68 (q, *J* = 7.45 Hz, 4H), 2.46 (t, *J* = 5.33 Hz, 1H), 1.69-1.54 (m, 6H), 1.50-1.43 (m, 2H), 1.40-1.27 (m, 8H).

**<sup>13</sup>C NMR (100 MHz, CD<sub>3</sub>CN)** δ<sub>C</sub> (ppm) 159.5, 146.7, 137.6, 130.9, 129.0, 128.7, 127.6, 113.9, 86.5, 64.0, 62.5, 55.9, 39.5, 33.5, 30.5, 29.9, 29.8, 29.0, 28.8, 26.6, 26.2.

**HRMS (ESI)** *m/z* [M+Na]<sup>+</sup> calc. for C<sub>33</sub>H<sub>44</sub>O<sub>4</sub>S<sub>2</sub>Na 591.2573, found 591.2570.

## Compound 9

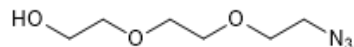

Potassium hydroxide (1.77 g, 31.47 mmol, 4.00 eq.) was added portionwise to a cooled (0 °C) solution of triethylene glycol (21.5 mL, 157 mmol, 20.0 eq.) and p-toluenesulfonyl chloride (1.50 g, 7.87 mmol, 1.00 eq.) in CH<sub>2</sub>Cl<sub>2</sub> (25 mL). The reaction mixture was stirred for 3 hrs at 0 °C. Water (40 mL) was then added and the aqueous phase was extracted with CH<sub>2</sub>Cl<sub>2</sub> (2 × 25 mL) and the organic phase was washed with water (40 mL) and brine (30 mL), dried over Na<sub>2</sub>SO<sub>4</sub> and concentrated under reduced pressure to afford a yellow oil. Without further purification, the resulting residue was dissolved in 15 mL *N,N*-dimethylformamide and sodium azide (0.72 g, 11.0 mmol, 1.4 equiv.) was added. The resulting mixture was stirred at 80 °C for 16 hours. The solvent was removed under reduced pressure and the residue was subjected to flash column chromatography (0-5% MeOH in CH<sub>2</sub>Cl<sub>2</sub>) to give the desired product (1.03 g, 5.71 mmol, 73 %) as a colorless oil.

**<sup>1</sup>H NMR (400 MHz, CD<sub>3</sub>CN)** δ<sub>H</sub> (ppm) 3.66-3.55 (m, 8H), 3.49 (t, *J* = 5.11 Hz, 2H), 3.37 (t, *J* = 4.86 Hz, 2H), 2.78 (s, broad, 1H)

**<sup>13</sup>C NMR (101 MHz, CD<sub>3</sub>CN)** δ<sub>C</sub> (ppm) 73.3, 71.1, 71.0, 70.5, 61.9, 51.5

**HRMS (ESI)** *m/z* [M+H]<sup>+</sup> calc. for C<sub>6</sub>H<sub>13</sub>N<sub>3</sub>O<sub>3</sub>H<sup>+</sup> 176.1030, found 176.1033

## Residence Time Study

The synthetic cycle used for screening of residence times is described in Table S5. The eluate was collected for 6 residence times and concentrated under reduced pressure. The crude mixtures were analysed  $^1\text{H}$  and  $^{19}\text{F}$  NMR (if possible) spectroscopy. The yields were calculated by  $^1\text{H}$  NMR or  $^{19}\text{F}$  NMR (if possible) integration of non-overlapping signals between starting material and product. If not commercially available, the products were synthesised according to the procedure included here (S79-S83). Results are given in Table S6. It should be noted that for compound **2** the integration from  $^{13}\text{C}\text{H}\text{D}_2\text{CN}$  overlaps with the starting material giving 0.55% additional integral of the residual solvent peak. This has been subtracted. Furthermore, compound **6** produces the product in 1:2 mixture of the 2 phosphoramidite diastereomers when eluted through the P(III)-loaded resin. When the reference product was synthesized by conventional batch method another ratio was isolated of the diastereomers giving a difference between the stacked NMR spectra.

**Table S5.** Summary of synthetic cycle.

| Cycle step | Reagent(s)                                                           | Injection volume | Residence time (flow rate) | Time              |
|------------|----------------------------------------------------------------------|------------------|----------------------------|-------------------|
| Loading    | 0.1 M PCl, 0.1 M DIPEA in $\text{CH}_2\text{Cl}_2$                   | 2.4 mL           | 1 min (0.89 mL/min)        | 10 mins           |
| Wash       | $\text{CH}_2\text{Cl}_2$                                             |                  | 1 min (0.89 mL/min)        | 5 mins            |
| Transfer   | 0.104 M Alcohol (0.10 mmol), 0.050 M 9AJ in $\text{CH}_2\text{Cl}_2$ | 0.96 mL          | Substrate dependent        | 6 residence times |

Below is depicted the proposed reasoning for effect observed by changing protecting group of guanosine. Isobutyryl protection allows internal hydrogen bond to 5'-OH thus changing the ribose conformation to 3'-endo giving an equatorial 3'-OH. Without the hydrogen bond donor the nucleobase would have an anti orientation thus giving a 2'-endo conformation of the ribose and an axial and less nucleophilic 3'-OH.

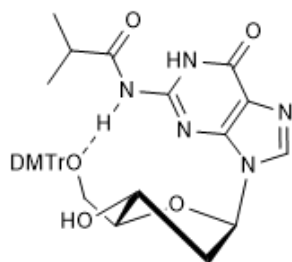

Equatorial 3'-OH

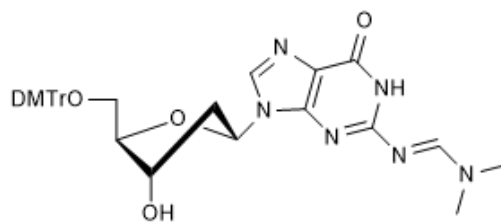

Axial 3'-OH

**Table S6.** Summary of results from residence time study given as distributions between phosphoramidite product and starting material. Values  $\geq 98\%$  have been marked light green.

| Alcohol  | Residence time |        |        |        |        |        | <sup>31</sup> P NMR purity* | <sup>31</sup> P NMR purity** |
|----------|----------------|--------|--------|--------|--------|--------|-----------------------------|------------------------------|
|          | 1 min          | 2 mins | 3 mins | 4 mins | 5 mins | 6 mins |                             |                              |
| Bz-dA    | 78%            | 95%    | 99%    | 100%   |        |        | 81.0%                       | 96.9%                        |
| dT       | 76%            | 81%    | 88%    | 98%    | 100%   |        | 88.9%                       | 94.9%                        |
| iBu-dG   | 100%           |        |        |        |        |        | 72.1%                       | 93.5%                        |
| dmf-dG   | 69%            | 90%    | 96%    | 100%   |        |        | 72.6%                       | 81.2%                        |
| Bz-dC    | 72%            | 88%    | 92%    | 97%    | 97%    | 98%    | 93.3%                       | 97.6%                        |
| <b>1</b> | 90%            | 99%    | 100%   |        |        |        | 93.3%                       | 98.0%                        |
| <b>2</b> | 74%            | 90%    | 94%    | >99%   |        |        | 90.2%                       | 97.7%                        |
| <b>3</b> | 71%            | 88%    | 99%    | 100%   |        |        | 92.6%                       | 98.8%                        |
| <b>4</b> | 72%            | 86%    | 92%    | 95%    | 98%    | 99%    | 93.9%                       | 98.5%                        |
| <b>5</b> | 59%            | 90%    | 91%    | 95%    | 98%    |        | 94.9%                       | 98.9%                        |
| <b>6</b> | 100%           |        |        |        |        |        | 91.6%                       | 97.5%                        |
| <b>7</b> | 100%           |        |        |        |        |        | 92.3%                       | 96.0%                        |
| <b>8</b> | 100%           |        |        |        |        |        | 91.1%                       | 96.3%                        |
| <b>9</b> | 100%           |        |        |        |        |        | 91.1%                       | 94.5%                        |

\*With lowest residence time where phosphoramidite/starting material distribution  $\geq 98\%$

\*\* Not counting the hydrolysis sideproduct at 13.8 ppm

Bz-dA,  $^1\text{H}$  NMR ( $\text{CD}_3\text{CN}$ )

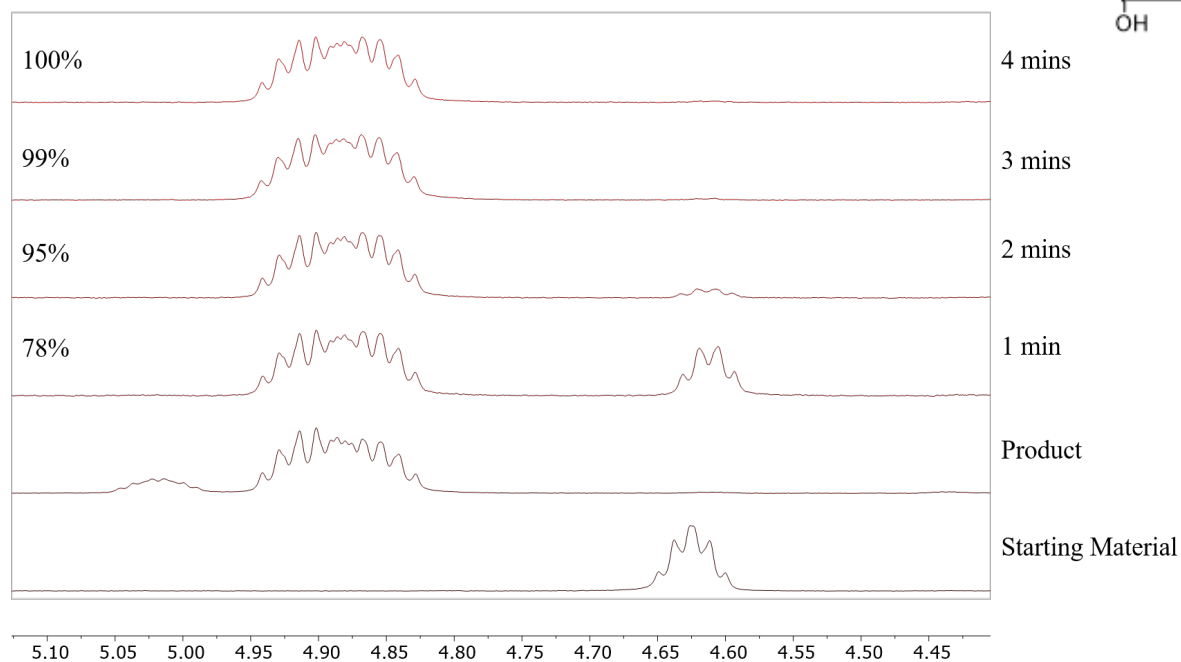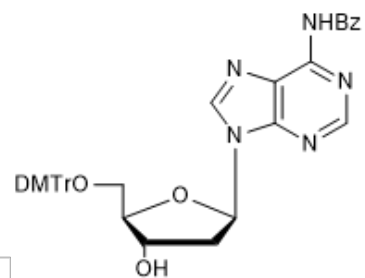

dT,  $^1\text{H}$  NMR ( $\text{CD}_3\text{CN}$ )

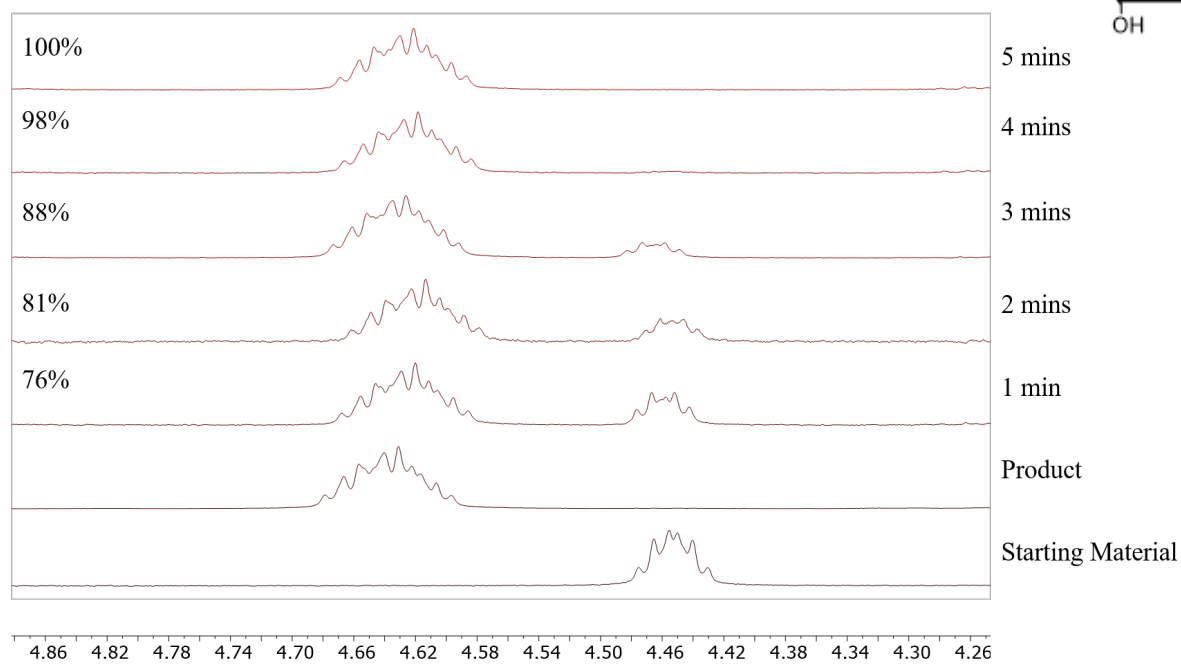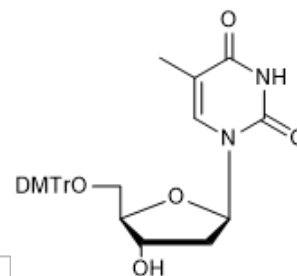

iBu-dG,  $^1\text{H}$  NMR ( $\text{CD}_3\text{CN}$ )

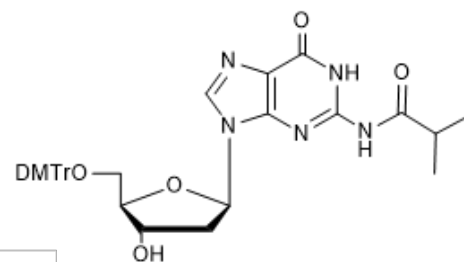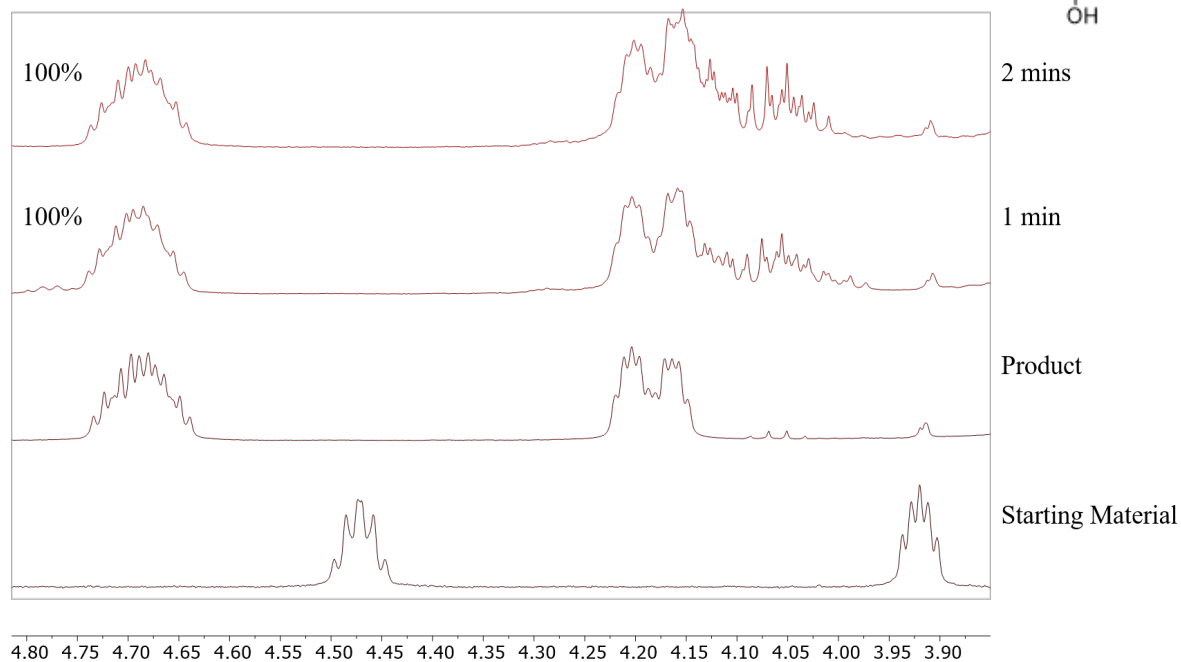

Bz-dC,  $^1\text{H}$  NMR ( $\text{CD}_3\text{CN}$ )

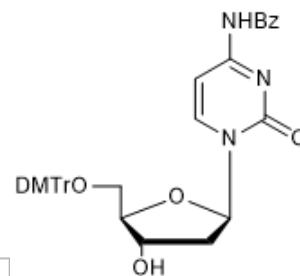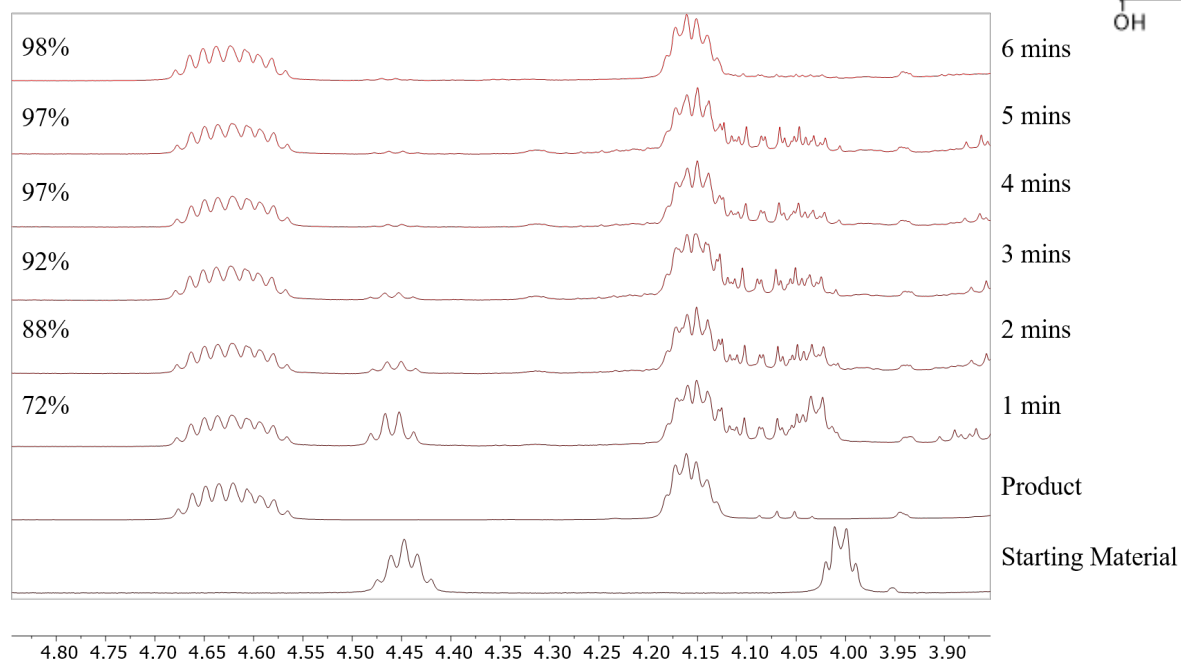

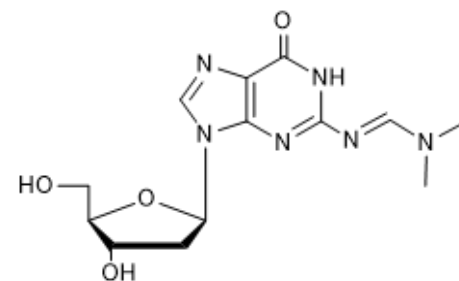

dmf-dG,  $^1\text{H}$  NMR ( $\text{CD}_3\text{CN}$ )

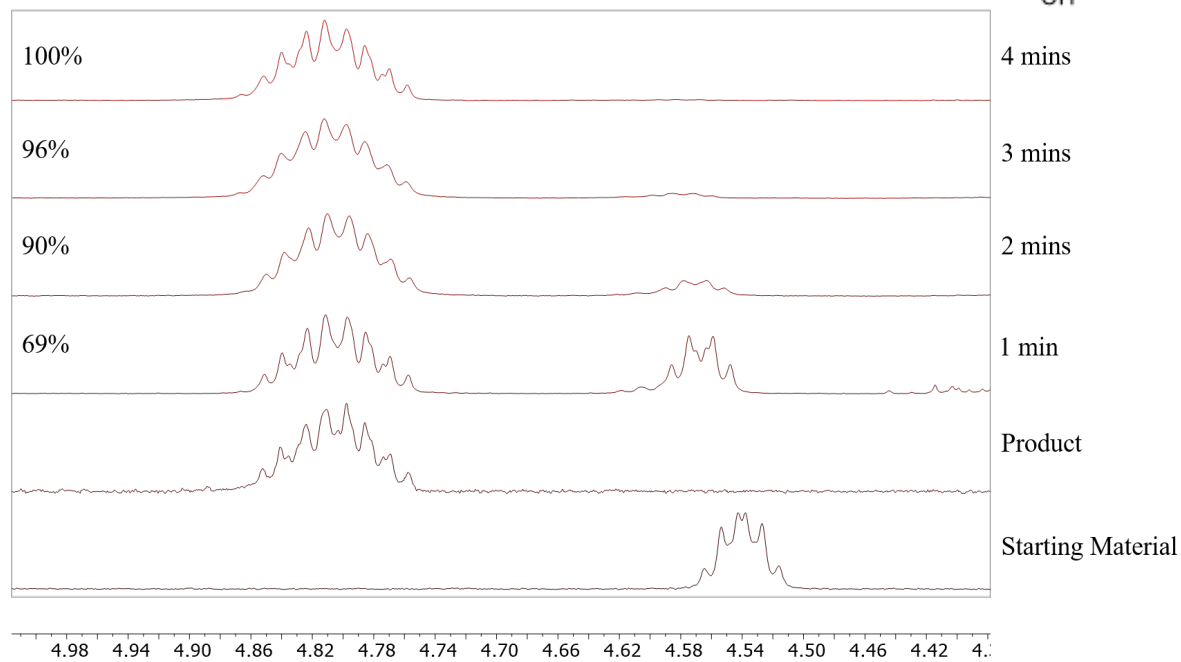

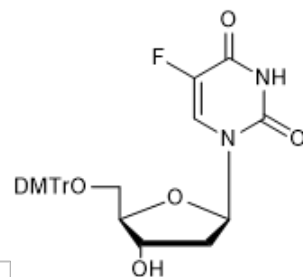

Compound **1**,  $^1\text{H}$  NMR ( $\text{CD}_3\text{CN}$ )

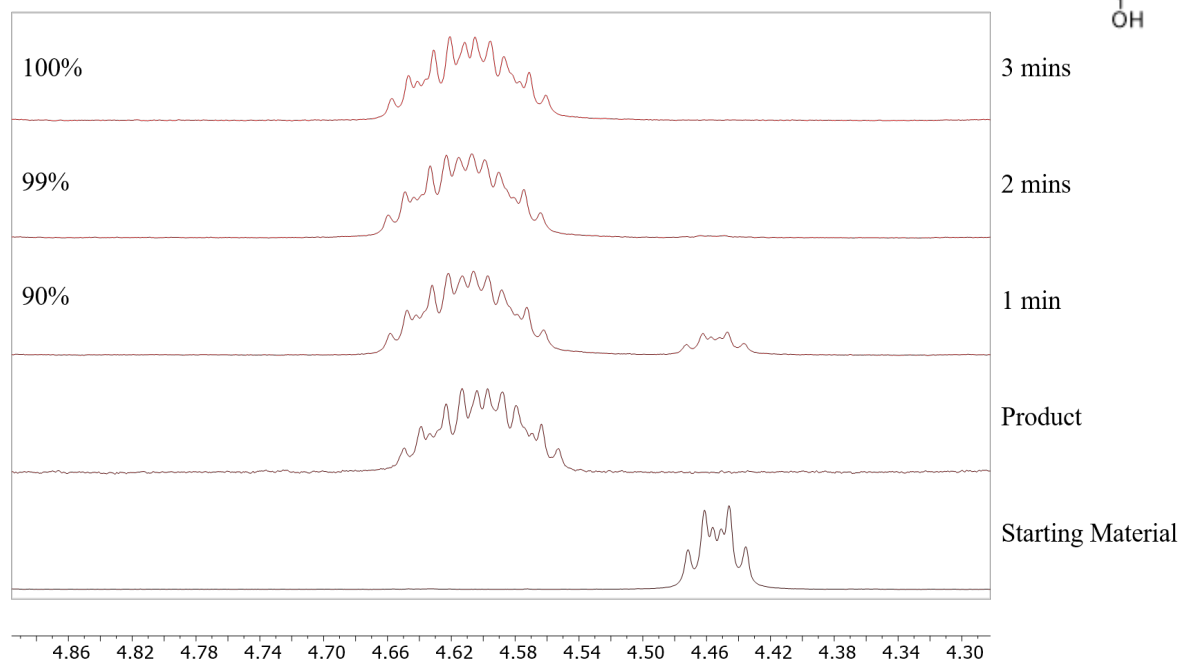

Compound **1**,  $^{19}\text{F}$  NMR ( $\text{CD}_3\text{CN}$ )

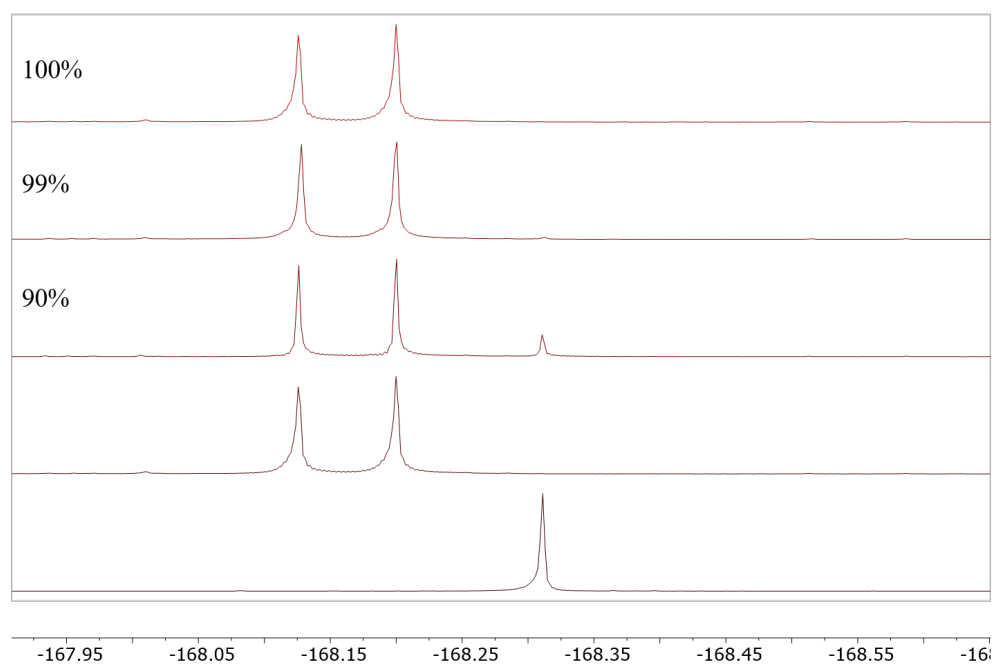



Compound 2, <sup>1</sup>H NMR (CD<sub>3</sub>CN)

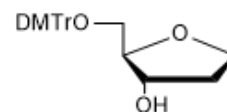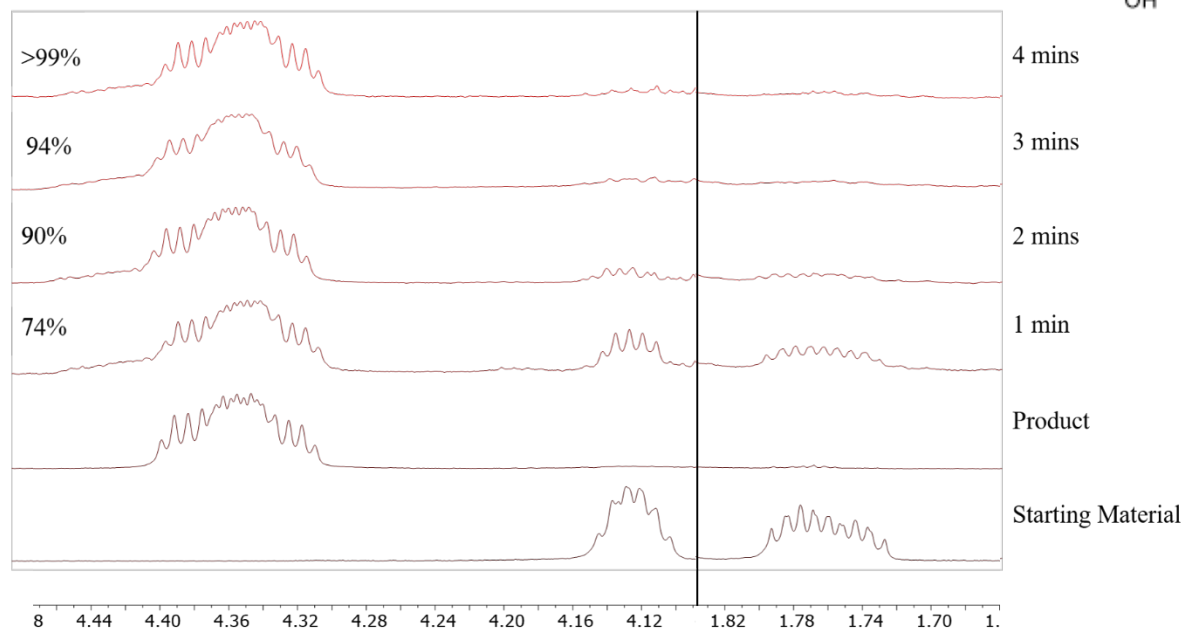

Compound 3, <sup>1</sup>H NMR (CD<sub>3</sub>CN)

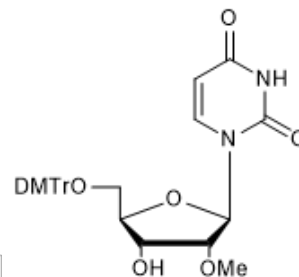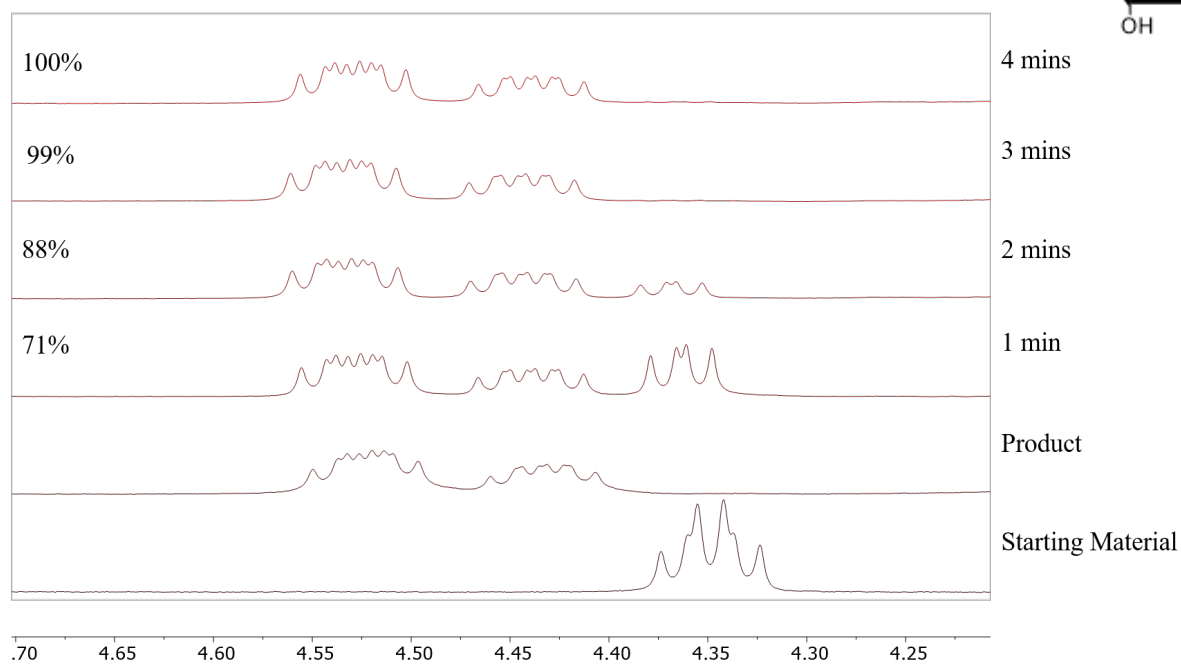

Compound 4,  $^1\text{H}$  NMR ( $\text{CD}_3\text{CN}$ )

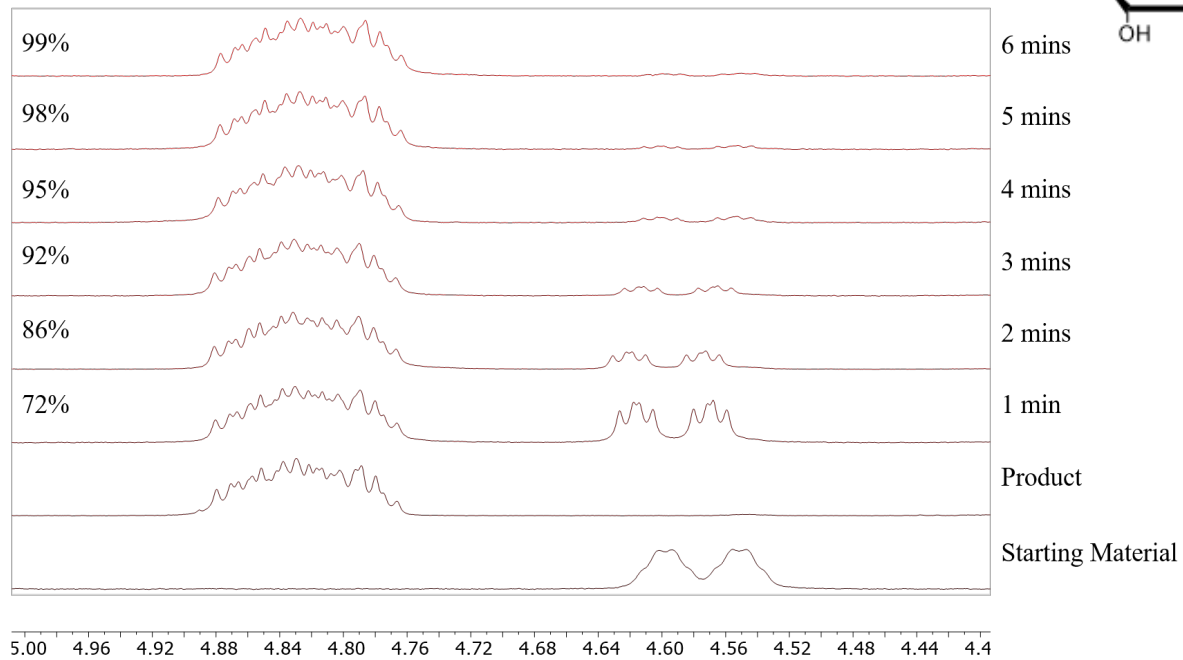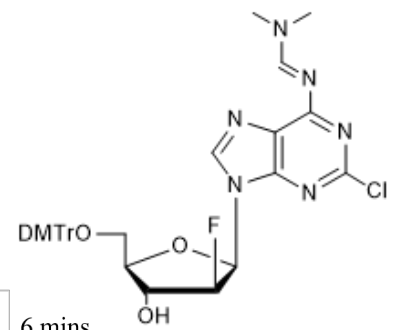

Compound 4,  $^{19}\text{F}$  NMR ( $\text{CD}_3\text{CN}$ )

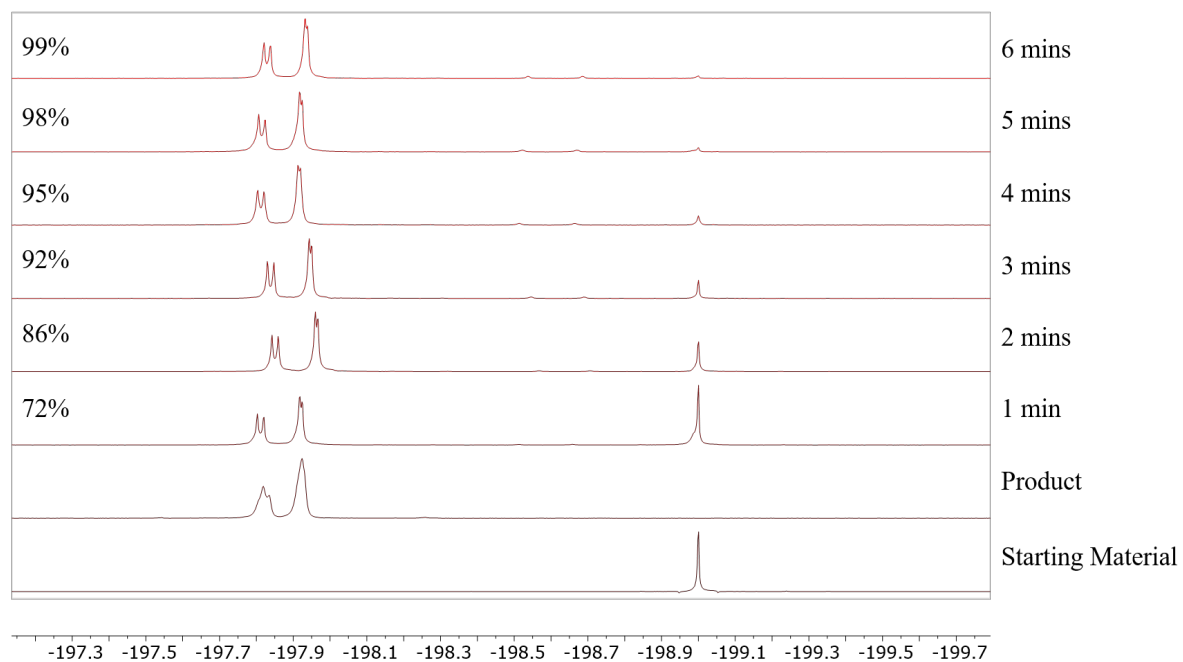

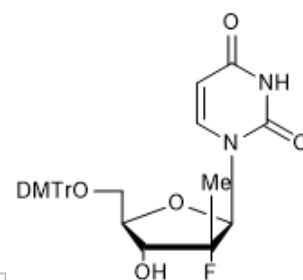

Compound **5**,  $^1\text{H}$  NMR ( $\text{CD}_3\text{CN}$ )

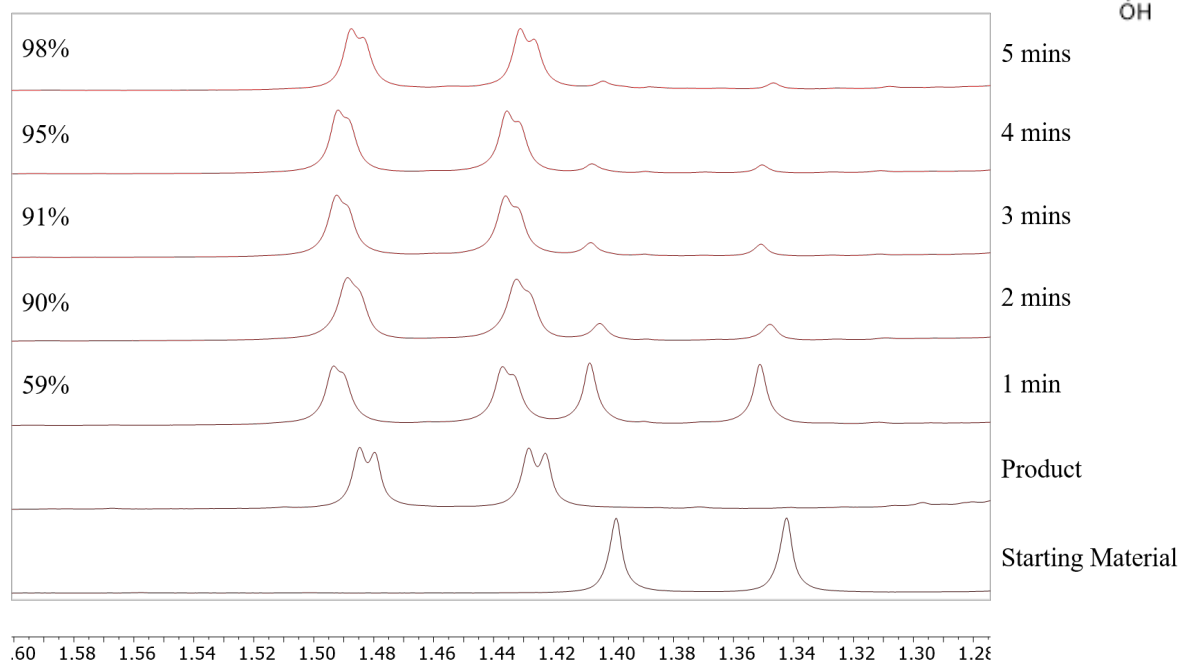

Compound **5**,  $^{19}\text{F}$  NMR ( $\text{CD}_3\text{CN}$ )

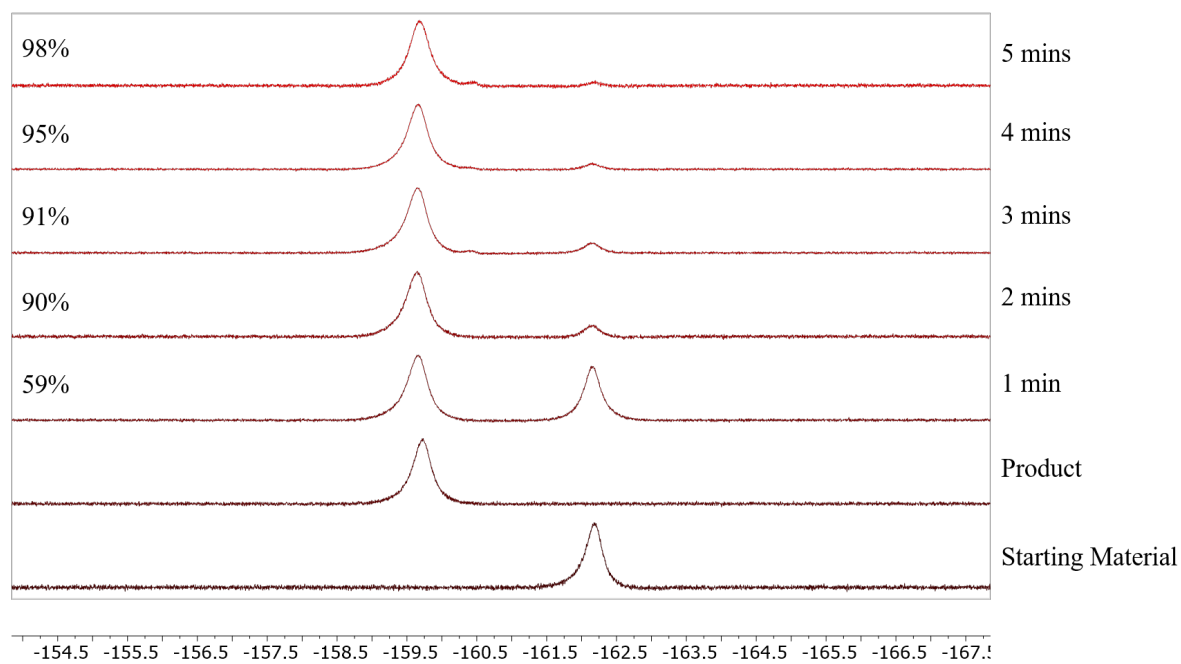

Compound 6,  $^1\text{H}$  NMR ( $\text{CD}_3\text{CN}$ )

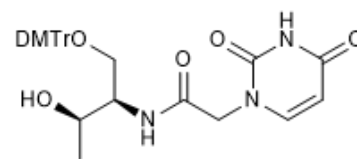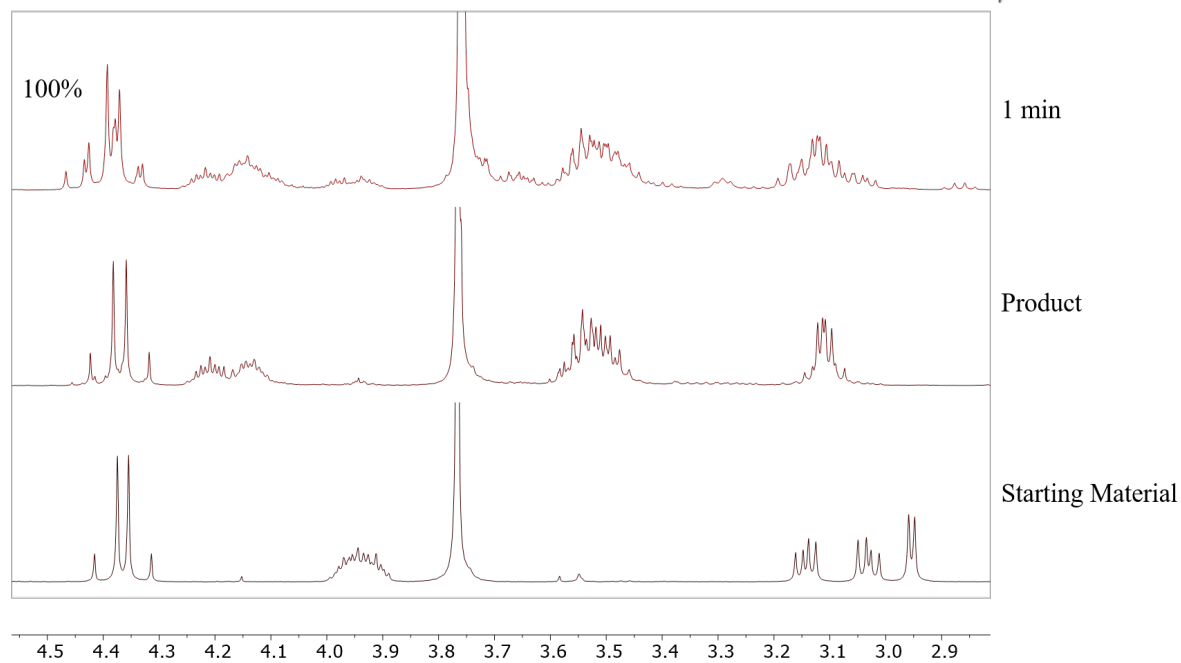

Compound 7,  $^1\text{H}$  NMR ( $\text{CD}_3\text{CN}$ )

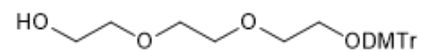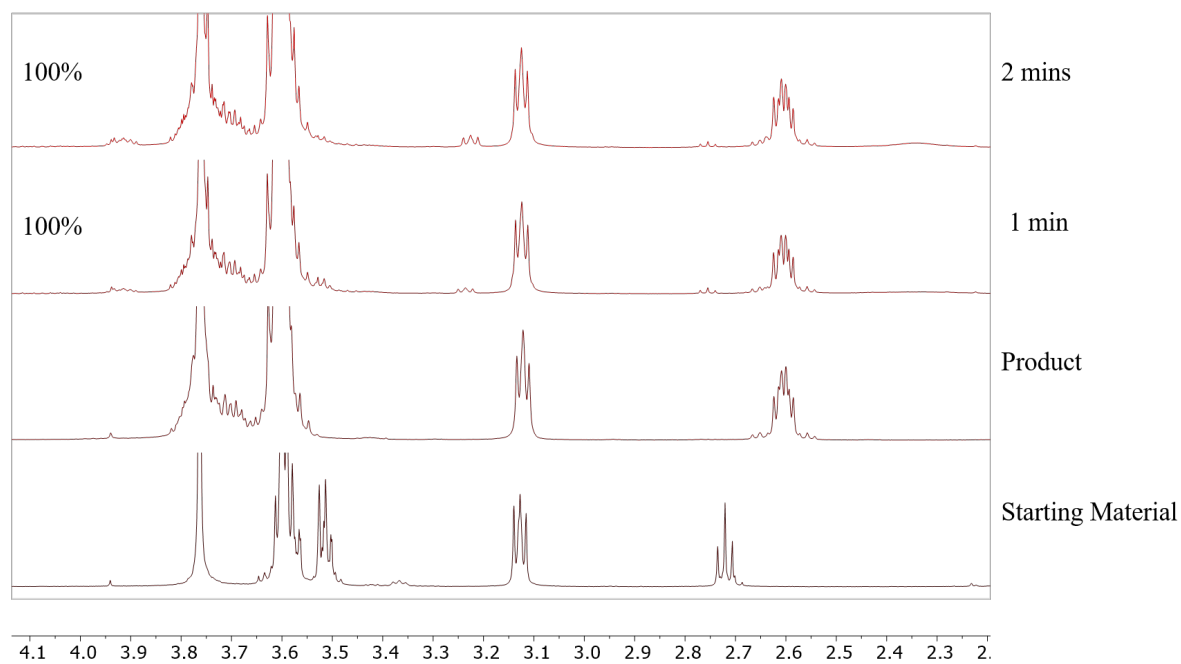

Compound **8**,  $^1\text{H}$  NMR ( $\text{CD}_3\text{CN}$ )

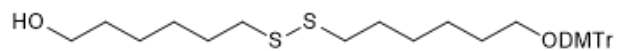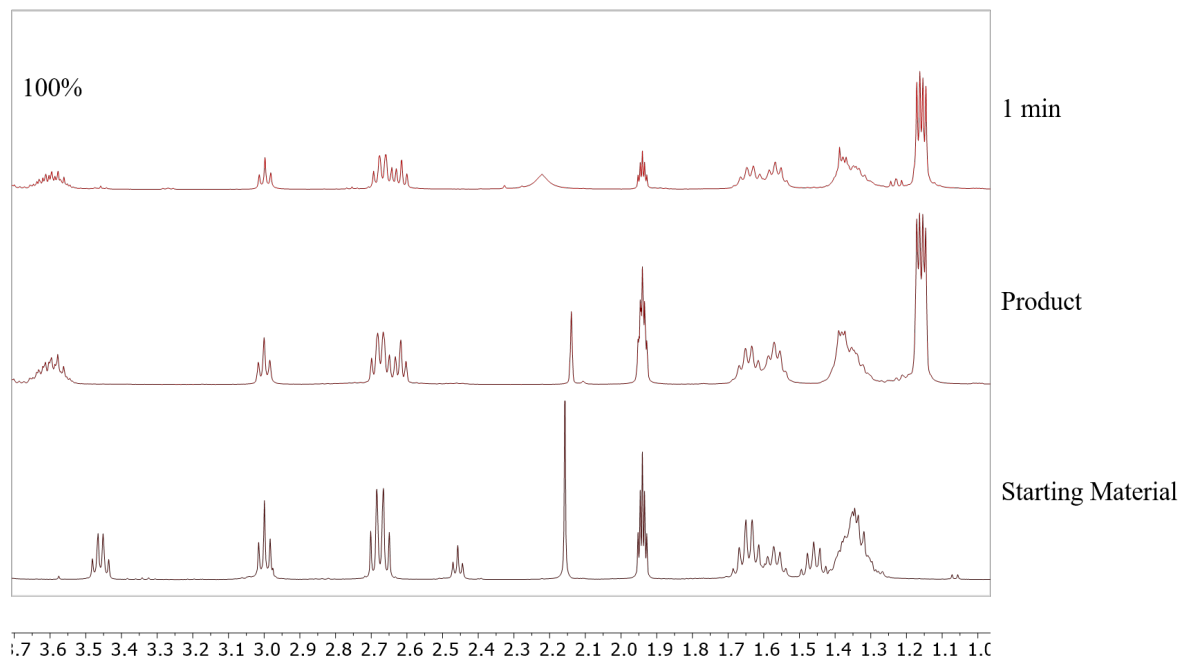

Compound **9**,  $^1\text{H}$  NMR ( $\text{CD}_3\text{CN}$ )

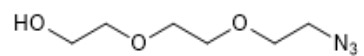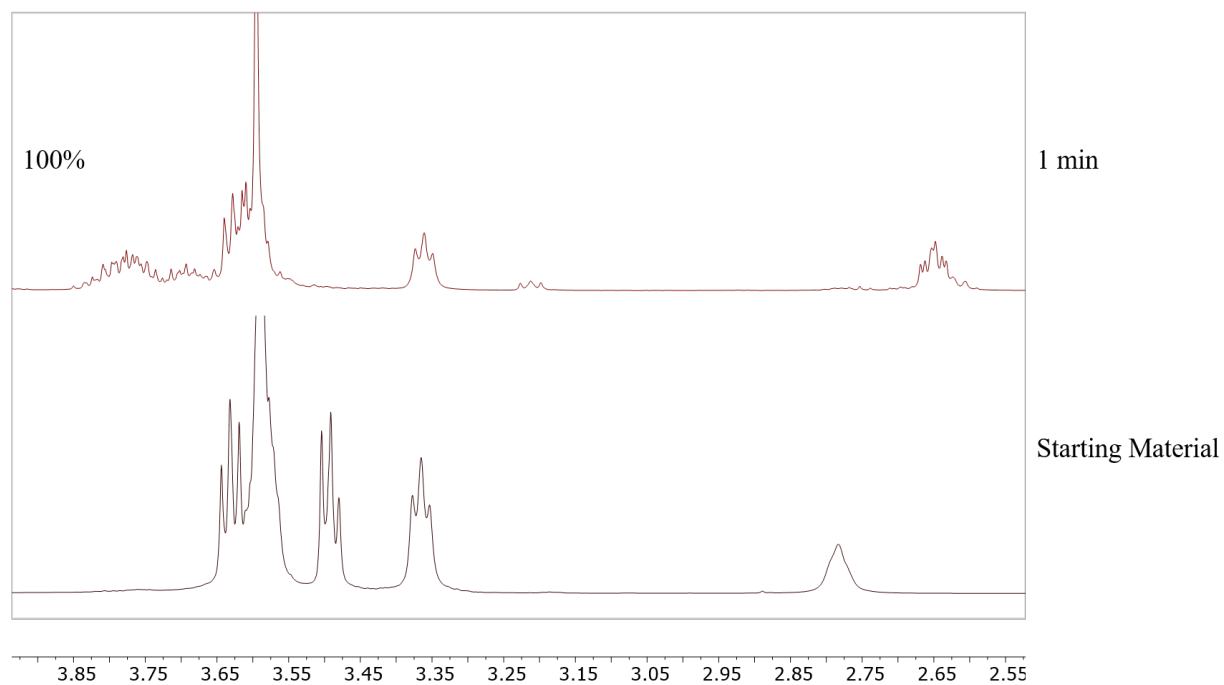

## Stability of Phosphoramidite 9-P in Solution

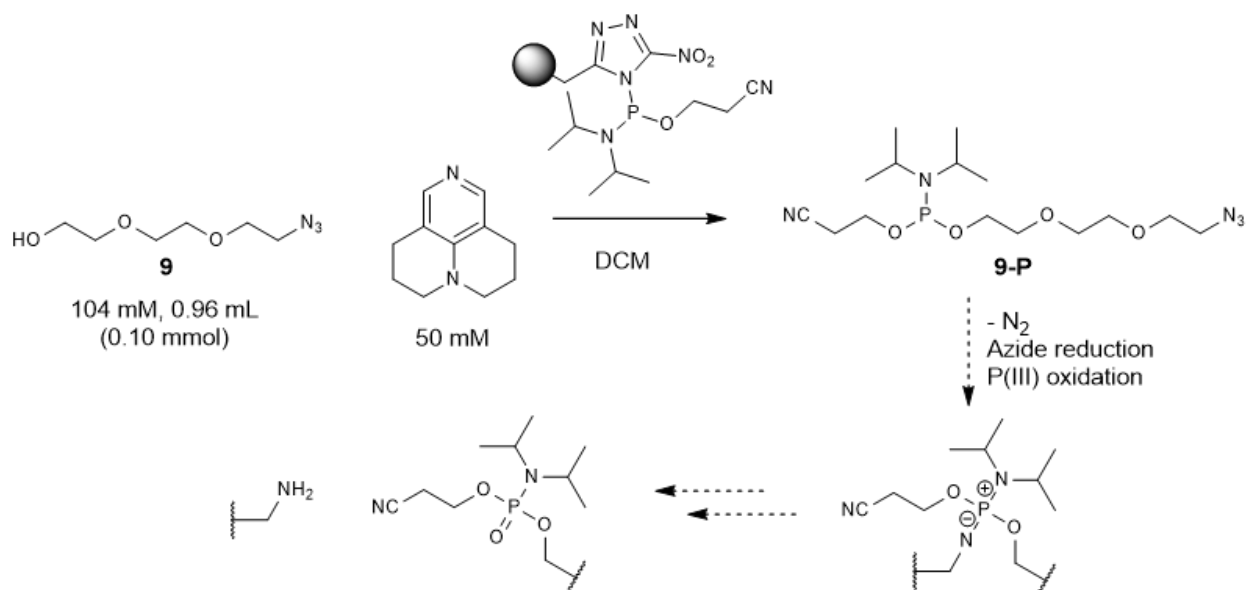

Azide linker **9** (0.1 mmol) with 50 mM 9AJ in CH<sub>2</sub>Cl<sub>2</sub> were eluted through the P(III)-loaded flow system and collected in a flask. The collected eluate was concentrated under reduced pressure and the residue redissolved in CD<sub>3</sub>CN (1.0 mL) to achieve a final concentration of 0.1 M of **9-P**. The stability of **9-P** was monitored by <sup>1</sup>H NMR and <sup>31</sup>P NMR over time. The amount of remaining **9-P** was determined through the ratio of the <sup>31</sup>P NMR signal at 147.9 ppm against the total amount of <sup>31</sup>P NMR signals related to the redox process and not counting the integral of the hydrolysis signal at 13.8 ppm which remained constant throughout this study.

New <sup>31</sup>P NMR signals appearing during storage: 139.9, 32.3, 31.8, 30.4, 17.4, 15.9, 15.8, 15.7, 15.7, 8.6, 5.7, 1.2.

Stacked  $^{31}\text{P}$  NMR spectra ( $\text{CD}_3\text{CN}$ )

Remaining phosphoramidite (147.9 ppm)

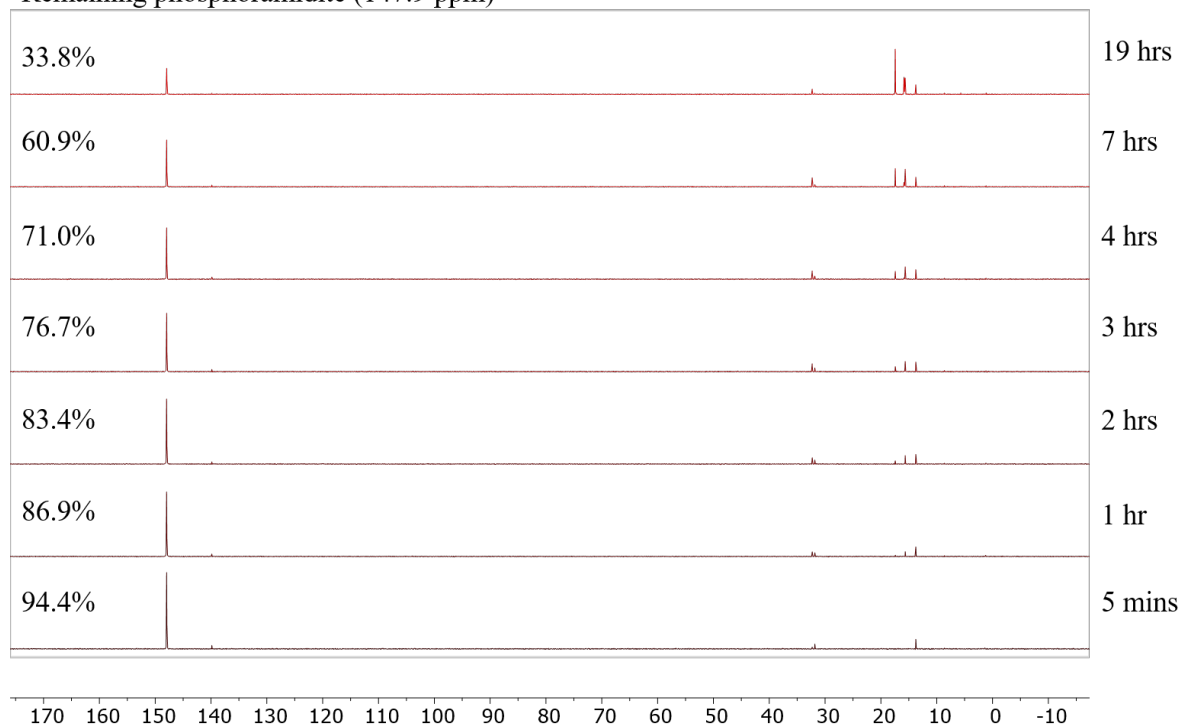

Stacked  $^1\text{H}$  NMR spectra ( $\text{CD}_3\text{CN}$ )

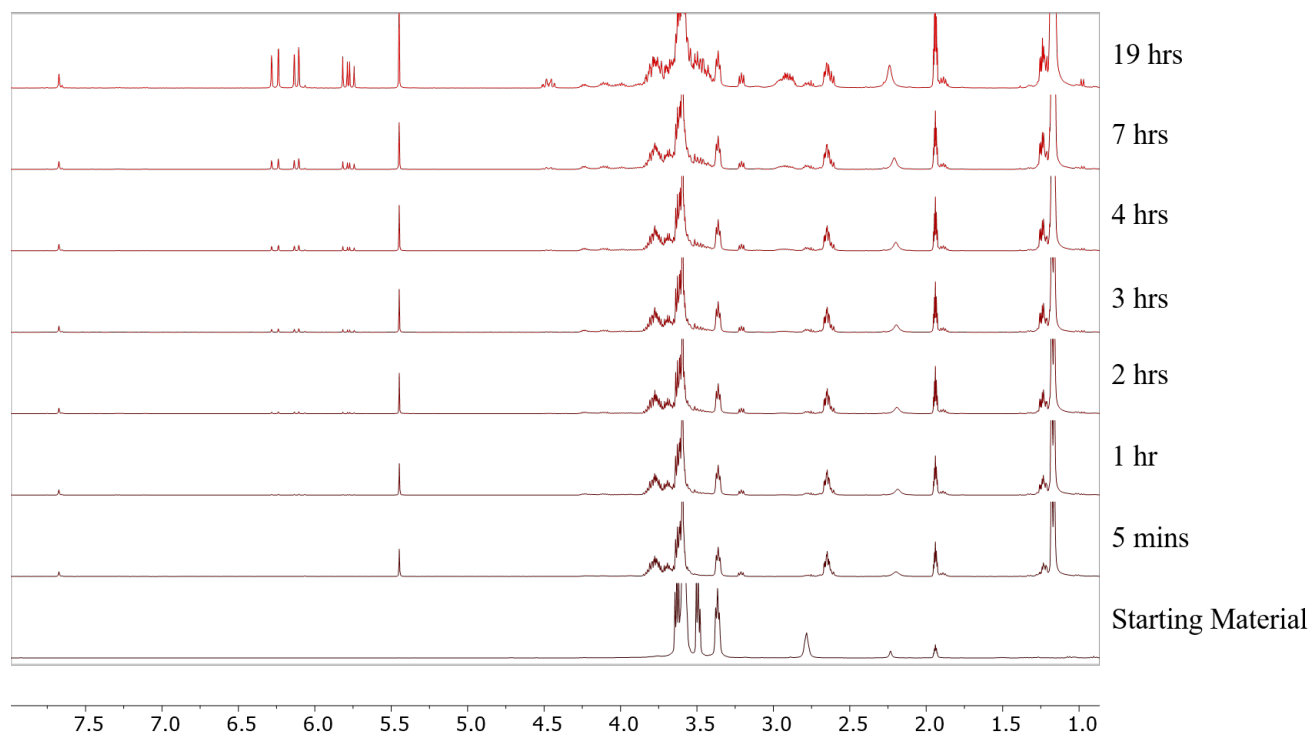

## Synthesis and Characterization of Reference Oligonucleotides

Reference oligonucleotides (T<sub>7</sub>, T<sub>15</sub>, T<sub>7</sub>AT<sub>7</sub>, T<sub>7</sub>CT<sub>7</sub>, T<sub>7</sub>GT<sub>7</sub>, 51-mer) were synthesised using standard oligonucleotide synthesis conditions (Table S7). Yields were determined by measuring UV-analysis of collected fractions.

**Table S7.** Conditions for standard oligonucleotide synthesis.

| Reaction step | Reagents                                                           | Volume      | Coupling time |
|---------------|--------------------------------------------------------------------|-------------|---------------|
| Wash          | MeCN                                                               | 150 $\mu$ L |               |
| Deblock       | 3% TCA in CH <sub>2</sub> Cl <sub>2</sub> (w/v)                    | 150 $\mu$ L | 60 s          |
| Coupling      | 0.1 M phosphoramidite, 0.50 M ETT (1/1, v/v)                       | 140 $\mu$ L | 2 x 60 s      |
| Oxidation     | 0.02 M I <sub>2</sub> , THF/pyridine/H <sub>2</sub> O (7/2/1, v/v) | 150 $\mu$ L | 60 s          |
| Capping       | THF/Ac <sub>2</sub> O/NMI (18/1/1, v/v)                            | 150 $\mu$ L | 60 s          |

HPLC purification and analysis was performed using the following methods:

Method 1:

Solvent A: 0.1 M Triethylammonium acetate, pH = 7

Solvent B: MeCN

Gradient: 5% to 20% B over 15 mins, 20% to 70% B 15-20 mins

Method 2:

Solvent A: 0.1 M Triethylammonium acetate, pH = 7

Solvent B: MeCN

Gradient: 5% to 15% B over 15 mins, 20% to 70% B 15-20 mins

|                   |                 |
|-------------------|-----------------|
| HPLC Method       | 1               |
| Sequence          | 5' TTT TTT T 3' |
| Retention time    | 10.1 mins       |
| Calculated mass   | 2067.4          |
| Found mass (LCMS) | 2066.7          |

HPLC chromatogram (260 nm) of crude 5' TTT TTT T3' after cleavage and concentration.

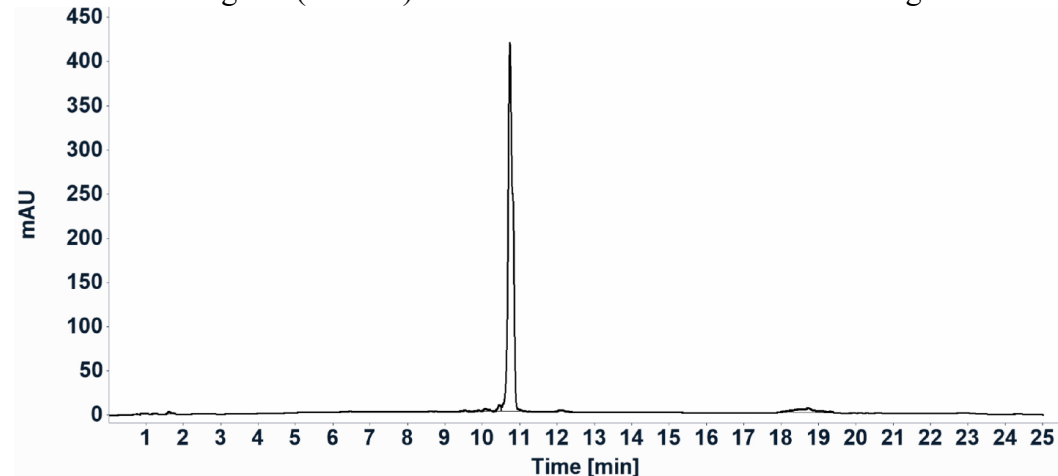



|                   |                           |
|-------------------|---------------------------|
| HPLC Method       | 1                         |
| Sequence          | 5' TTT TTT TTT TTT TTT 3' |
| Retention time    | 12.2 mins                 |
| Calculated mass   | 4501.0                    |
| Found mass (LCMS) | 4501.5                    |

HPLC chromatogram (260 nm) of crude 5' TTT TTT TTT TTT TTT 3' after cleavage and concentration.

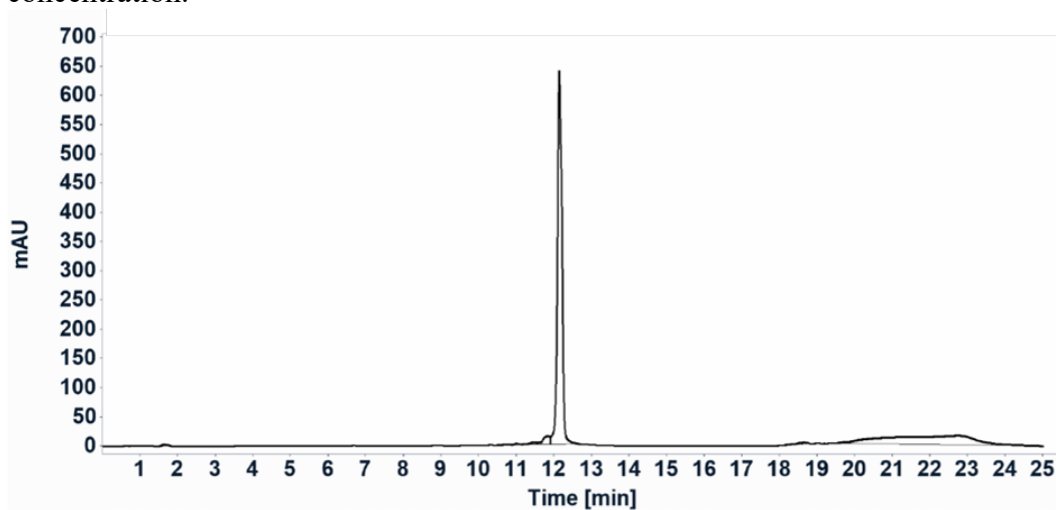

|                   |                           |
|-------------------|---------------------------|
| HPLC Method       | 1                         |
| Sequence          | 5' TTT TTT TAT TTT TTT 3' |
| Retention time    | 12.1 mins                 |
| Calculated mass   | 4510.0                    |
| Found mass (LCMS) | 4510.5                    |

HPLC chromatogram (260 nm) of crude 5' TTT TTT TAT TTT TTT 3' after cleavage and concentration.

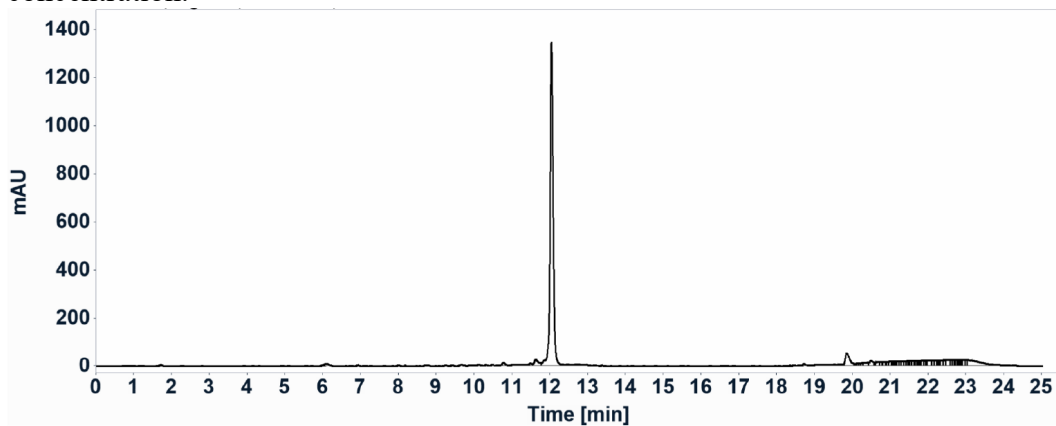

|                   |                           |
|-------------------|---------------------------|
| HPLC Method       | 1                         |
| Sequence          | 5' TTT TTT TCT TTT TTT 3' |
| Retention time    | 12.0 mins                 |
| Calculated mass   | 4485.9                    |
| Found mass (LCMS) | 4486.5                    |

HPLC chromatogram (260 nm) of crude 5' TTT TTT TCT TTT TTT 3' after cleavage and concentration.

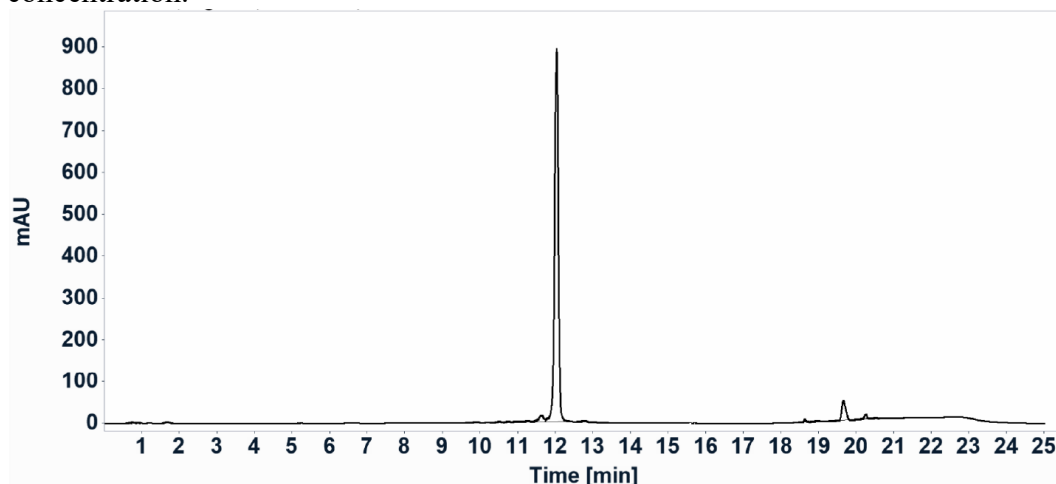

|                   |                           |
|-------------------|---------------------------|
| HPLC Method       | 1                         |
| Sequence          | 5' TTT TTT TGT TTT TTT 3' |
| Retention time    | 11.9 mins                 |
| Calculated mass   | 4526.0                    |
| Found mass (LCMS) | 4526.7                    |

HPLC chromatogram (260 nm) of crude 5' TTT TTT TGT TTT TTT 3' after cleavage and concentration.

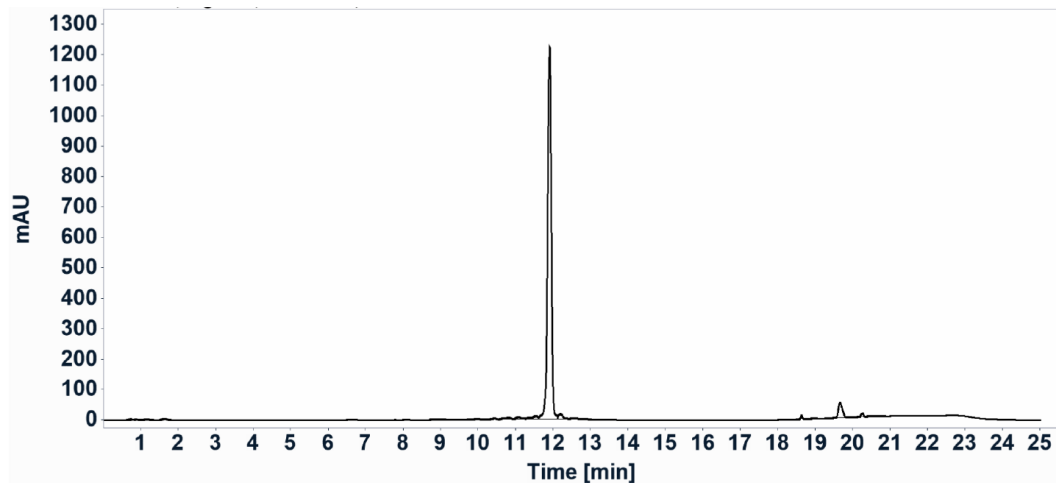

|                     |                                                                             |
|---------------------|-----------------------------------------------------------------------------|
| HPLC Method         | 2                                                                           |
| Sequence            | 5'CCG CTT TCT AGT TCG TCC TCC ATA ATT AAT TTC CTA<br>GAG TCC TAC GTG CTC 3' |
| Retention time      | 15.9 mins                                                                   |
| Calculated mass     | 15467.9                                                                     |
| Found mass (LCMS)   | 15467.6                                                                     |
| Coupling time       | 2 x 60 s                                                                    |
| Yield               | 41.8%                                                                       |
| Average Cycle Yield | 98.3%                                                                       |

HPLC chromatogram (260 nm) of 51-mer after cleavage and concentration.

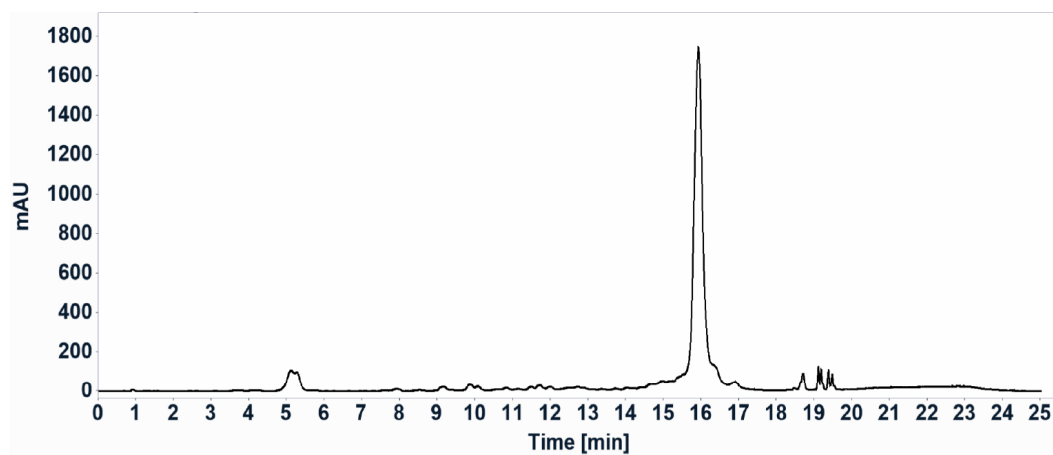

## Single Coupling Reactions

The synthetic cycle described in Table S5 with optimal residence time for the given alcohols according to Table S6 was used for the synthesis of the phosphoramidites. The eluate was collected for 6 void volumes and concentrated under reduced pressure. The residue was redissolved in MeCN (1.0 mL) to reach a final concentration of 0.1 M. Standard coupling conditions (Table S7) were used for phosphoramidites synthesised by conventional methods.

Common Sequence (T<sub>7</sub>BT<sub>7</sub>): 5' TTT TTT TBT TTT TTT 3'

For compound **8-P** and **9-P**, oligonucleotide synthesis was stopped after coupling with **8-P** or **9-P** and oxidation. The coupling yield was based on integration ratio of absorbance at 260 nm between the truncated oligonucleotide (T<sub>7</sub>): 5' TTT TTT T 3' and the desired full-length oligonucleotide (T<sub>7</sub>XT<sub>7</sub>) on HPLC chromatogram by the formula:

$$Yield = \frac{A_{T_7XT_7}}{A_{Total}} = \frac{A_{T_7XT_7}}{A_{T_7XT_7} + \frac{\varepsilon(T_7XT_7)_{260}}{\varepsilon(T_7)_{260}} \cdot A_{T_7}}$$

Where  $\varepsilon$  is the molar extinction coefficient for the given oligonucleotide.  $\varepsilon$  was calculated using <http://www.molbiotools.com/dnacalculator.html>.

For the nucleotides **1**, **3**, **5** and **6**, thymidine was used in the calculation of  $\varepsilon$  and for **4**, adenosine was used instead. For the calculation of oligonucleotides containing **2** and **7**,  $\varepsilon$  was calculated as 2 times  $\varepsilon_{T_7}$ .

The oligonucleotides were cleaved directly from the resin by treatment with AMA for 30 mins at 65 °C if G was present in the sequence and otherwise cleaved by treatment with concentrated aqueous NH<sub>3</sub> for 30 mins at 50 °C. The supernatant was concentrated under reduced pressure and the residue subjected to HPLC purification.

**Table S8.** Summary of results from single coupling study

| Entry    | Coupling time | Coupling yield |
|----------|---------------|----------------|
| T        | 2 x 60 s      | 99.7%          |
| Bz-dA    | 2 x 60 s      | 99.3%          |
| Bz-dC    | 2 x 60 s      | 99.8%          |
| iBu-dG   | 2 x 60 s      | 99.3%          |
| <b>1</b> | 2 x 60 s      | 99.7%          |
| <b>2</b> | 2 x 60 s      | 98.3%          |
| <b>3</b> | 2 x 60 s      | 99.2%          |
| <b>3</b> | 2 x 240 s     | 99.7%          |
| <b>4</b> | 2 x 60 s      | 94.8%          |
| <b>4</b> | 2 x 240 s     | 99.6%          |
| <b>5</b> | 2 x 60 s      | 70.9%          |
| <b>5</b> | 2 x 240s      | 98.1%          |
| <b>6</b> | 2 x 60 s      | 99.2%          |
| <b>7</b> | 2 x 60 s      | 98.0%          |
| <b>8</b> | 2 x 60 s      | 99.0%          |
| <b>9</b> | 2 x 60 s      | 99.4%          |

|                                    |                           |
|------------------------------------|---------------------------|
| HPLC Method                        | 1                         |
| Sequence                           | 5' TTT TTT TTT TTT TTT 3' |
| Retention time                     | 12.0 mins                 |
| Calculated mass                    | 4501.0                    |
| Found mass (LCMS)                  | 4501.4                    |
| $\epsilon(T_7)_{260}$              | 57300                     |
| $\epsilon(T_7XT_7)_{260}$          | 122100                    |
| Coupling time                      | 2 x 60 s                  |
| A(T <sub>7</sub> )                 | 20                        |
| A(T <sub>7</sub> XT <sub>7</sub> ) | 13360                     |
| Coupling Yield                     | 99.7%                     |

HPLC chromatogram (260 nm) of crude 5' TTT TTT TTT TTT TTT 3' after cleavage and concentration.

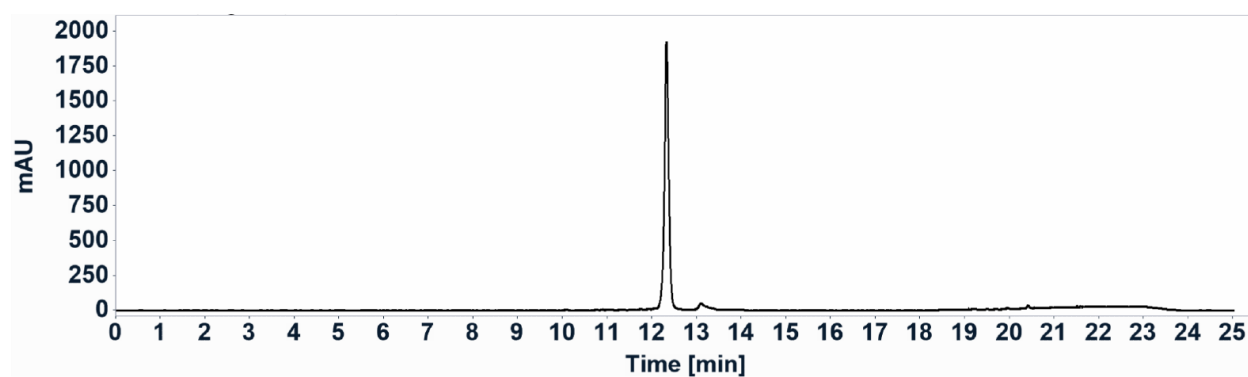

|                                    |                           |
|------------------------------------|---------------------------|
| HPLC Method                        | 1                         |
| Sequence                           | 5' TTT TTT TAT TTT TTT 3' |
| Retention time                     | 12.2 mins                 |
| Calculated mass                    | 4510.0                    |
| Found mass (LCMS)                  | 4510.3                    |
| $\epsilon(T_7)_{260}$              | 57300                     |
| $\epsilon(T_7XT_7)_{260}$          | 128000                    |
| Coupling time                      | 2 x 60 s                  |
| A(T <sub>7</sub> )                 | 35                        |
| A(T <sub>7</sub> XT <sub>7</sub> ) | 11047                     |
| Coupling Yield                     | 99.3%                     |

HPLC chromatogram (260 nm) of crude 5' TTT TTT TAT TTT TTT 3' after cleavage and concentration.

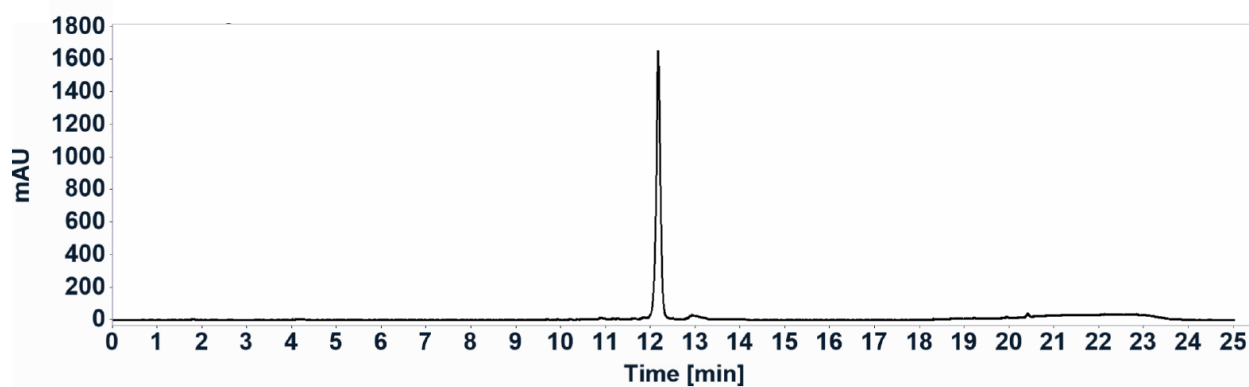

|                           |                           |
|---------------------------|---------------------------|
| HPLC Method               | 1                         |
| Sequence                  | 5' TTT TTT TCT TTT TTT 3' |
| Retention time            | 11.9 mins                 |
| Calculated mass           | 4485.9                    |
| Found mass (LCMS)         | 4486.3                    |
| $\epsilon(T_7)_{260}$     | 57300                     |
| $\epsilon(T_7XT_7)_{260}$ | 121200                    |
| Coupling time             | 2 x 60 s                  |
| $A(T_7)$                  | 10                        |
| $A(T_7XT_7)$              | 11254                     |
| Coupling Yield            | 99.8%                     |

HPLC chromatogram (260 nm) of crude 5' TTT TTT TCT TTT TTT 3' after cleavage and concentration.

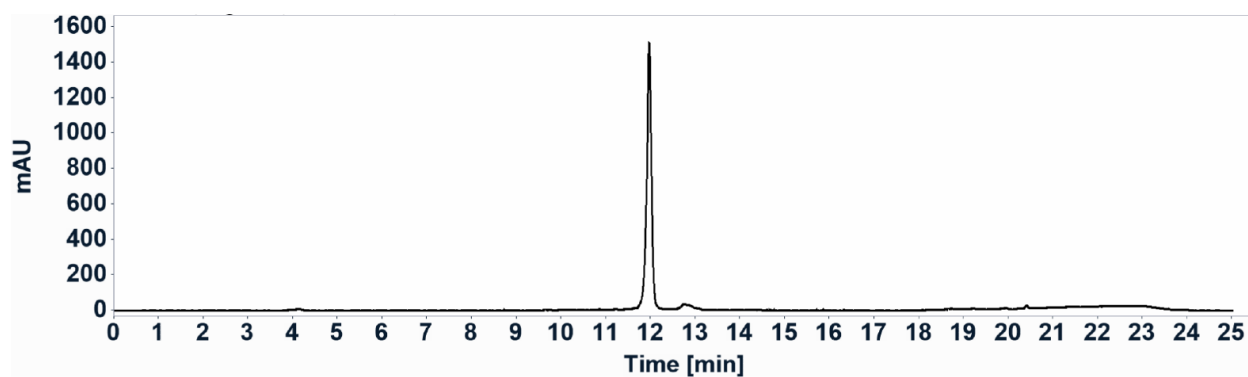



|                                    |                           |
|------------------------------------|---------------------------|
| HPLC Method                        | 1                         |
| Sequence                           | 5' TTT TTT TGT TTT TTT 3' |
| Retention time                     | 12.0 mins                 |
| Calculated mass                    | 4526.0                    |
| Found mass (LCMS)                  | 4526.4                    |
| $\epsilon(T_7)_{260}$              | 57300                     |
| $\epsilon(T_7XT_7)_{260}$          | 124700                    |
| Coupling time                      | 2 x 60 s                  |
| A(T <sub>7</sub> )                 | 37                        |
| A(T <sub>7</sub> XT <sub>7</sub> ) | 11535                     |
| Coupling Yield                     | 99.3%                     |

HPLC chromatogram (260 nm) of crude 5' TTT TTT TGT TTT TTT 3' after cleavage and concentration.

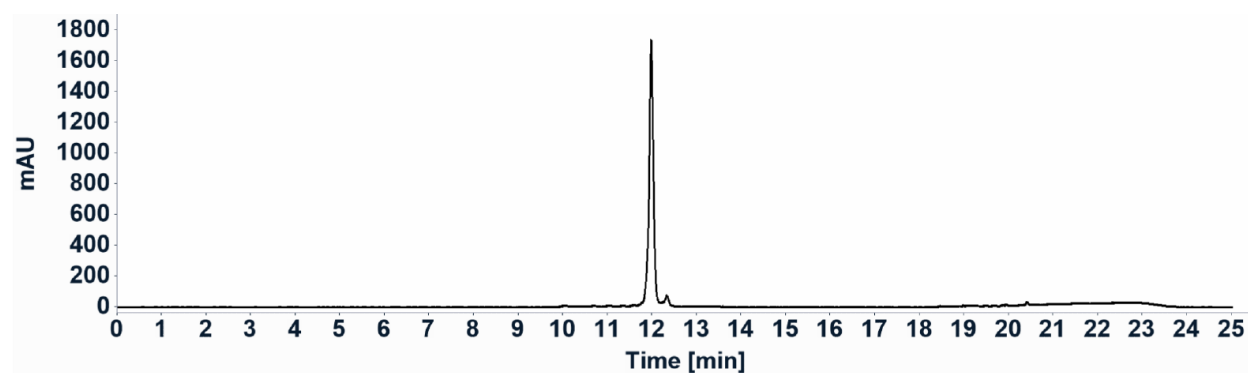

|                                    |                           |
|------------------------------------|---------------------------|
| HPLC Method                        | 1                         |
| Sequence                           | 5' TTT TTT T1T TTT TTT 3' |
| Retention time                     | 12.2 mins                 |
| Calculated mass                    | 4504.9                    |
| Found mass (LCMS)                  | 4504.1                    |
| $\epsilon(T_7)_{260}$              | 57300                     |
| $\epsilon(T_7XT_7)_{260}$          | 122100                    |
| Coupling time                      | 2 x 60 s                  |
| A(T <sub>7</sub> )                 | 20                        |
| A(T <sub>7</sub> XT <sub>7</sub> ) | 13951                     |
| Coupling Yield                     | 99.7%                     |

HPLC chromatogram (260 nm) of crude 5' TTT TTT T1T TTT TTT 3' after cleavage and concentration.

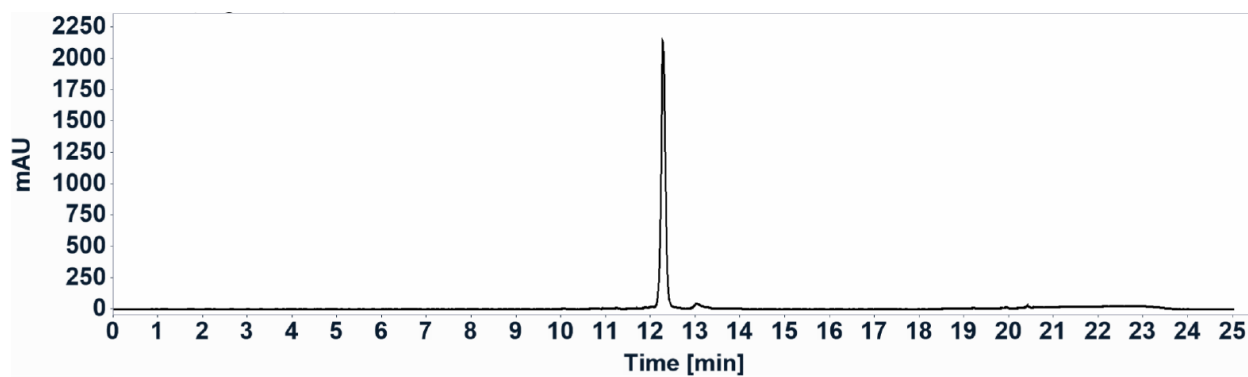

|                           |                           |
|---------------------------|---------------------------|
| HPLC Method               | 1                         |
| Sequence                  | 5' TTT TTT T2T TTT TTT 3' |
| Retention time            | 12.1 mins                 |
| Calculated mass           | 4376.9                    |
| Found mass (LCMS)         | 4376.4                    |
| $\epsilon(T_7)_{260}$     | 57300                     |
| $\epsilon(T_7XT_7)_{260}$ | 114600                    |
| Coupling time             | 2 x 60 s                  |
| $A(T_7)$                  | 75                        |
| $A(T_7XT_7)$              | 9389                      |
| Coupling Yield            | 98.4%                     |

HPLC chromatogram (260 nm) of crude 5' TTT TTT T2T TTT TTT 3' after cleavage and concentration.

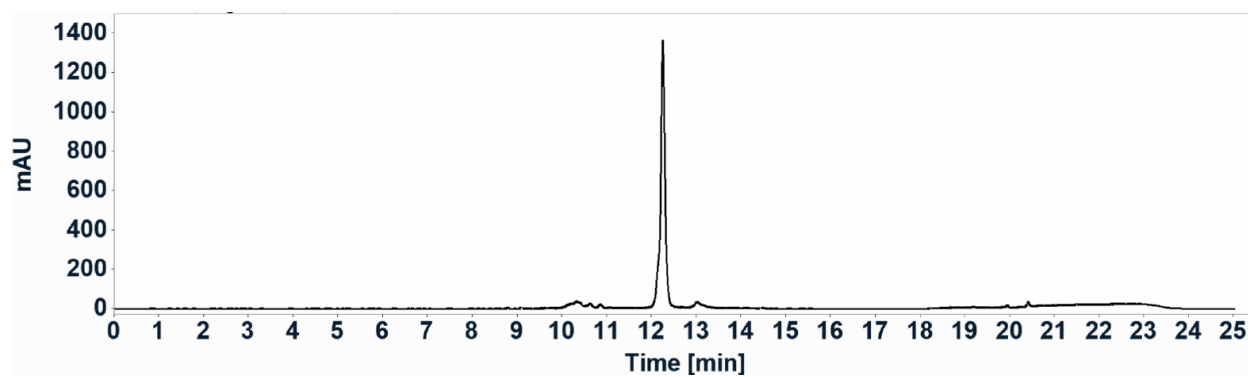

|                                    |                           |           |
|------------------------------------|---------------------------|-----------|
| HPLC Method                        | 1                         |           |
| Sequence                           | 5' TTT TTT T3T TTT TTT 3' |           |
| Retention time                     | 12.5 mins                 |           |
| Calculated mass                    | 4517.0                    |           |
| Found mass (LCMS)                  | 4516.4                    |           |
| $\epsilon(T_7)_{260}$              | 57300                     |           |
| $\epsilon(T_7XT_7)_{260}$          | 122100                    |           |
| Coupling time                      | 2 x 60 s                  | 2 x 240 s |
| A(T <sub>7</sub> )                 | 52                        | 15        |
| A(T <sub>7</sub> XT <sub>7</sub> ) | 13888                     | 12376     |
| Coupling Yield                     | 99.2%                     | 99.7%     |

HPLC chromatograms (260 nm) of crude 5' TTT TTT T3T TTT TTT 3' after cleavage and concentration.

Coupling time = 2 x 60 s

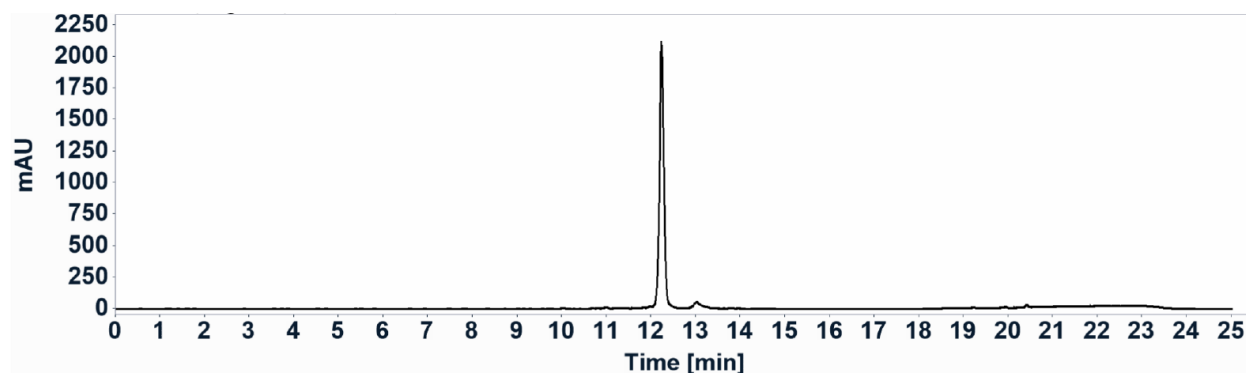

Coupling time = 2 x 240 s

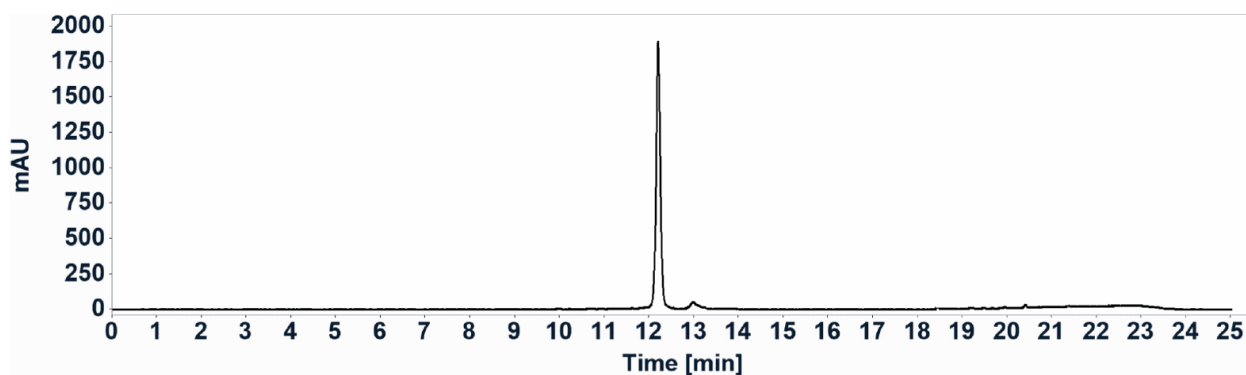

|                                    |                           |           |
|------------------------------------|---------------------------|-----------|
| HPLC Method                        | 1                         |           |
| Sequence                           | 5' TTT TTT T4T TTT TTT 3' |           |
| Retention time                     | 12.9 mins                 |           |
| Calculated mass                    | 4562.4                    |           |
| Found mass (LCMS)                  | 4561.8                    |           |
| $\epsilon(T_7)_{260}$              | 57300                     |           |
| $\epsilon(T_7XT_7)_{260}$          | 128000                    |           |
| Coupling time                      | 2 x 60 s                  | 2 x 240 s |
| A(T <sub>7</sub> )                 | 267                       | 20        |
| A(T <sub>7</sub> XT <sub>7</sub> ) | 10799                     | 11421     |
| Coupling Yield                     | 94.8%                     | 99.6%     |

HPLC chromatograms (260 nm) of crude 5' TTT TTT T4T TTT TTT 3' after cleavage and concentration.

Coupling time = 2 x 60 s

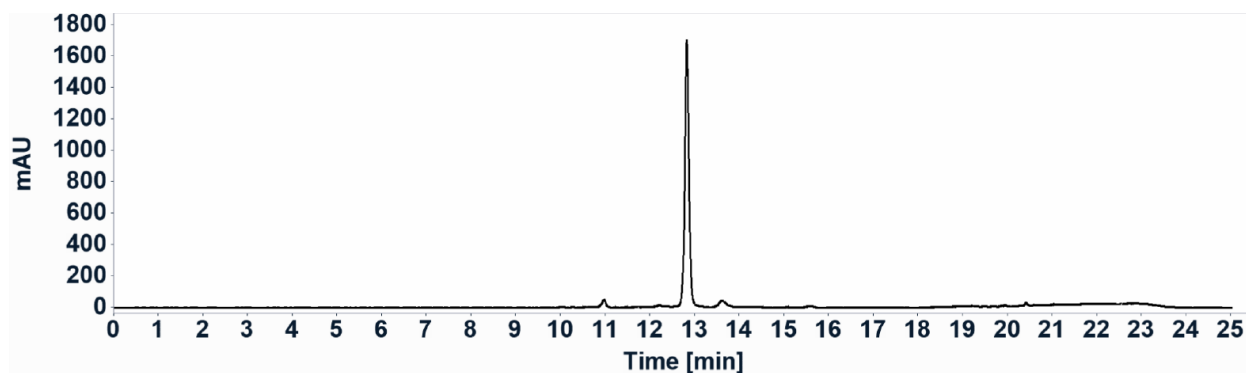

Coupling time = 2 x 240 s

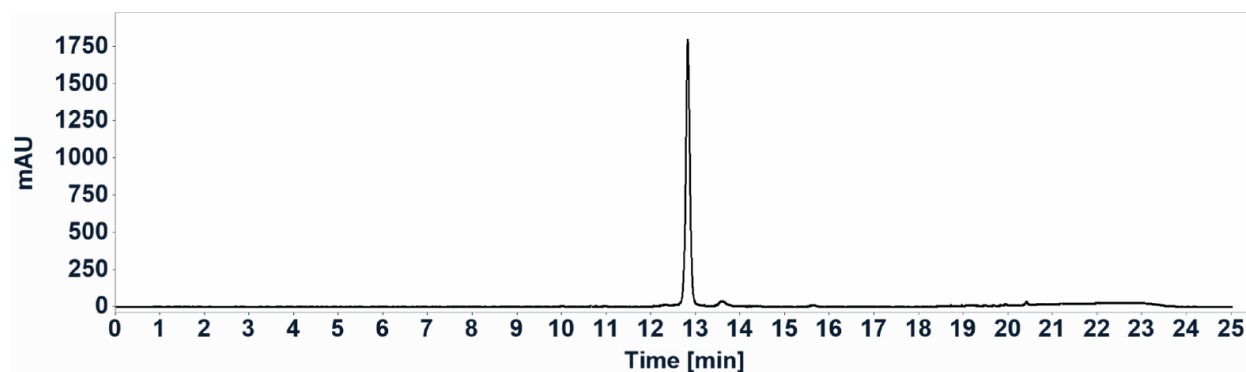

|                                     |                           |           |
|-------------------------------------|---------------------------|-----------|
| HPLC Method                         | 1                         |           |
| Sequence                            | 5' TTT TTT T5T TTT TTT 3' |           |
| Retention time                      | 12.8 mins                 |           |
| Calculated mass                     | 4518.9                    |           |
| Found mass (LCMS)                   | 4518.3                    |           |
| $\epsilon(T_7)_{260}$               | 57300                     |           |
| $\epsilon(T_7XT_7)_{260}$           | 122100                    |           |
| Coupling time                       | 2 x 60 s                  | 2 x 240 s |
| A(T <sub>7</sub> )                  | 1586                      | 86        |
| A(T <sub>7</sub> X T <sub>7</sub> ) | 8236                      | 9345      |
| Coupling Yield                      | 70.9%                     | 98.1%     |

HPLC chromatograms (260 nm) of crude 5' TTT TTT T5T TTT TTT 3' after cleavage and concentration.

Coupling time = 2 x 60 s

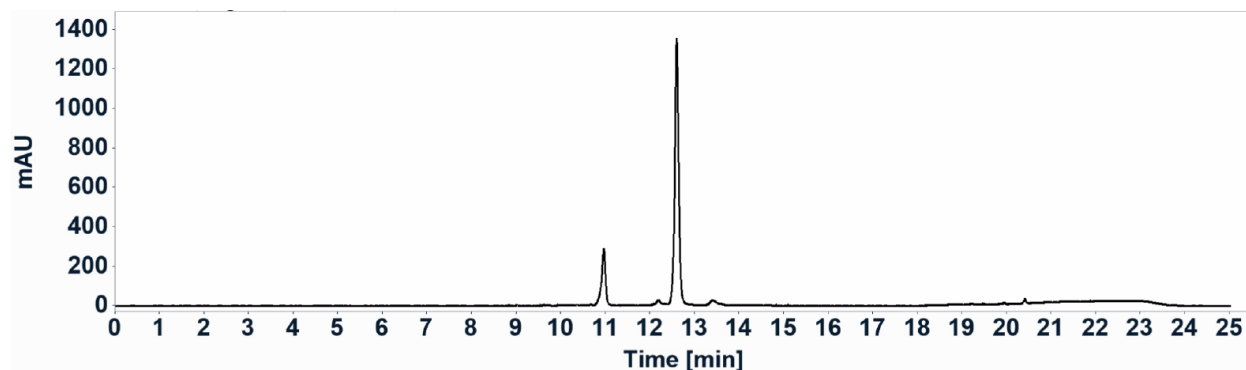

Coupling time = 2 x 240 s

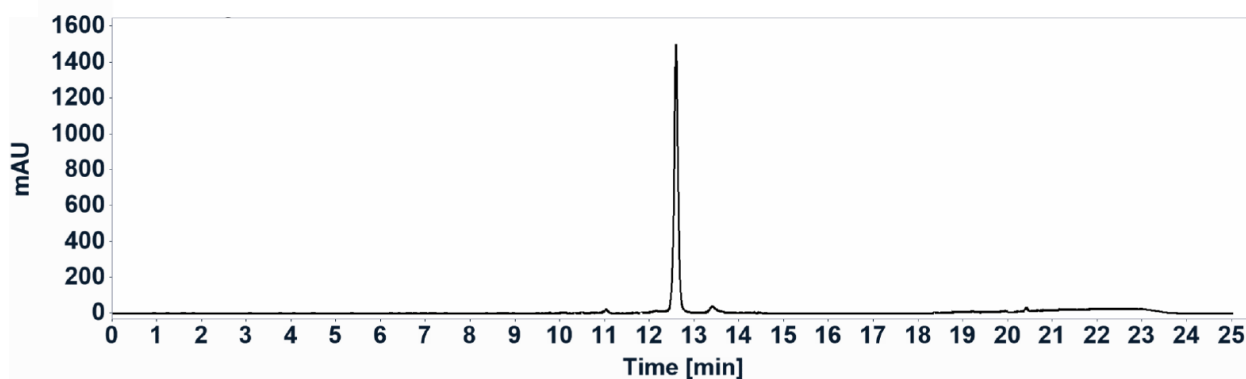

|                                    |                           |
|------------------------------------|---------------------------|
| HPLC Method                        | 1                         |
| Sequence                           | 5' TTT TTT T6T TTT TTT 3' |
| Retention time                     | 11.9 mins                 |
| Calculated mass                    | 4516.0                    |
| Found mass (LCMS)                  | 4515.3                    |
| $\epsilon(T_7)_{260}$              | 57300                     |
| $\epsilon(T_7XT_7)_{260}$          | 122100                    |
| Coupling time                      | 2 x 60 s                  |
| A(T <sub>7</sub> )                 | 49                        |
| A(T <sub>7</sub> XT <sub>7</sub> ) | 12431                     |
| Coupling Yield                     | 99.2%                     |

HPLC chromatogram (260 nm) of crude 5' TTT TTT T6T TTT TTT 3' after cleavage and concentration.

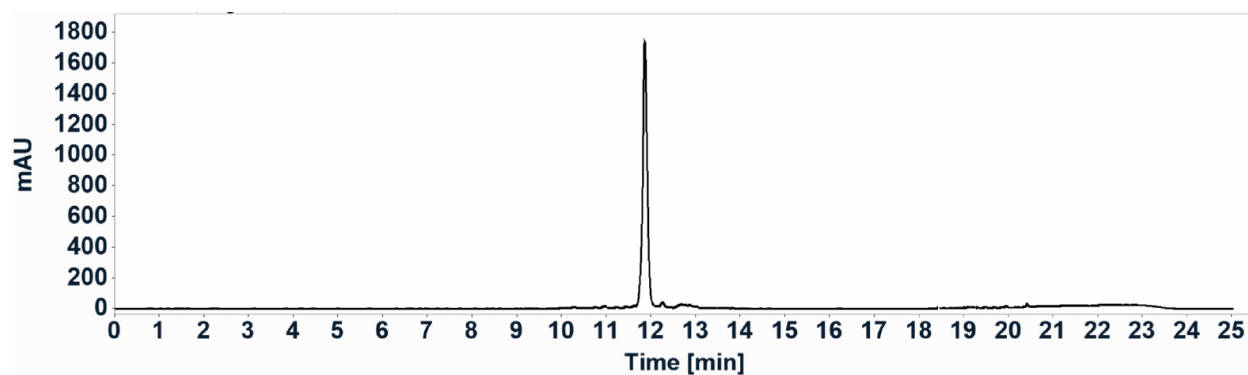

|                                    |                           |
|------------------------------------|---------------------------|
| HPLC Method                        | 1                         |
| Sequence                           | 5' TTT TTT T7T TTT TTT 3' |
| Retention time                     | 12.2 mins                 |
| Calculated mass                    | 4408.9                    |
| Found mass (LCMS)                  | 4408.5                    |
| $\epsilon(T_7)_{260}$              | 57300                     |
| $\epsilon(T_7XT_7)_{260}$          | 114600                    |
| Coupling time                      | 2 x 60 s                  |
| A(T <sub>7</sub> )                 | 101                       |
| A(T <sub>7</sub> XT <sub>7</sub> ) | 9925                      |
| Coupling Yield                     | 98.0%                     |

HPLC chromatogram (260 nm) of crude 5' TTT TTT T7T TTT TTT 3' after cleavage and concentration.

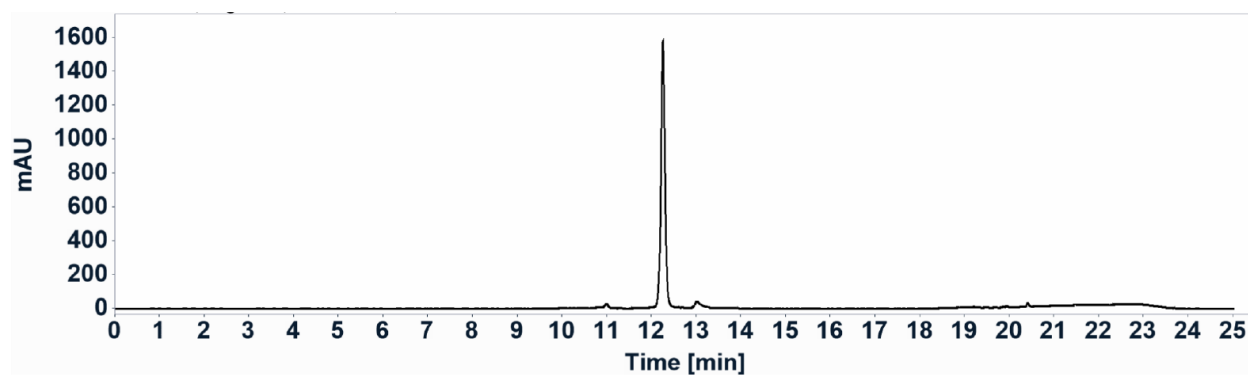



|                                     |                          |
|-------------------------------------|--------------------------|
| HPLC Method                         | 1                        |
| Sequence                            | 5' <b>8</b> TT TTT TT 3' |
| Retention time                      | 18.7 mins                |
| Calculated mass                     | 2395.46                  |
| Found mass (LCMS)                   | 2395.41                  |
| $\epsilon(T_7)_{260}$               | 57300                    |
| $\epsilon(T_7XT_7)_{260}$           | 57300                    |
| Coupling time                       | 2 x 60 s                 |
| A(T <sub>7</sub> )                  | 66                       |
| A(T <sub>7</sub> X T <sub>7</sub> ) | 6426                     |
| Coupling Yield                      | 99.0%                    |

HPLC chromatogram (260 nm) of crude 5' **8**TT TTT TT 3' after cleavage and concentration.

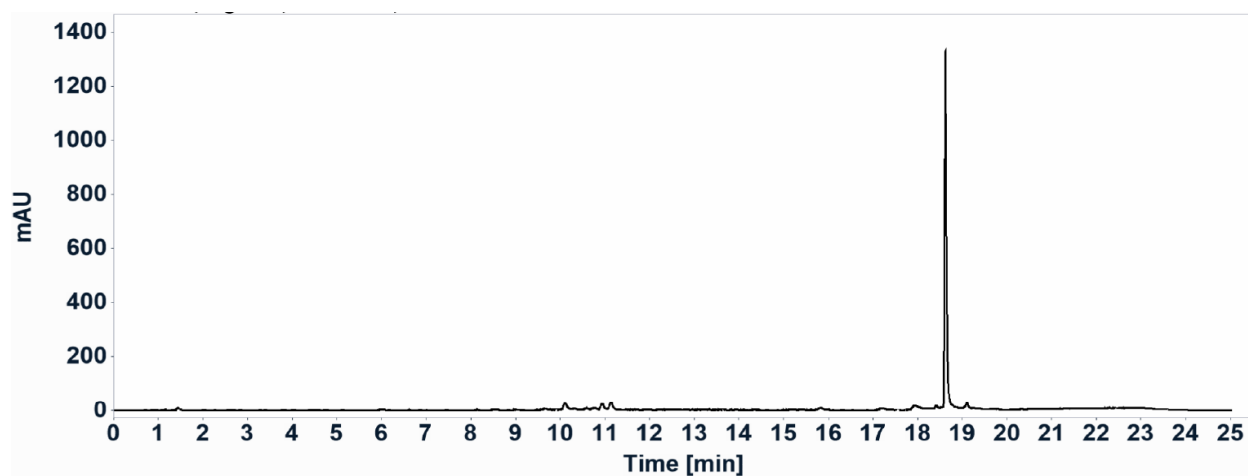

|                                    |                  |
|------------------------------------|------------------|
| HPLC Method                        | 1                |
| Sequence                           | 5' 9TT TTT TT 3' |
| Retention time                     | 12.8 mins        |
| Calculated mass                    | 2304.6           |
| Found mass (MALDI)                 | 2309.8           |
| $\epsilon(T_7)_{260}$              | 57300            |
| $\epsilon(T_7XT_7)_{260}$          | 57300            |
| Coupling time                      | 2 x 60 s         |
| A(T <sub>7</sub> )                 | 27               |
| A(T <sub>7</sub> XT <sub>7</sub> ) | 4795             |
| Coupling Yield                     | 99.4%            |

HPLC chromatogram (260 nm) of crude 5' 9TT TTT TT 3' after cleavage and concentration.

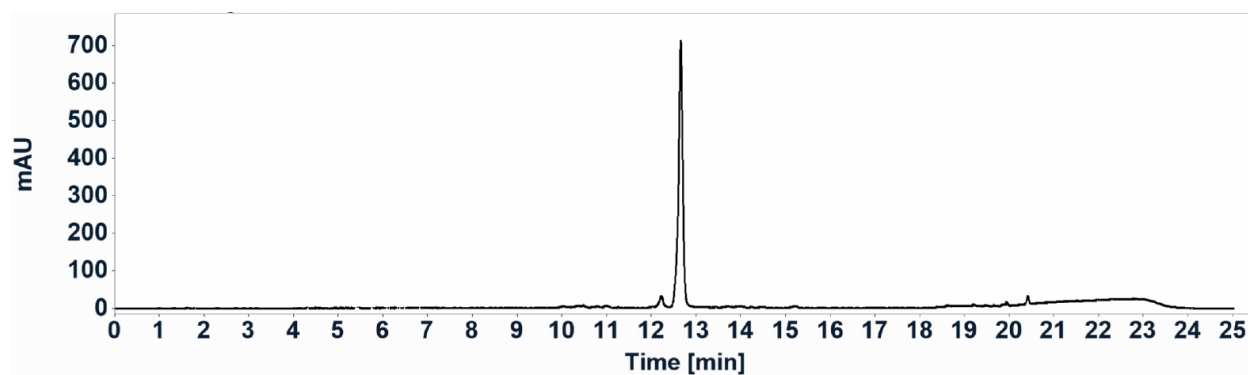

## Oligonucleotide Synthesis

The synthetic cycle described in Table S5 with optimal residence times for the given alcohols according to Table S6 was used for the synthesis of the phosphoramidites. The eluate was collected for 6 void volumes and concentrated under reduced pressure. The residue was redissolved in MeCN (1.0 mL) to reach a final concentration of 0.1 M. Standard coupling conditions (Table S7) were used for phosphoramidites synthesised by conventional methods.

All phosphoramidites was synthesised by the flow-based method described herein and used for the synthesis of the following sequence:

**51-mer Sequence:** 5'CCG CTT TCT AGT TCG TCC TCC ATA ATT AAT TTC CTA GAG TCC TAC GTG CTC 3'

It should be noted that 3'C is bound to the resin as the first nucleotide giving a total of 50 cycles. The oligonucleotides were cleaved directly from the resin by treatment with AMA for 30 mins at 65 °C. The supernatant was concentrated under reduced pressure and the residue subjected to HPLC purification.

|                     |                                                                          |
|---------------------|--------------------------------------------------------------------------|
| Sequence            | 5'CCG CTT TCT AGT TCG TCC TCC ATA ATT AAT TTC CTA GAG TCC TAC GTG CTC 3' |
| Coupling time       | 2 x 60 s                                                                 |
| Retention time      | 16.2 mins                                                                |
| Calculated mass     | 15467.9                                                                  |
| Found mass (LCMS)   | 15467.6                                                                  |
| Yield               | 35.2%                                                                    |
| Average Cycle Yield | 98.0%                                                                    |

HPLC chromatogram (260 nm) of crude 51mer after cleavage and concentration.

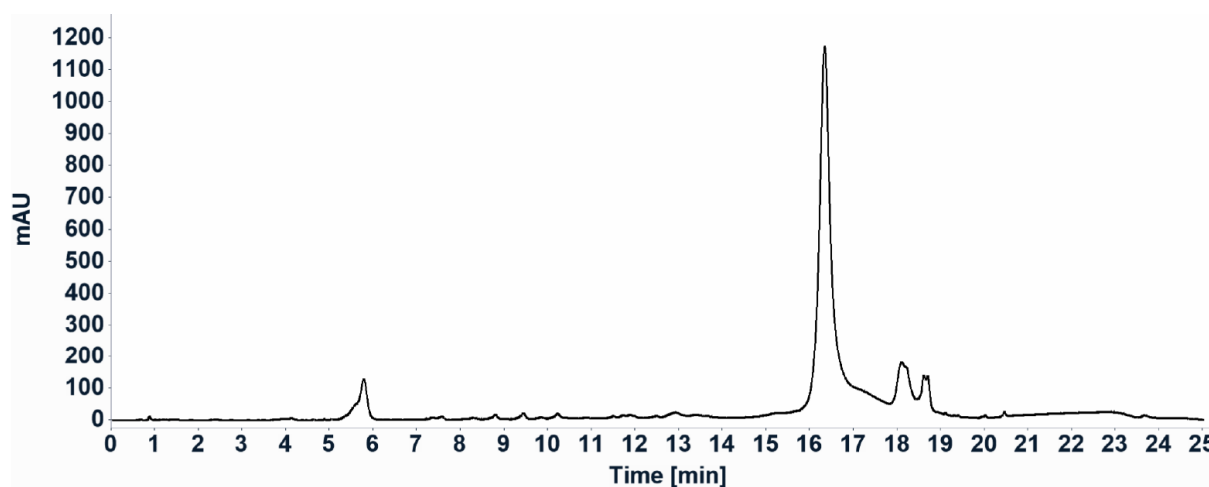

## Synthesis of Reference Phosphoramidites

Non-commercial phosphoramidites were synthesised using the following protocol:

Alcohol (1.0 eq, 20 mM) was dissolved in CH<sub>2</sub>Cl<sub>2</sub> and DIPEA (2.0 eq) was added along with PCl (1.5 eq) and the mixture was stirred for until full conversion (1-16 hrs) at rt The solvent was then removed under reduced pressure and the residue was subjected to flash column chromatography to give the desired compound.

### Compound 1-P

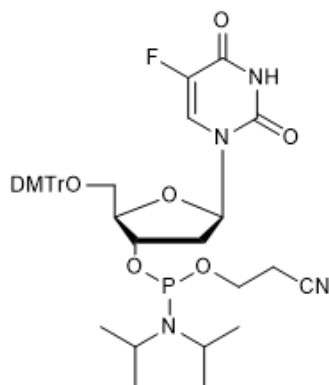

Yield: 106 mg, 0.144 mmol (79 %) from 100 mg, 0.182 mmol

**<sup>1</sup>H NMR (400 MHz, CD<sub>3</sub>CN)** 7.77 (dd, *J* = 12.76, 6.74 Hz, 1H), 7.47-7.42 (m, 2H), 7.36-7.28 (m, 6H), 7.27-7.21 (m, 1H), 6.91-6.84 (m, 4H), 6.17 (q, *J* = 8.70 Hz, 1H), 4.66-4.55 (m, 1H), 4.09 (dq, *J* = 15.69, 3.69 Hz, 1H), 3.77 (d, *J* = 1.92 Hz, 1H), 3.72-3.50 (m, 3H), 3.37-3.29 (m, 2H), 2.64 (t, *J* = 5.93 Hz, 1H), 2.53 (t, *J* = 5.92 Hz, 1H), 2.49-2.28 (m, 2H), 1.34-1.03 (m, 12H)

**<sup>13</sup>C NMR (100 MHz, CD<sub>3</sub>CN)** δ<sub>C</sub> (ppm) 159.8, 158.0, 157.8, 149.7, 145.9, 142.7, 140.4, 136.6, 136.6, 136.5, 136.5, 131.1, 129.0, 128.9, 128.0, 125.4, 125.1, 119.4, 114.2, 114.1, 87.6, 86.2, 86.1, 86.0, 73.5, 73.3, 63.8, 59.6, 59.4, 55.9, 55.9, 44.1, 44.1, 44.0, 44.0, 40.2, 40.1, 24.9, 24.9, 24.9, 24.8, 21.0, 21.0

**<sup>31</sup>P NMR (162 MHz, CD<sub>3</sub>CN)** δ<sub>P</sub> (ppm) 148.15, 148.08.

**<sup>19</sup>F NMR (376 MHz, CD<sub>3</sub>CN)** δ<sub>F</sub> (ppm) -167.16, -167.19

**HRMS (ESI)** *m/z* [M+Na]<sup>+</sup> calc. for C<sub>39</sub>H<sub>47</sub>FN<sub>4</sub>O<sub>8</sub>PNa 749.3110, found 749.3116

## Compound 4-P

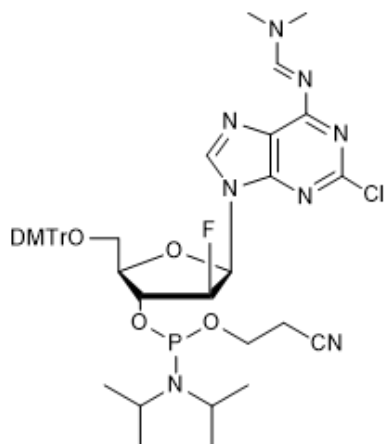

Yield: 88 mg, 0.102 mmol (90% yield) from 75 mg, 0.114 mmol

**<sup>1</sup>H NMR (400 MHz, CD<sub>3</sub>CN)** δ<sub>H</sub> (ppm) 8.86 (s, 1H), 8.07 (dd, *J* = 6.85, 4.75 Hz, 1H), 7.45 (t, *J* = 6.51 Hz, 1H), 7.35-7.19 (m, 7H), 6.86-6.77 (m, 4H), 6.38 (2xdd, *J* = 4.45, 2.15 Hz 4.49, 1.58 Hz, 1H), 5.34 (2xdt, *J* = 19.57, 3.45 Hz 19.9, 3.86 Hz, 1H), 4.89-4.86 (m, 1H), 4.24-4.17 (m, 1H), 3.86-3.78 (m, 1H), 3.76-3.72 (m, 6H), 3.69-3.34 (m, 5 or 6H), 3.18 (s, 3H), 3.16 (s, 3H), 2.57 (2xt, *J* = 6.00 Hz 6.03 Hz, 2H), 1.20-1.02 (m, 12H).

**<sup>13</sup>C NMR (100 MHz, CD<sub>3</sub>CN)** δ<sub>C</sub> (ppm) 161.7, 159.7, 159.7, 154.3, 154.3, 153.6, 153.6, 146.0, 146.0, 142.6, 142.5, 142.4, 142.4, 136.7, 136.7, 136.7, 136.6, 131.1, 131.0, 131.0, 130.9, 129.0, 128.9, 128.8, 128.8, 127.9, 127.8, 125.6, 125.5, 119.4, 119.3, 114.0, 114.0, 96.9, 96.8, 94.9, 94.9, 87.2, 87.1, 83.4, 83.3, 83.2, 83.0, 82.8, 82.8, 77.5, 77.4, 77.3, 77.1, 76.7, 76.6, 76.5, 76.3, 64.1, 63.8, 59.9, 59.8, 59.8, 59.6, 55.9, 55.9, 44.2, 44.2, 44.1, 44.1, 41.8, 35.5, 24.9, 24.9, 24.8, 24.8, 21.0, 20.9, 20.9.

**<sup>31</sup>P NMR (162 MHz, CD<sub>3</sub>CN)** δ<sub>P</sub> (ppm) 150.26, 150.22, 150.18.

**<sup>19</sup>F NMR (376 MHz, CD<sub>3</sub>CN)** δ<sub>F</sub> (ppm) -197.52, -197.54, -197.63, -197.64.

**HRMS (ESI)** *m/z* [M+Na]<sup>+</sup> calc. for C<sub>43</sub>H<sub>51</sub>ClFN<sub>8</sub>O<sub>6</sub>PNa 883.3234, found 883.3237.

## Compound 5-P

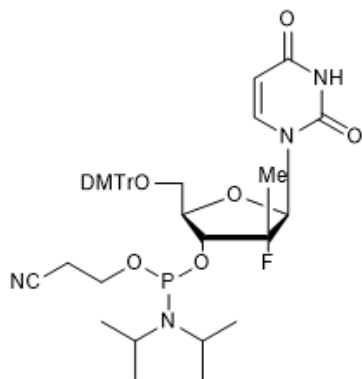

Yield: 50 mg, 0.066 mmol (74%) from 50 mg, 0.089 mmol

**<sup>1</sup>H NMR (400 MHz, CD<sub>3</sub>CN)**  $\delta_{\text{H}}$  (ppm) 9.19 (s, 1H), 7.90 (dd,  $J = 11.48, 8.26$  Hz, 1H), 7.43 (d,  $J = 7.66$  Hz, 2H), 7.36-7.24 (m, 6 or 7H), 6.92-6.86 (m, 4H), 6.13 (d,  $J = 18.93$  Hz, 1H), 5.06 (dd,  $J = 11.52, 8.25$  Hz, 1H), 4.50-4.30 (m, 1H), 4.11 (t,  $J = 9.68$  Hz, 1H), 3.89-3.81 (m, 1H), 3.77 (d,  $J = 2.43$  Hz, 6H), 3.72-3.44 (m, 6H), 2.67 (t,  $J = 5.75$  Hz, 1H), 2.44 (t,  $J = 4.46$  Hz, 1H), 1.45 (dd,  $J = 22.58, 1.98$  Hz, 3H), 1.19-0.97 (m, 12H).

**<sup>13</sup>C NMR (100 MHz, CD<sub>3</sub>CN)**  $\delta_{\text{C}}$  (ppm) 163.6, 159.9, 159.8, 151.5, 145.7, 140.9, 136.4, 136.3, 136.3, 136.2, 131.4, 131.3, 131.3, 129.3, 129.2, 129.0, 129.0, 128.1, 128.1, 119.6, 119.4, 114.2, 114.1, 103.1, 103.1, 102.5, 102.3, 87.8, 7.8, 81.3, 81.2, 81.1, 74.7, 74.6, 74.2, 61.8, 61.4, 59.4, 59.2, 59.0, 58.9, 55.9, 55.9, 44.1, 44.0, 25.0, 24.9, 24.9, 24.8, 24.7, 21.0, 20.9, 20.9, 18.2, 18.1, 17.9, 17.9, 17.6, 17.3.

**<sup>31</sup>P NMR (162 MHz, CD<sub>3</sub>CN)**  $\delta_{\text{P}}$  (ppm) 150.64, 149.31.

**<sup>19</sup>F NMR (376 MHz, CD<sub>3</sub>CN)**  $\delta_{\text{F}}$  (ppm) -159.72.

**HRMS (ESI)**  $m/z$   $[M+H]^+$  calc. for C<sub>40</sub>H<sub>49</sub>FN<sub>4</sub>O<sub>8</sub>P 763.3267, found 763.3271

## Compound 6-P

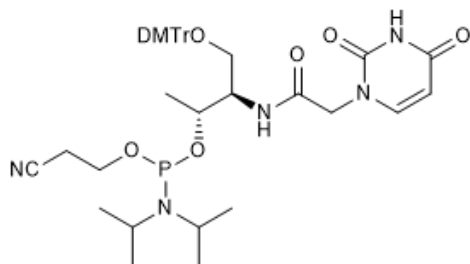

Yield: 0.95 g, 1.25 mmol (54%) from 1.30 g, 2.33 mmol

**<sup>1</sup>H NMR (400 MHz, CD<sub>3</sub>CN)**  $\delta_{\text{H}}$  (ppm) 9.13 (broad s, 1H), 7.42 (d,  $J = 7.21$  Hz, 2H), 7.33-7.27 (m, 7H), 7.23 (tt,  $J = 7.22$  Hz, 1.16 Hz, 1H), 6.86 (d,  $J = 8.93$  Hz, 4H), 6.53 (d,  $J = 9.12$  Hz, 1H), 5.58 (d,  $J = 7.90$  Hz, 1H), 4.38 (d,  $J = 16.40$  Hz, 1H), 4.36 (d,  $J = 16.43$  Hz, 1H), 4.25-4.10 (m, 2H), 3.77 (s, 6H), 3.59-3.45 (m, 4H), 3.15-3.06 (m, 2H), 2.48 (t,  $J = 5.97$  Hz, 2H), 1.16-1.07 (m, 15H)

**<sup>13</sup>C NMR (100 MHz, CD<sub>3</sub>CN)**  $\delta_{\text{C}}$  (ppm) 167.8, 164.4, 159.6, 151.9, 147.0, 146.9, 146.1, 137.0, 137.0, 131.0, 129.0, 128.8, 128.8, 127.7, 119.6, 114.0, 101.9, 86.8, 69.9, 69.7, 63.9, 59.5, 59.3, 55.9, 55.4, 55.4, 51.0, 43.9, 43.8, 25.0, 24.9, 24.7, 24.6, 21.0, 20.9, 19.5, 19.4

**<sup>31</sup>P NMR (162 MHz, CD<sub>3</sub>CN)**  $\delta_{\text{P}}$  (ppm) 147.4, 146.9

**HRMS (ESI)**  $m/z$  [M+Na]<sup>+</sup> calc. for C<sub>40</sub>H<sub>51</sub>N<sub>5</sub>O<sub>8</sub>P 760.3470, found 760.3471

## 2-Cyanoethyl *N,N*-diisopropylphosphonamidate Reference

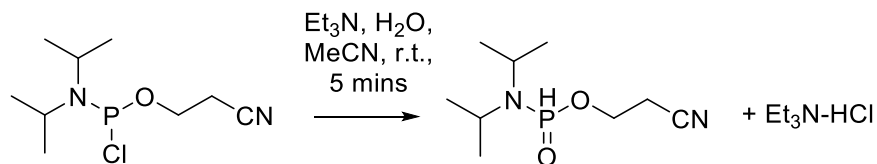

To a 4 mL flame-dried glass vial containing 2 mL dry MeCN was added  $\text{PCl}$  (22  $\mu\text{L}$ , 0.10 mmol, 1.0 eq),  $\text{Et}_3\text{N}$  (70  $\mu\text{L}$ , 0.50 mmol, 5.0 eq) and  $\text{H}_2\text{O}$  (9  $\mu\text{L}$ , 0.50 mmol, 5.0 eq). The mixture was stirred 5 minutes at room temperature and then concentrated under reduced pressure to give the desired H-phosphonate and the triethylamine hydrochloride salt.

$^1\text{H NMR}$  (400 MHz,  $\text{CD}_3\text{CN}$ )  $\delta_{\text{H}}$  (ppm) 11.75 (s, broad,  $\text{Et}_3\text{N-HCl}$ ), 7.65+6.06 (d,  $J_{\text{P-H}} = 636.10$  Hz, 1H), 4.15-3.99 (m, 2H), 3.55-3.41 (m, 2H), 3.07-2.99 (m, 2H +  $\text{Et}_3\text{N-HCl}$ ), 2.76 (t,  $J = 5.94$  Hz, 2H), 1.28 (t,  $J = 7.30$  Hz,  $\text{Et}_3\text{N-HCl}$ ), 1.22 (d,  $J = 5.36$  Hz, 6H), 1.22 (d,  $J = 5.33$  Hz, 6H)

$^{31}\text{P NMR}$  (162 MHz,  $\text{CD}_3\text{CN}$ )  $\delta_{\text{P}}$  (ppm) 13.75

## 9AJ Reference

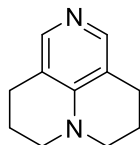

$^1\text{H NMR}$  (400 MHz,  $\text{CD}_3\text{CN}$ )  $\delta_{\text{H}}$  (ppm) 7.68 (s, 2H), 3.20 (t,  $J = 5.66$  Hz, 4H), 2.62 (t,  $J = 6.33$  Hz, 4H), 1.88 (quintet,  $J = 6.0$  Hz, 4 H)



## NMR Spectra of P(III)-loaded Resins

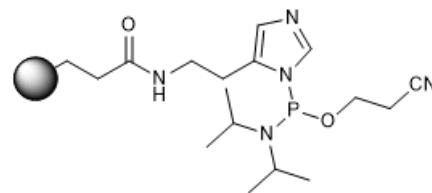

Gel Phase  $^{31}\text{P}$  NMR (162 MHz, MeCN) of **TG-Het1** (loaded)

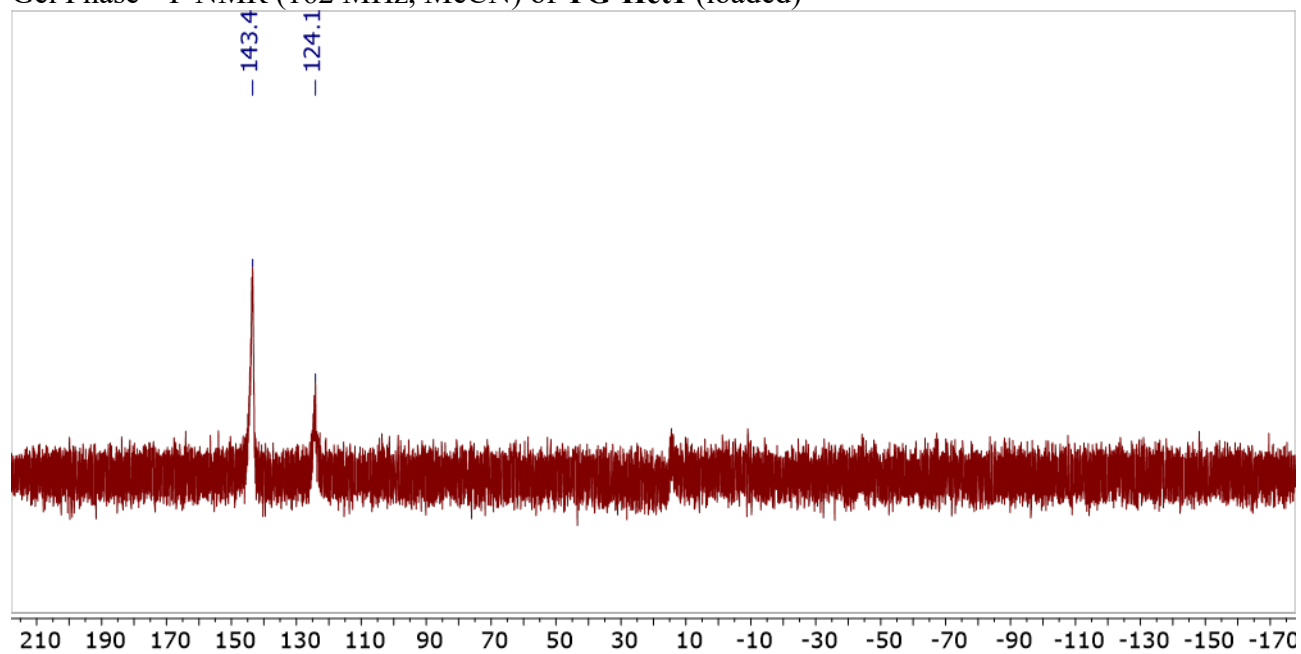

Gel Phase  $^{31}\text{P}$  NMR (162 MHz, MeCN) of **TG-Het1** (after MeOH elution)

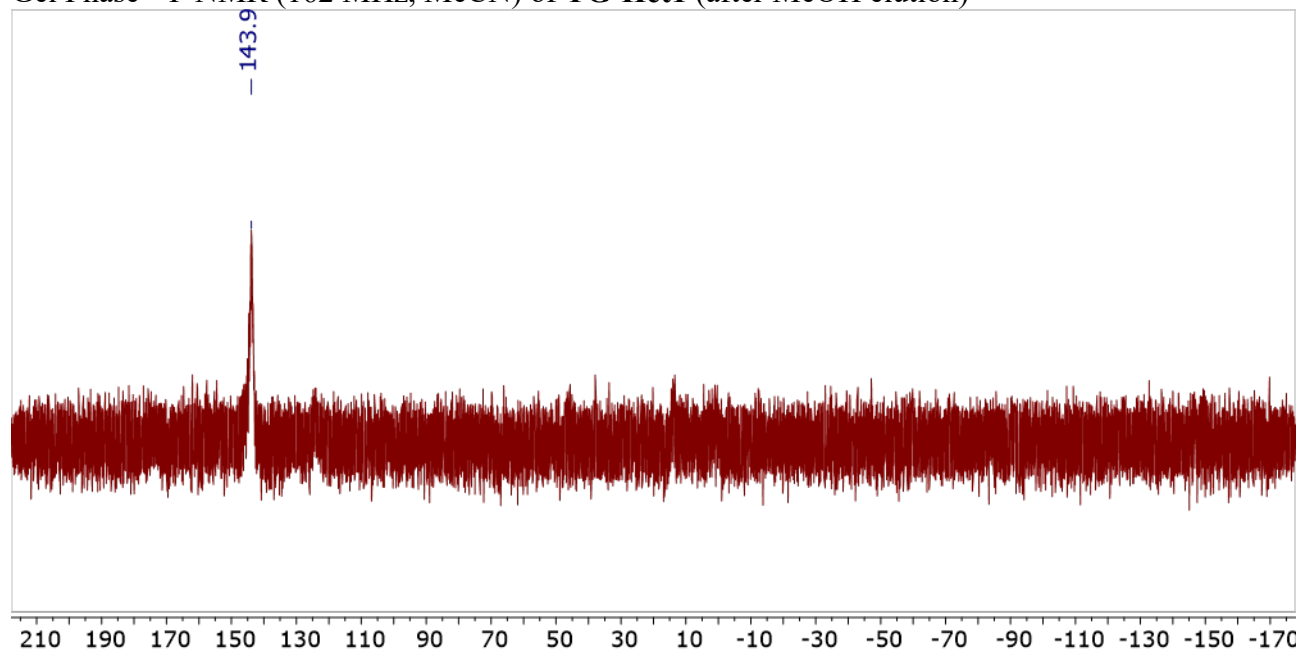

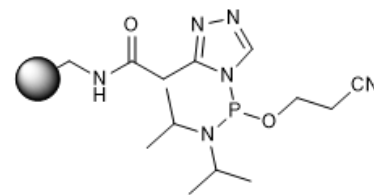

Gel Phase  $^{31}\text{P}$  NMR (162 MHz, MeCN) of **TG-Het2** (loaded)

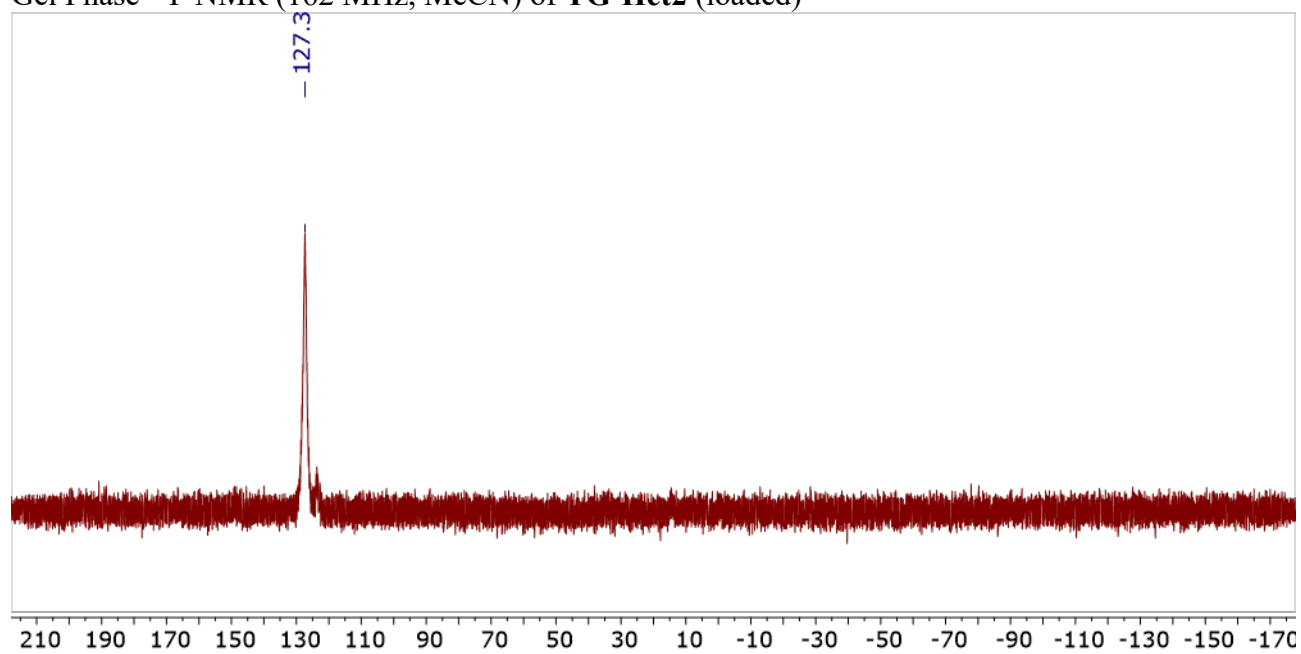

Gel Phase  $^{31}\text{P}$  NMR (162 MHz, MeCN) of **TG-Het2** (after MeOH elution)

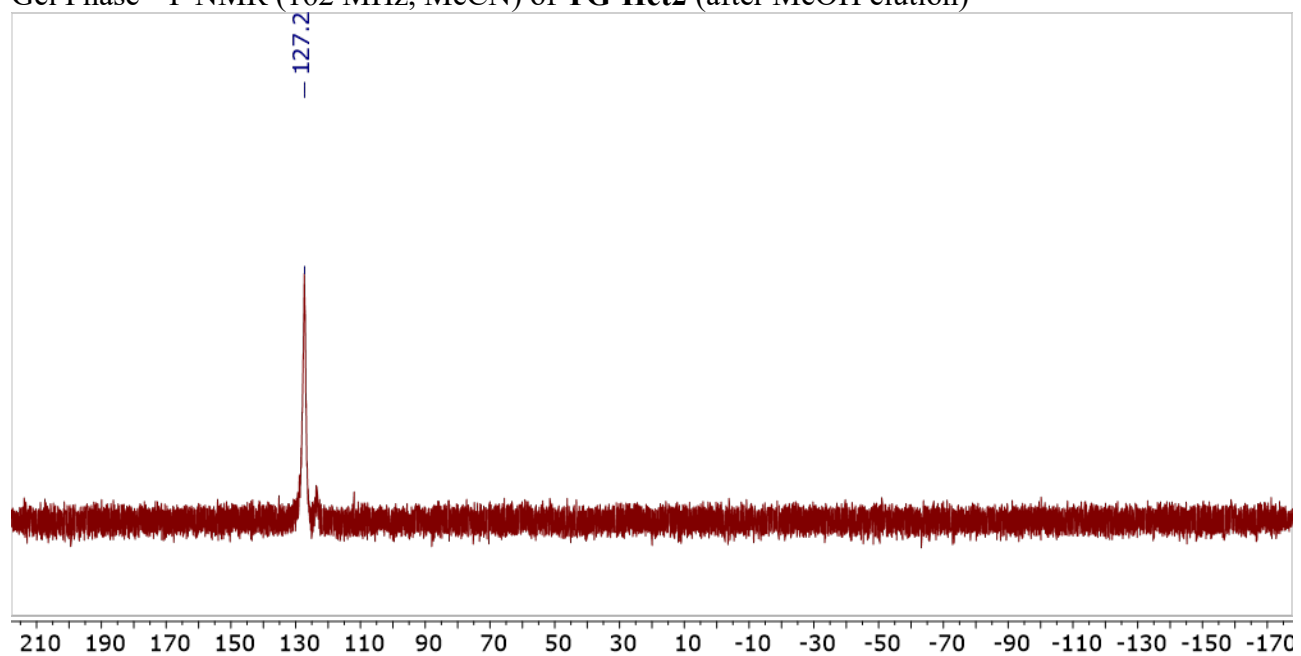

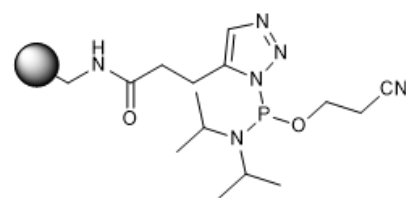

Gel Phase  $^{31}\text{P}$  NMR (162 MHz, MeCN) of **TG-Het3** (loaded)

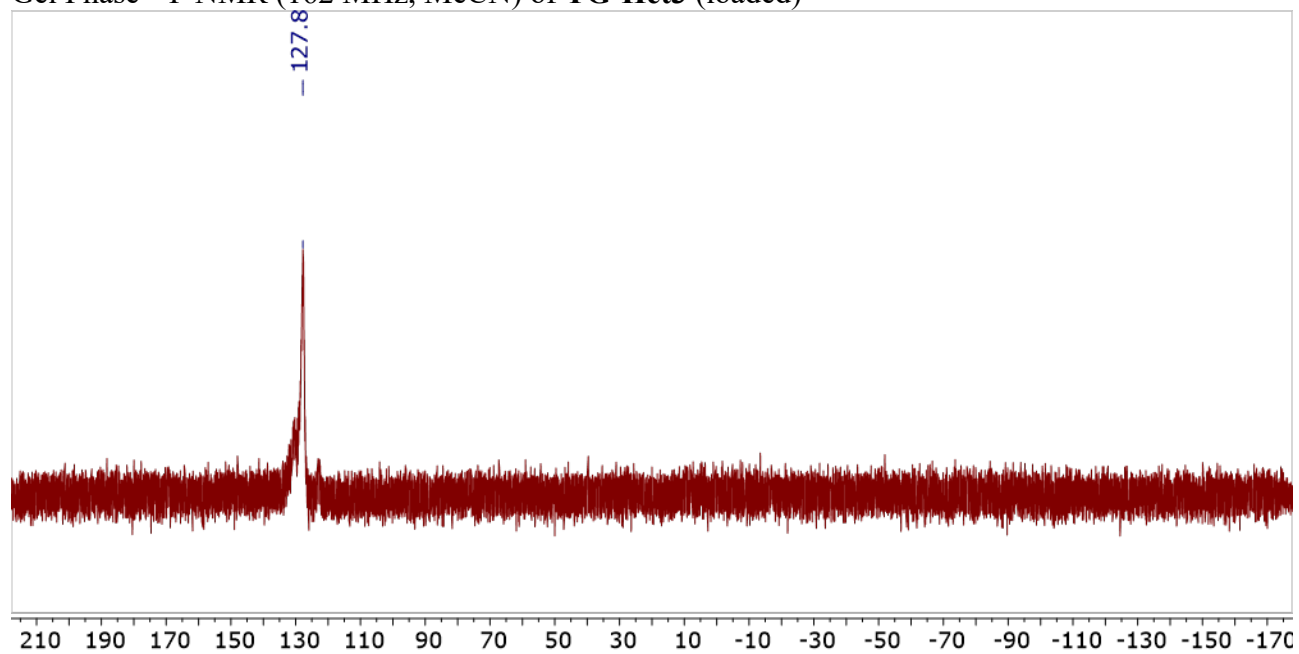

Gel Phase  $^{31}\text{P}$  NMR (162 MHz, MeCN) of **TG-Het3** (after MeOH elution)

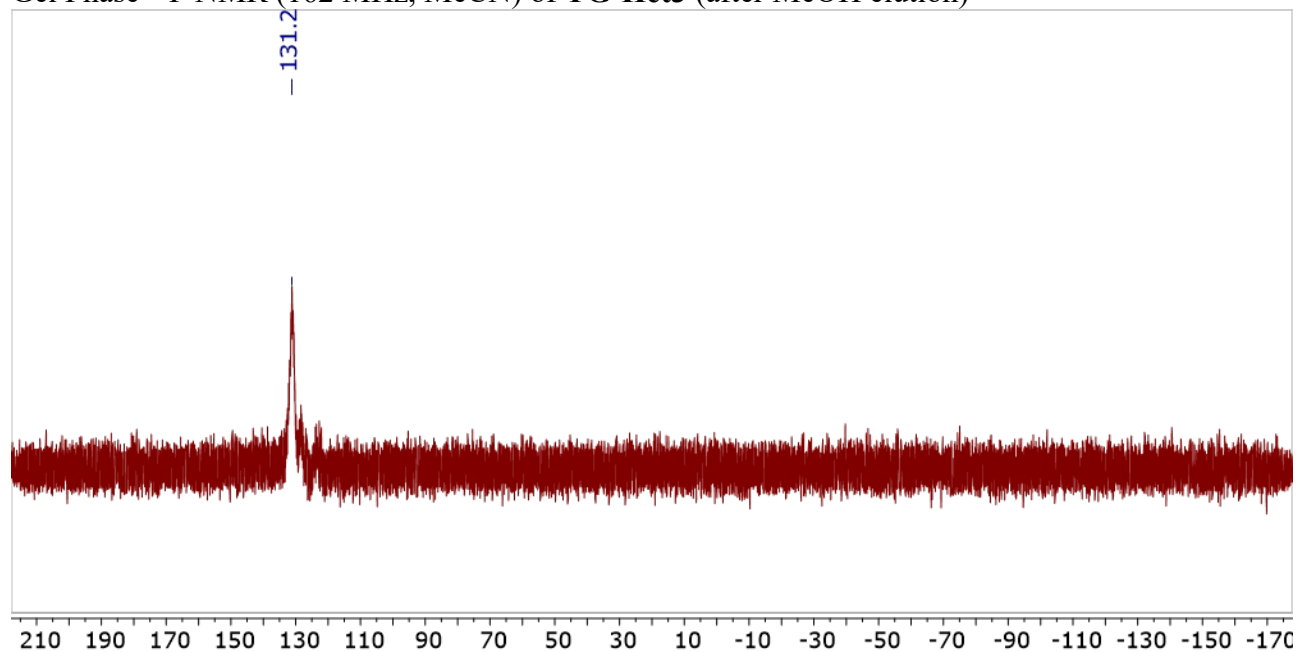

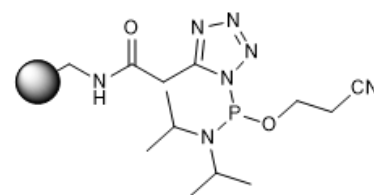

Gel Phase  $^{31}\text{P}$  NMR (162 MHz, MeCN) of **TG-Het4** (loaded)

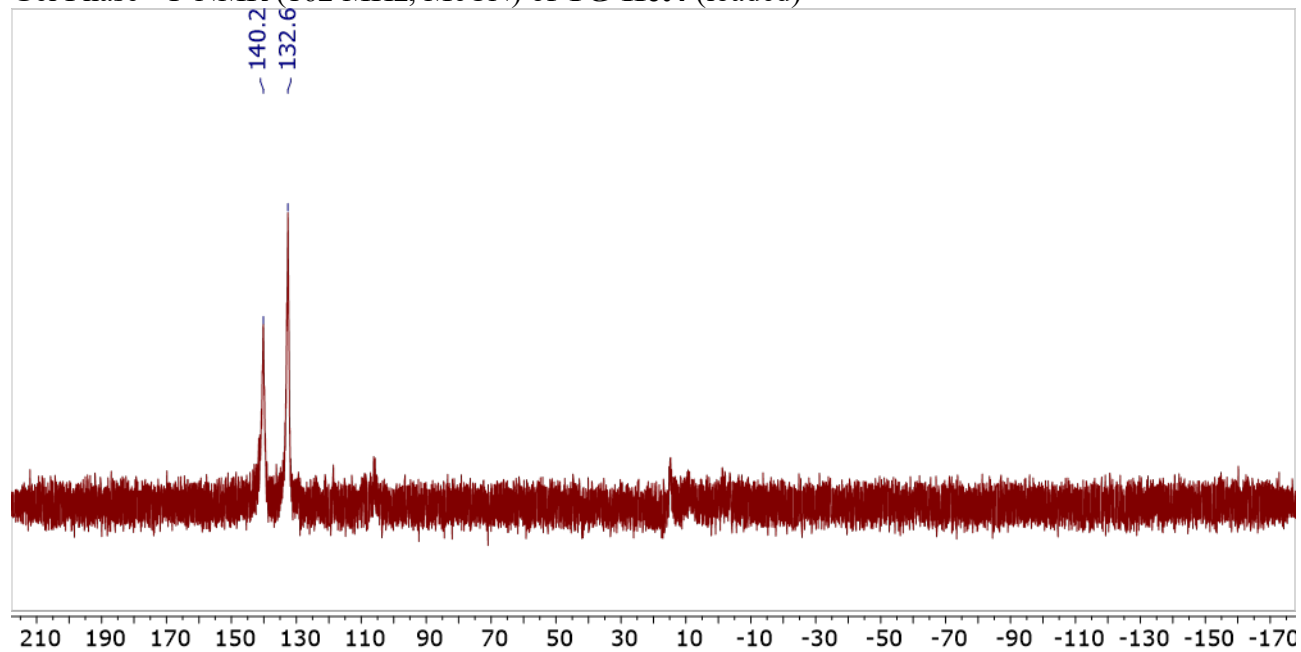

Gel Phase  $^{31}\text{P}$  NMR (162 MHz, MeCN) of **TG-Het4** (after MeOH elution)

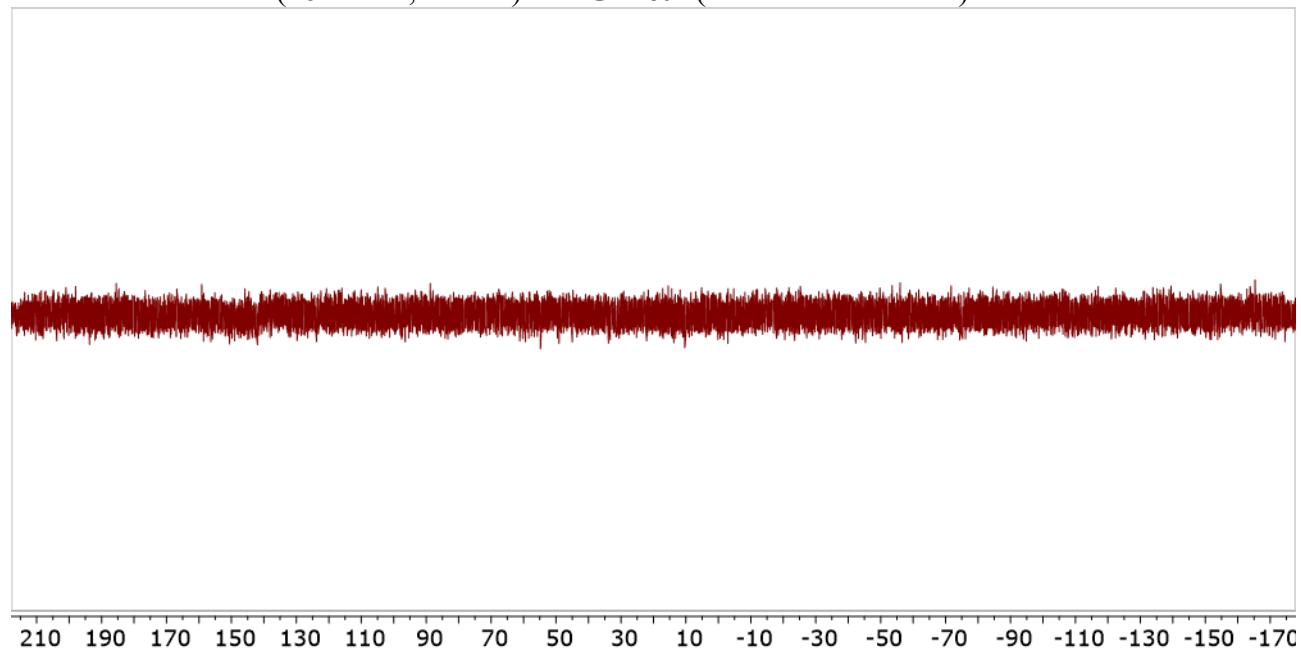

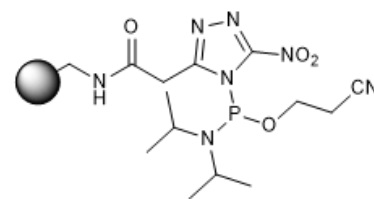

Gel Phase <sup>31</sup>P NMR (162 MHz, MeCN) of **TG-Het5.1** (loaded)

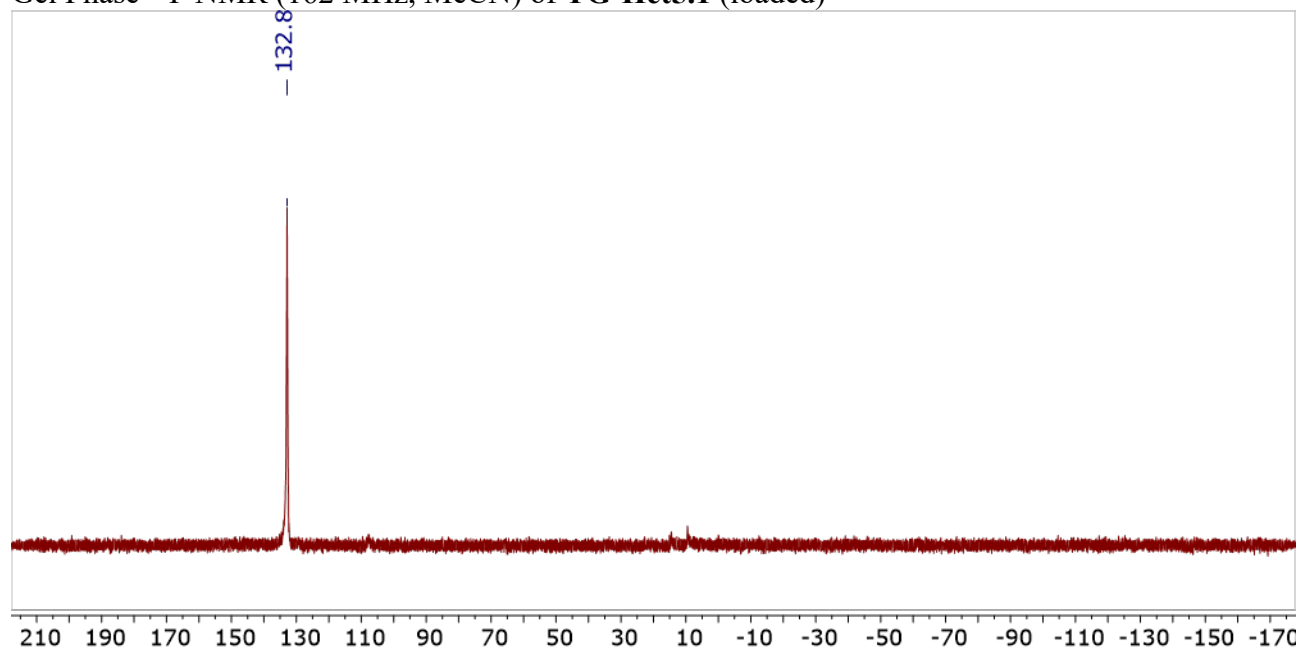

Gel Phase <sup>31</sup>P NMR (162 MHz, MeCN) of **TG-Het5.1** (after MeOH elution)

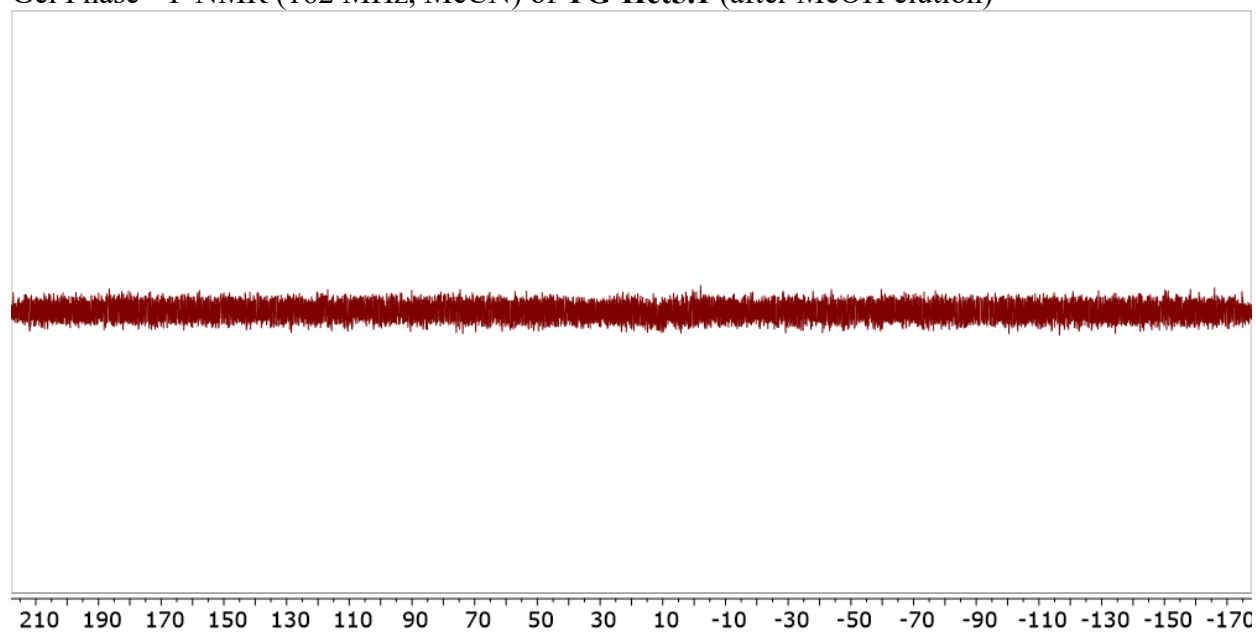

# NMR Spectra of Synthesized Starting Materials and Reference Products

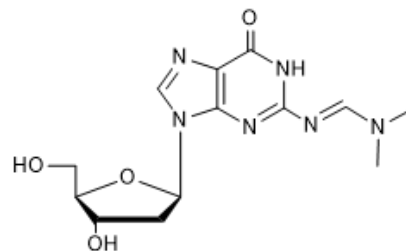

$^1\text{H}$  NMR ( $\text{CD}_3\text{CN}$ ) of 2-dmf-2'-Deoxyguanosine

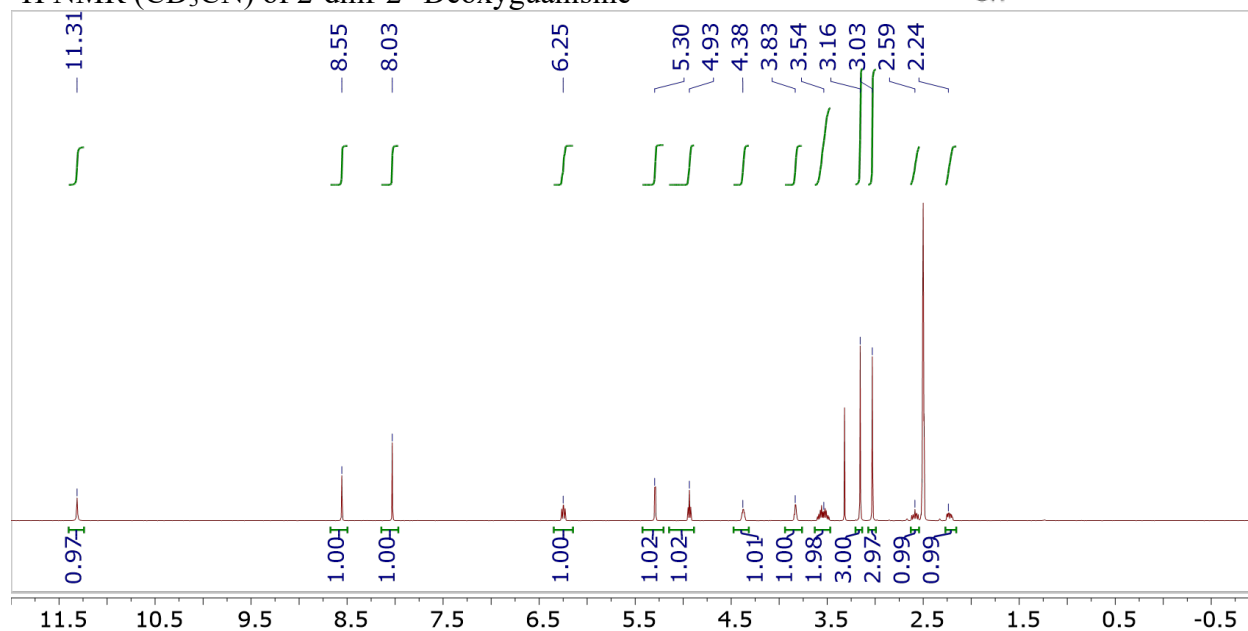

$^{13}\text{C}$  NMR ( $\text{CD}_3\text{CN}$ ) of 2-dmf-2'-Deoxyguanosine

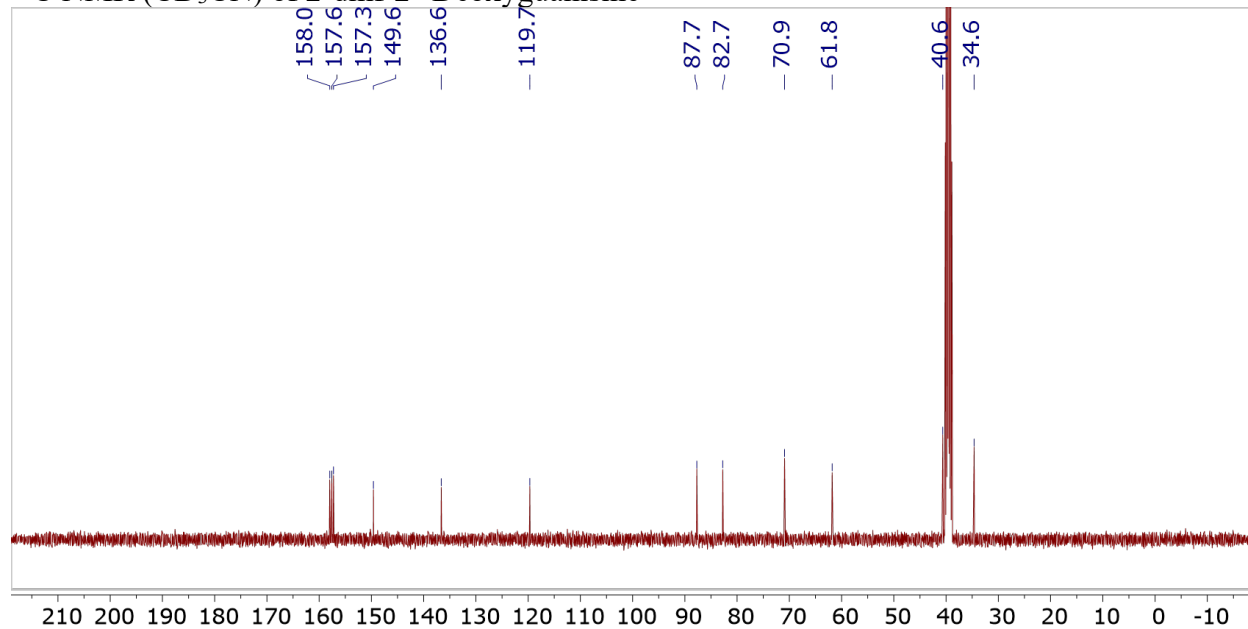

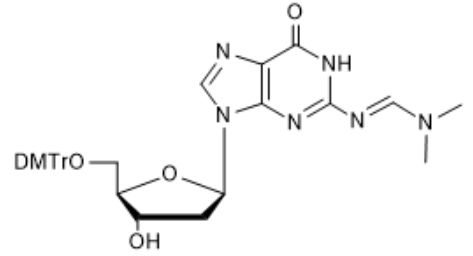

$^1\text{H}$  NMR ( $\text{CD}_3\text{CN}$ ) of **dmf-dG**

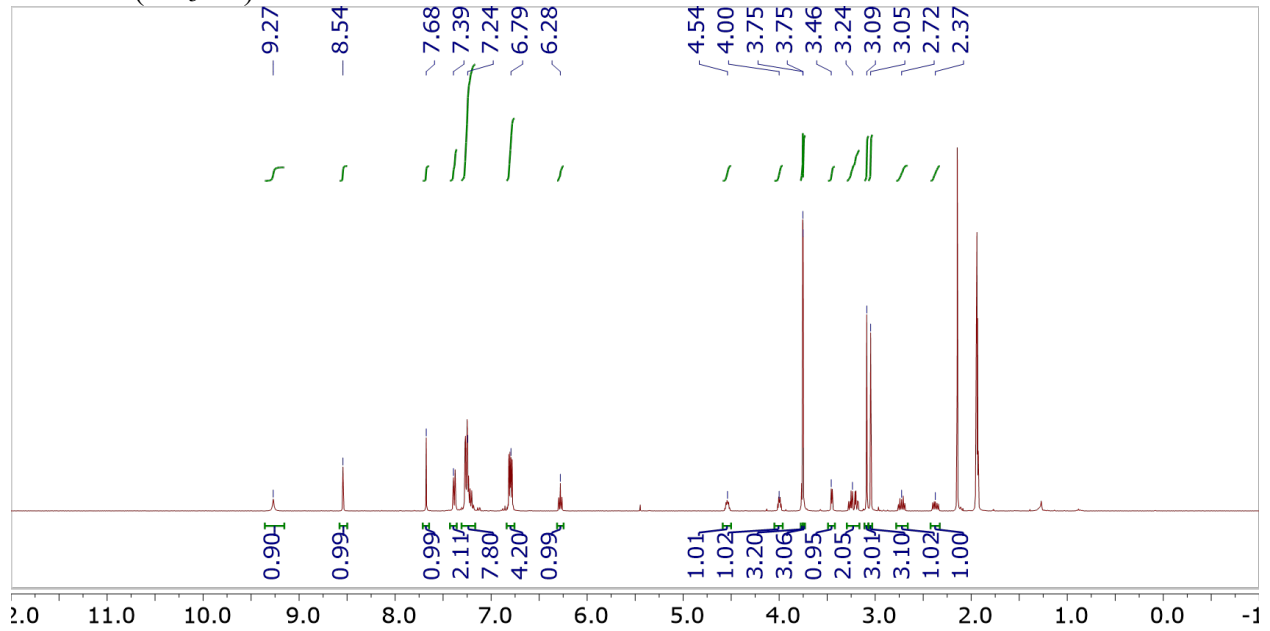

$^{13}\text{C}$  NMR ( $\text{CD}_3\text{CN}$ ) of **dmf-dG**

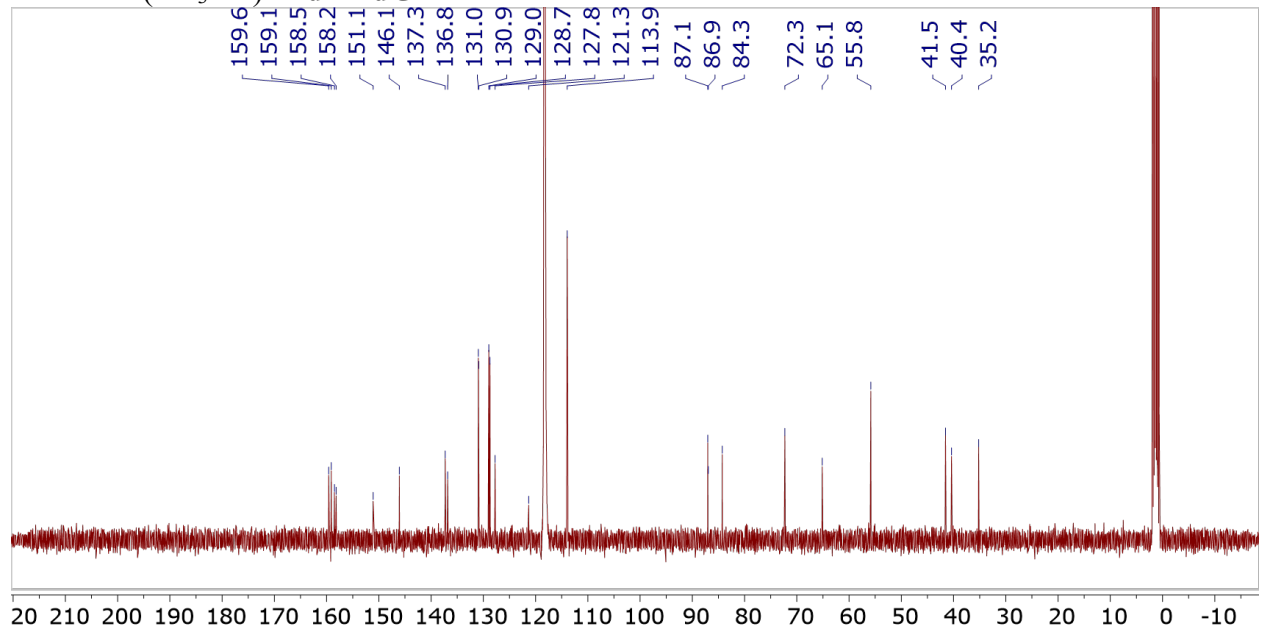

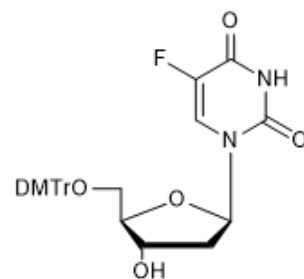

$^1\text{H}$  NMR ( $\text{CD}_3\text{CN}$ ) of **1**

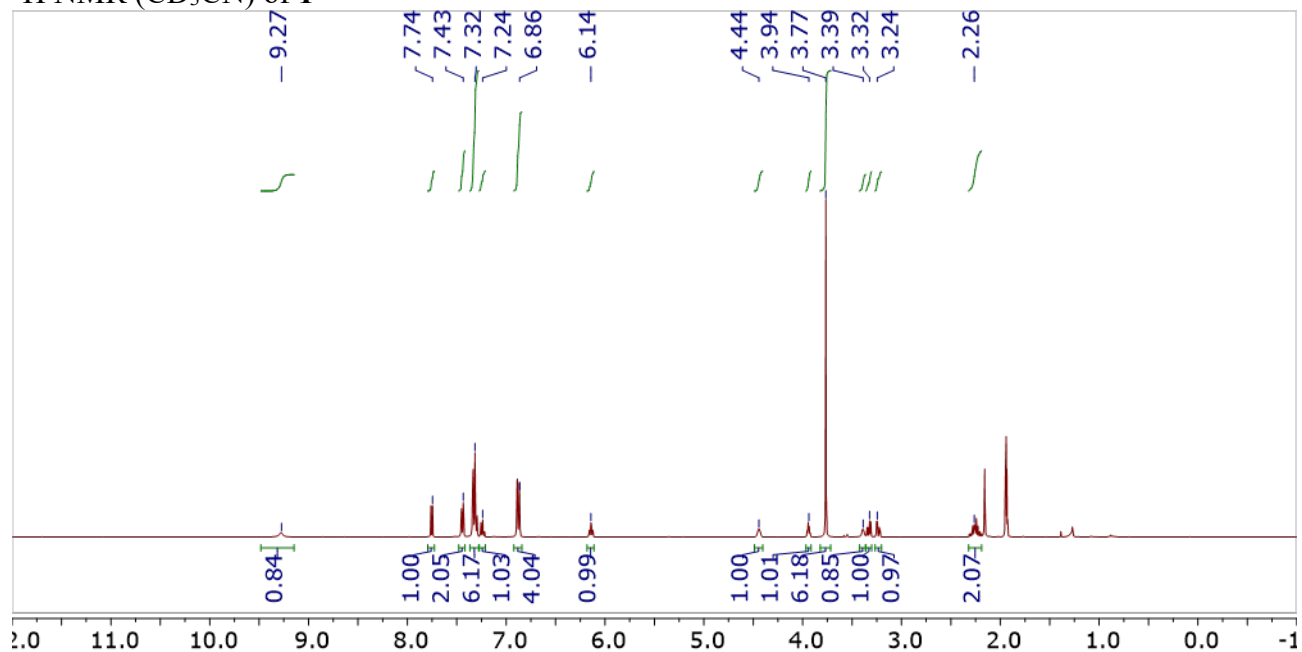

$^{13}\text{C}$  NMR ( $\text{CD}_3\text{CN}$ ) of **1**

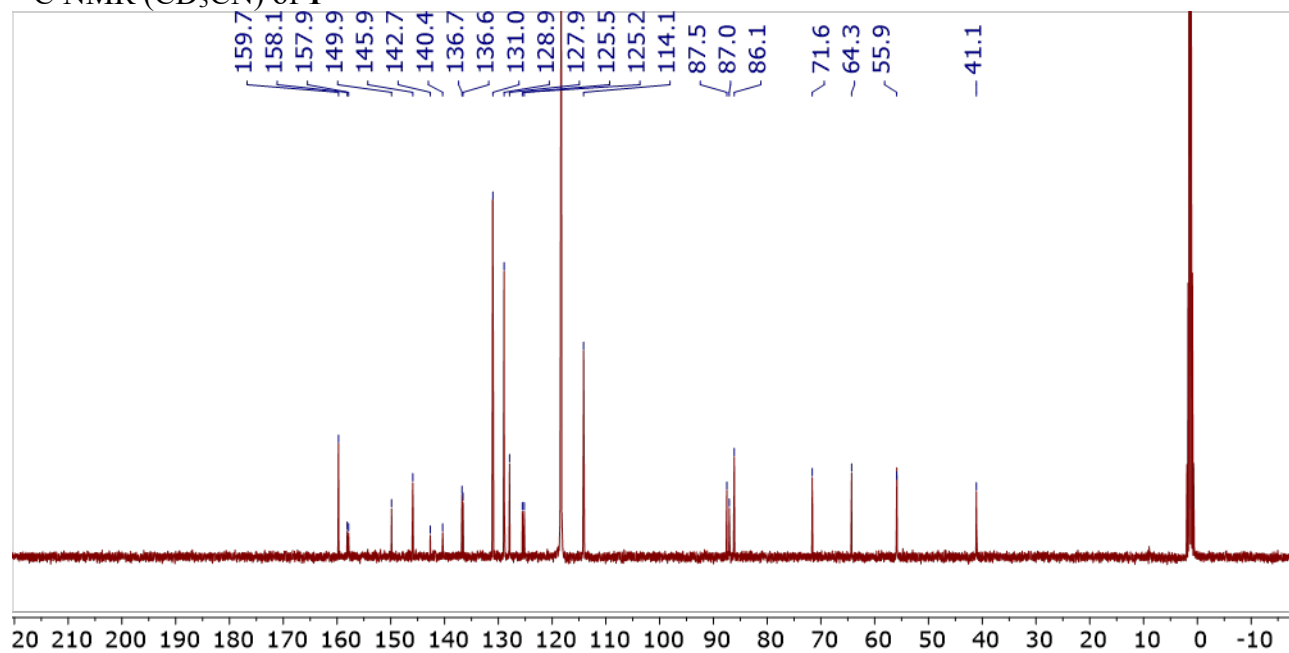



$^{19}\text{F}$  NMR ( $\text{CD}_3\text{CN}$ ) of **1**

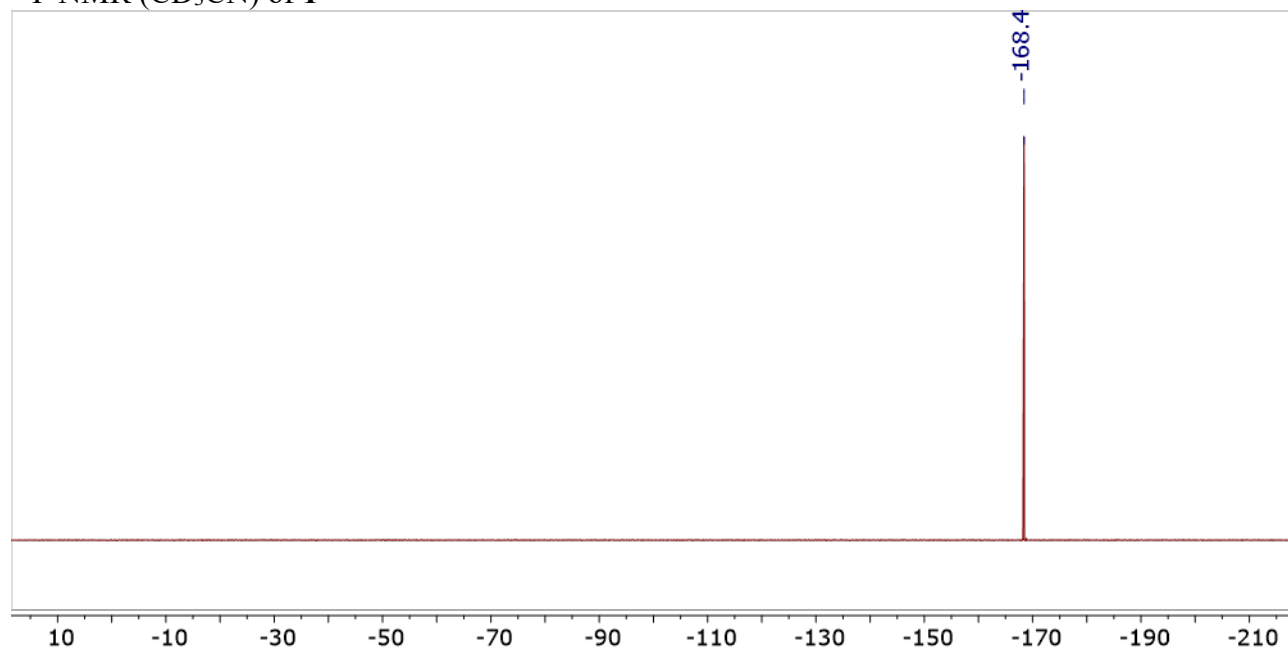

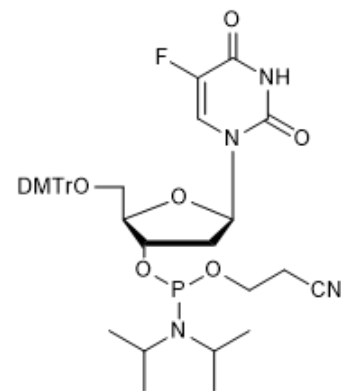

$^1\text{H}$  NMR ( $\text{CD}_3\text{CN}$ ) of **1-P**

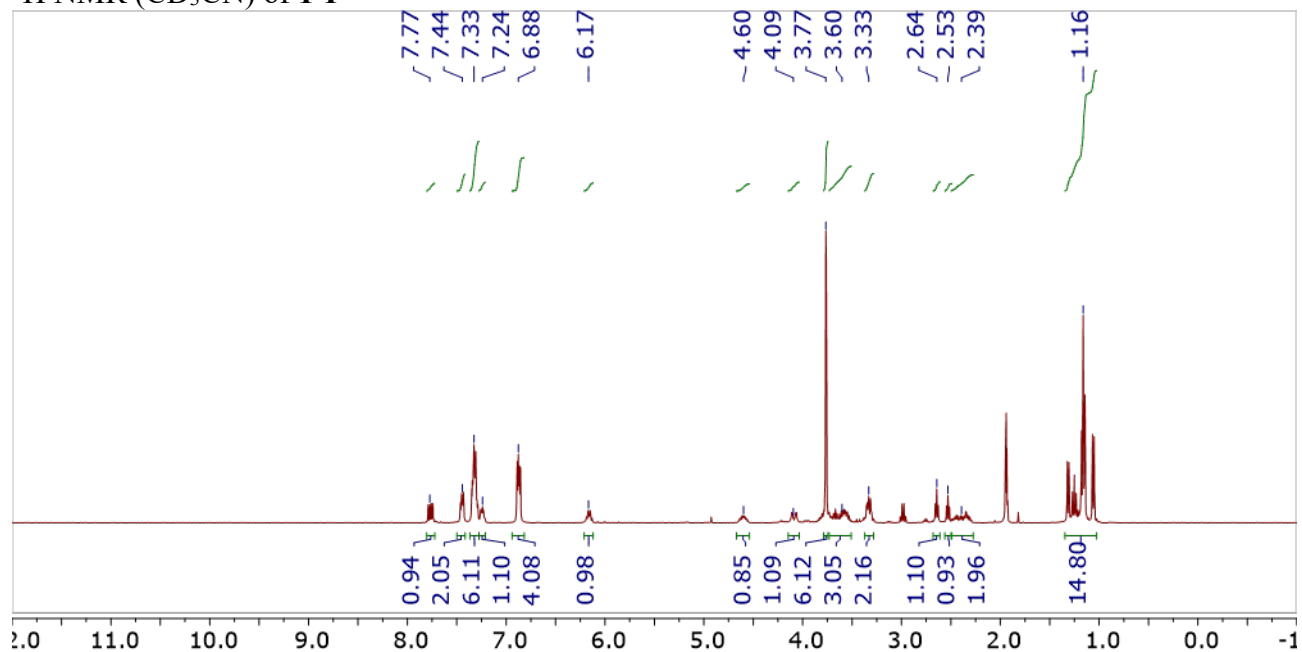

$^{13}\text{C}$  NMR ( $\text{CD}_3\text{CN}$ ) of **1-P**

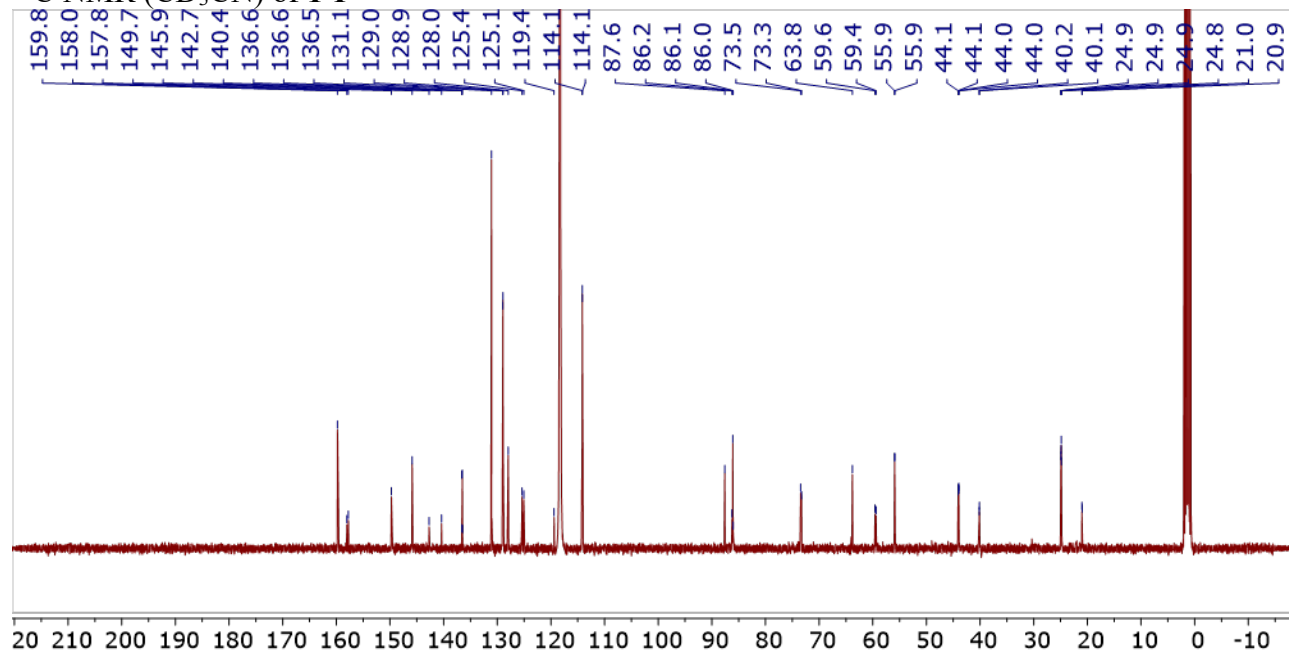

$^{19}\text{F}$  NMR ( $\text{CD}_3\text{CN}$ ) of **1-P**

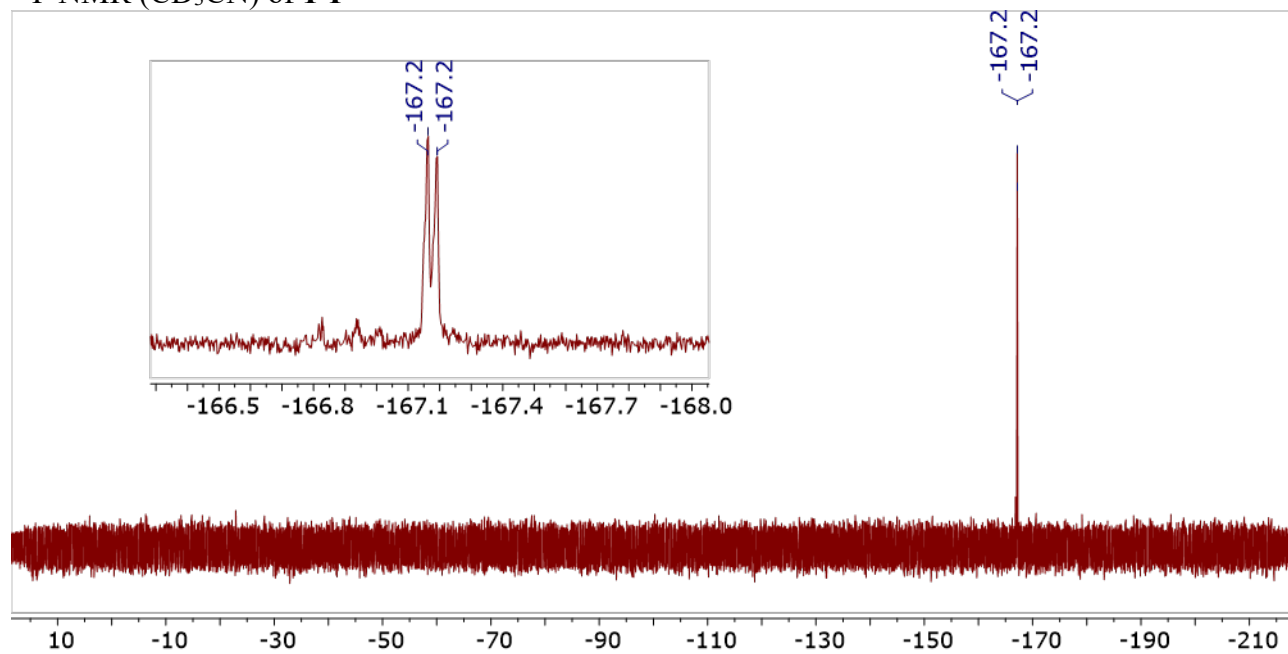

$^{31}\text{P}$  NMR ( $\text{CD}_3\text{CN}$ ) of **1-P**

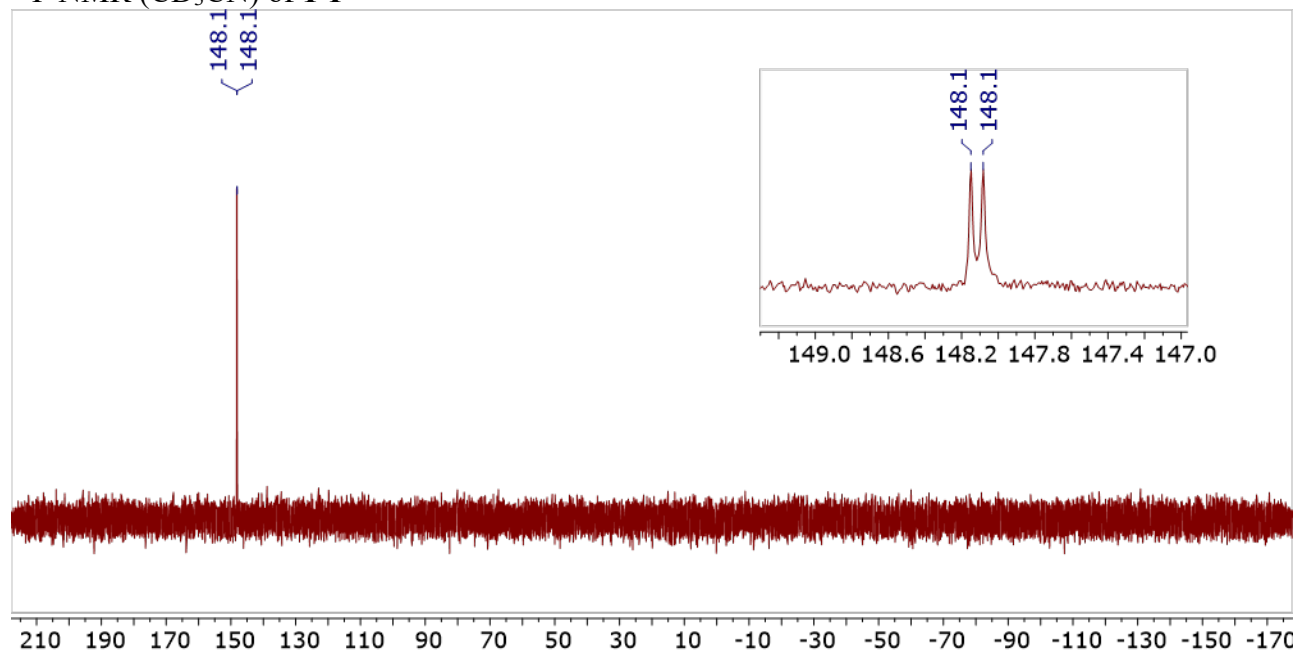

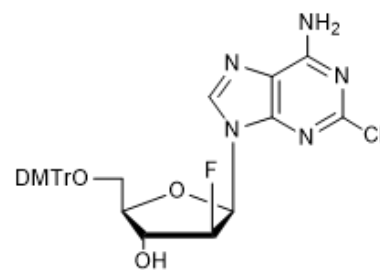

$^1\text{H}$  NMR ( $\text{CD}_3\text{CN}$ ) of **4.1**

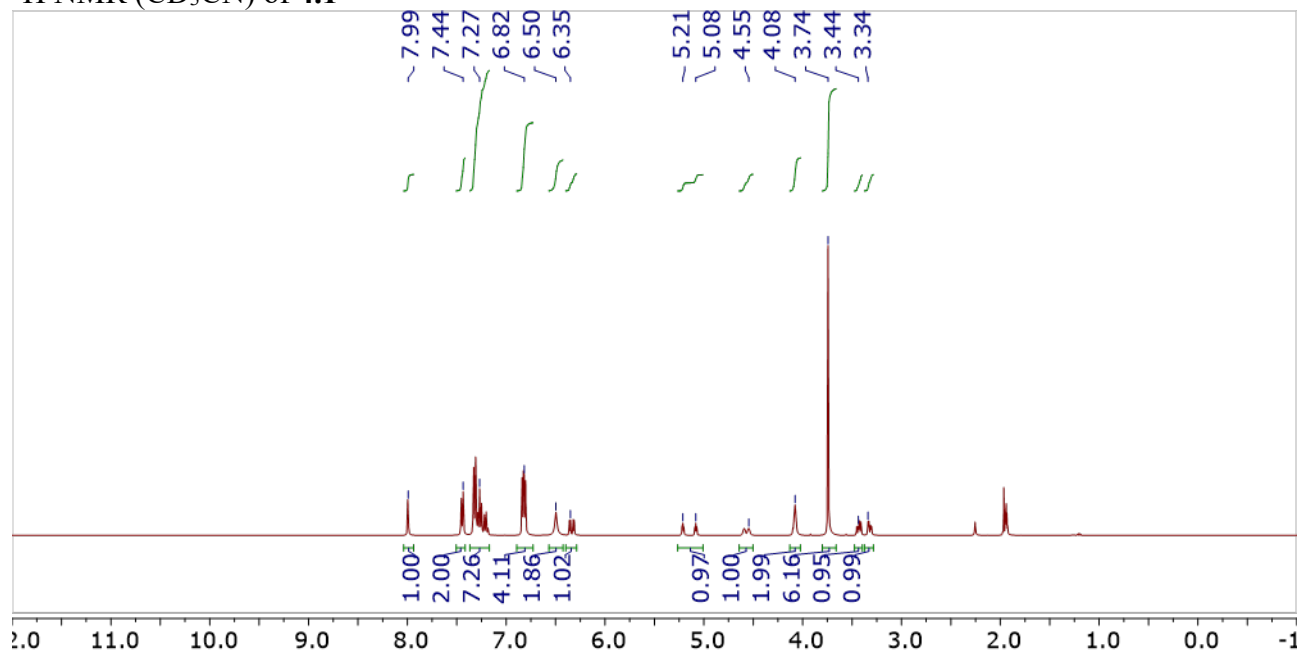

$^{13}\text{C}$  NMR ( $\text{CD}_3\text{CN}$ ) of **4.1**

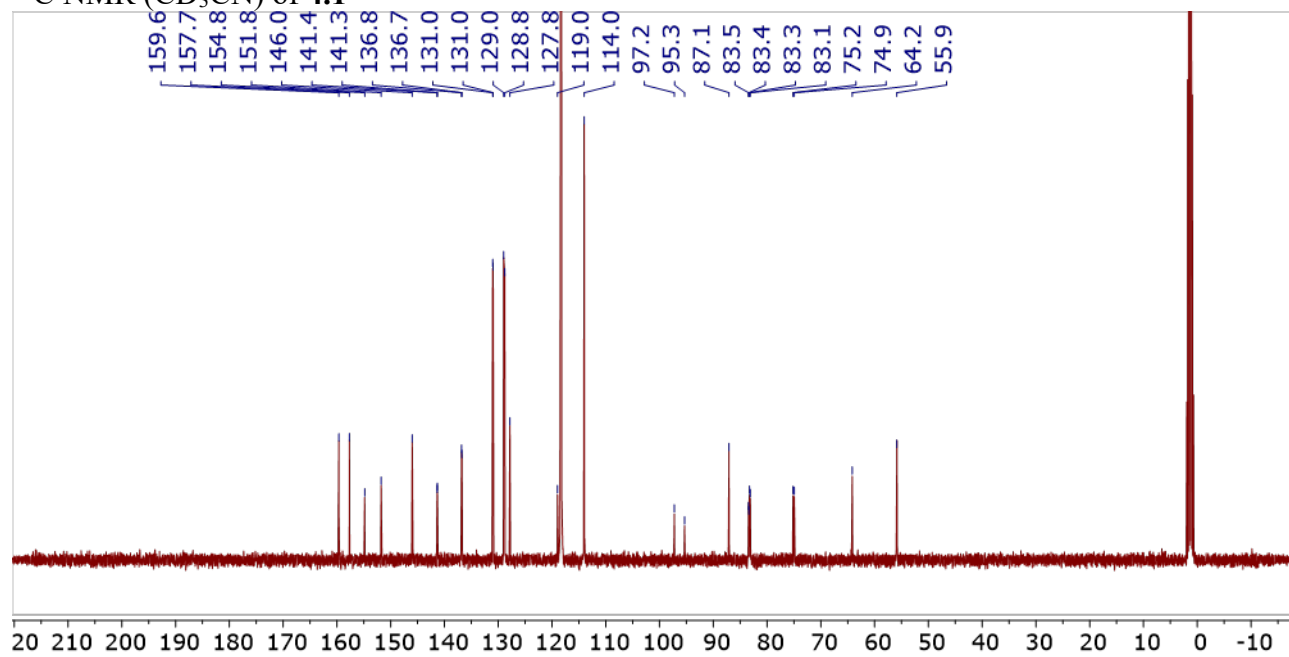

$^{19}\text{F}$  NMR ( $\text{CD}_3\text{CN}$ ) of **4.1**

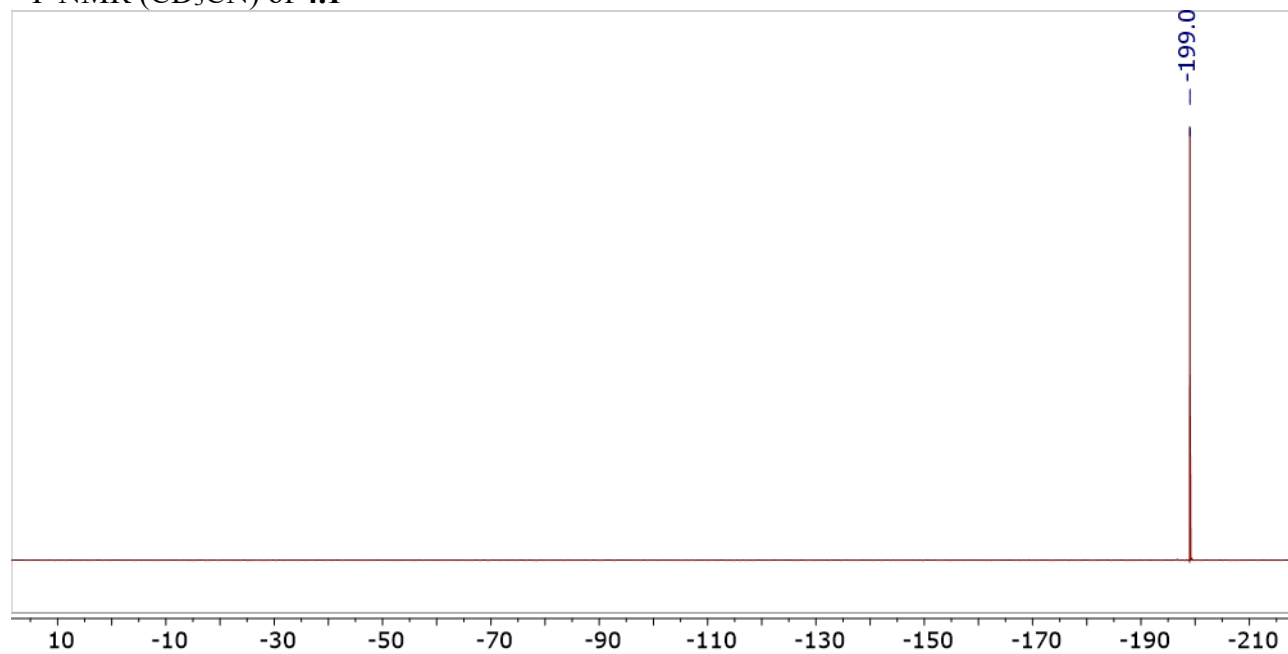

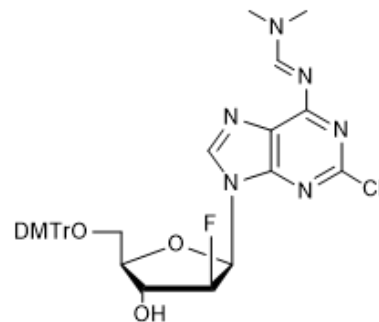

$^1\text{H}$  NMR ( $\text{CD}_3\text{CN}$ ) of 4

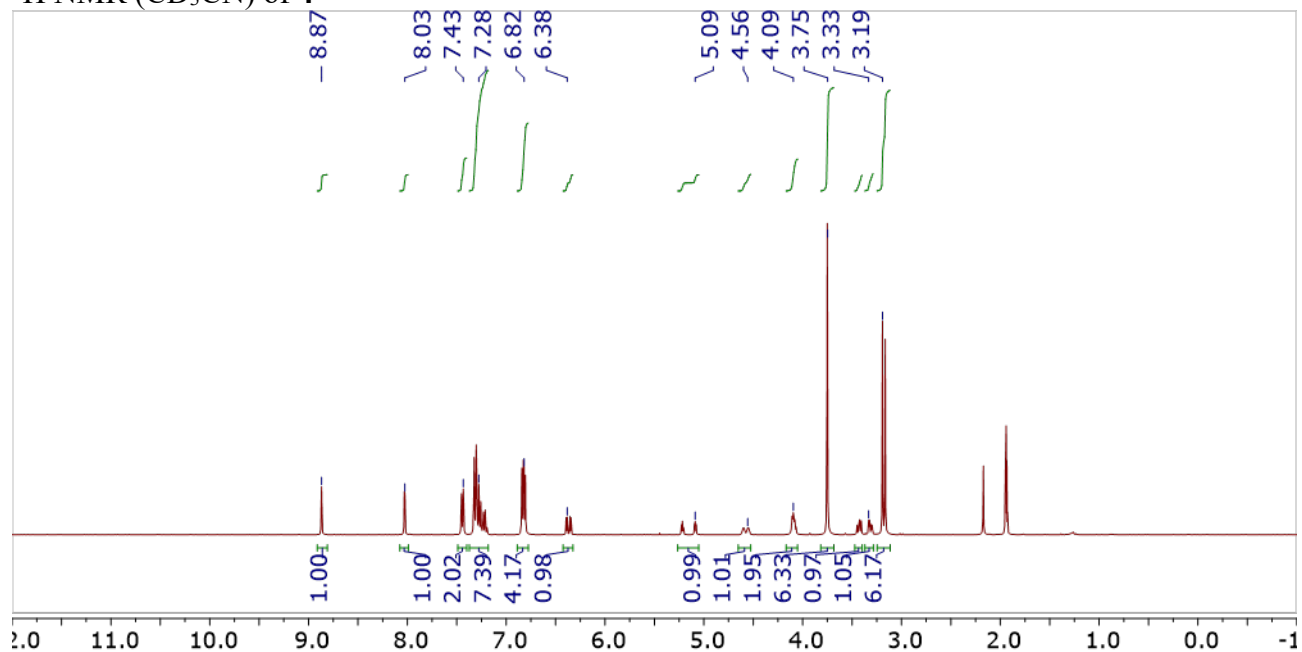

$^{13}\text{C}$  NMR ( $\text{CD}_3\text{CN}$ ) of 4

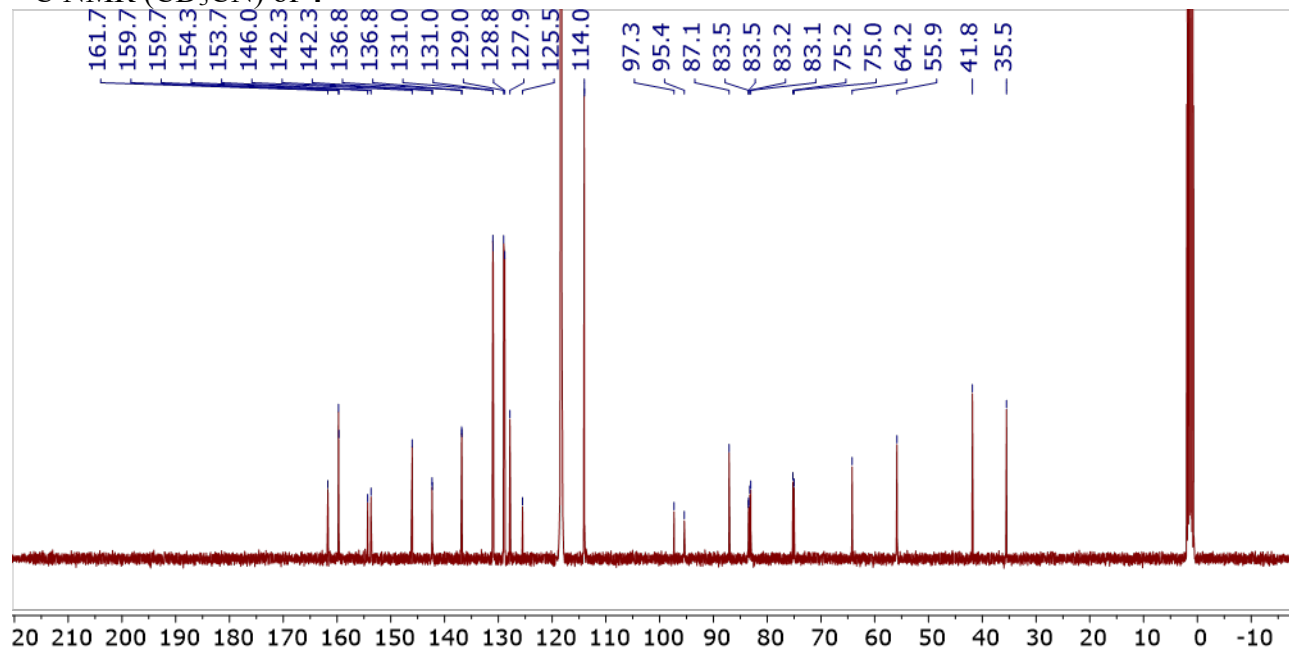

$^{19}\text{F}$  NMR ( $\text{CD}_3\text{CN}$ ) of **4**

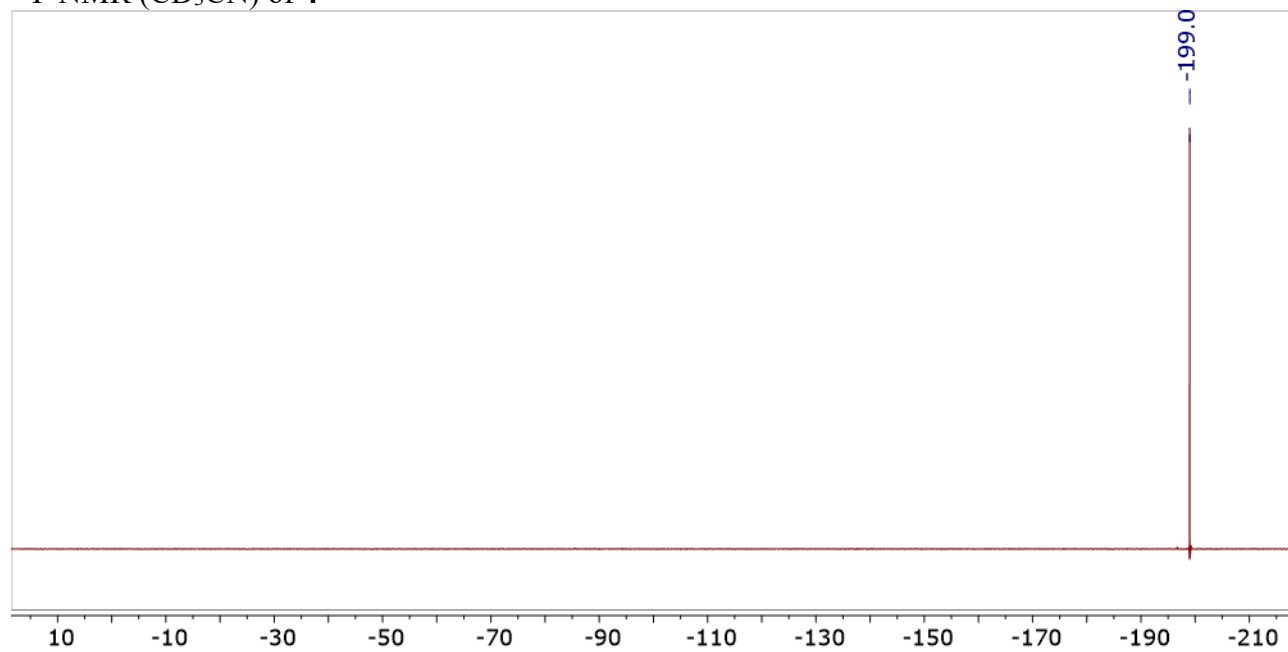

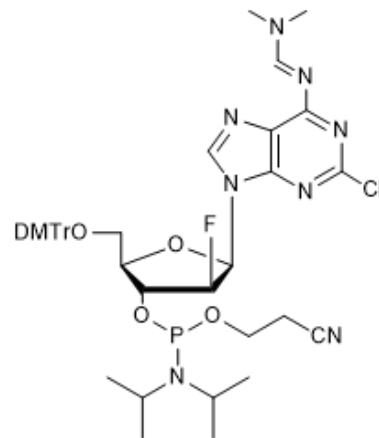

$^1\text{H}$  NMR ( $\text{CD}_3\text{CN}$ ) of **4-P**

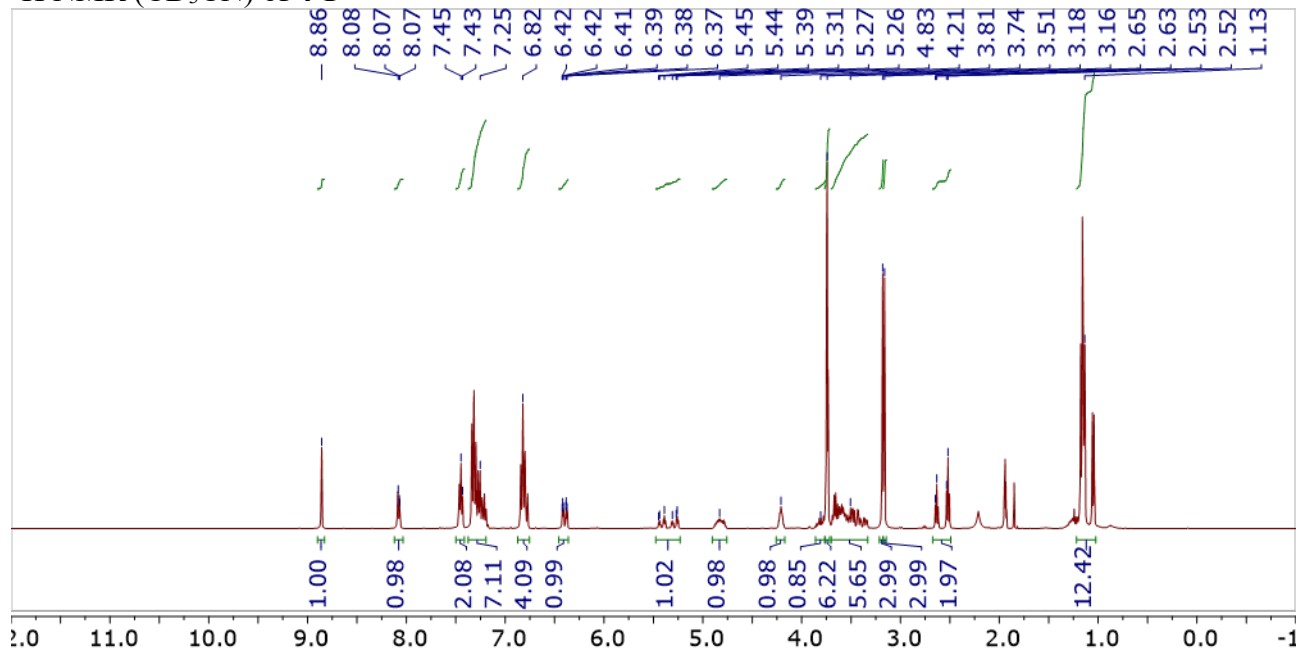

$^{13}\text{C}$  NMR ( $\text{CD}_3\text{CN}$ ) of **4-P**

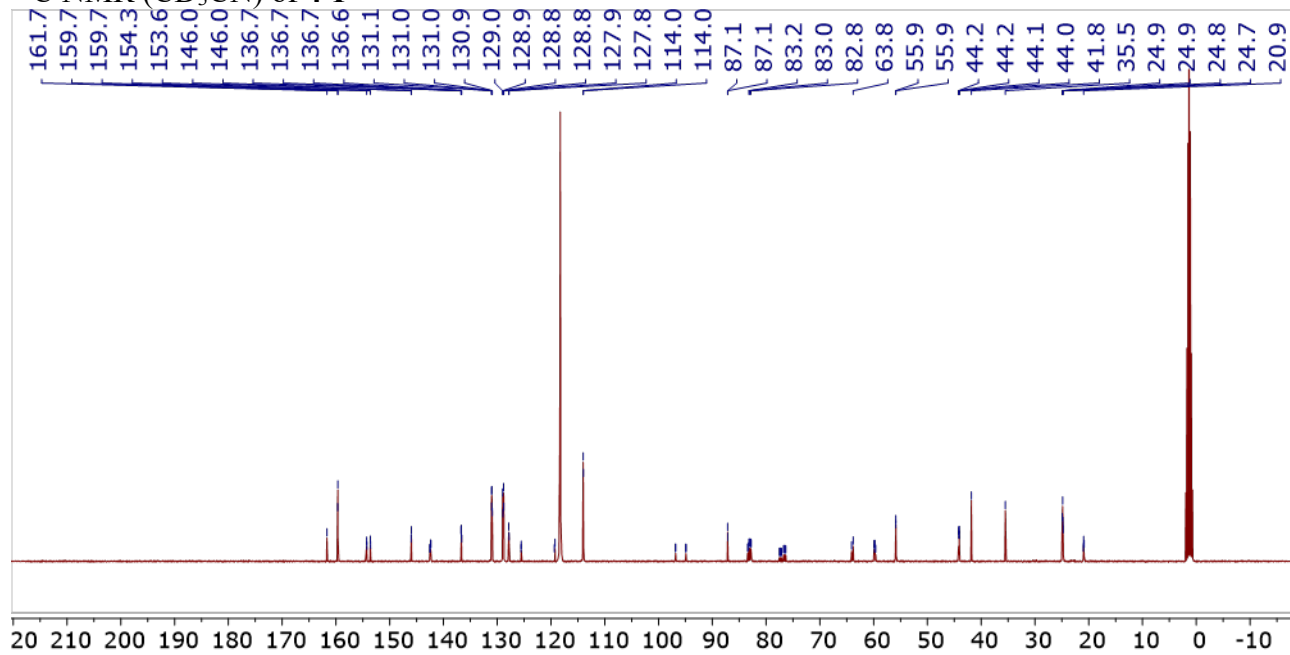



$^{19}\text{F}$  NMR ( $\text{CD}_3\text{CN}$ ) of **4-P**

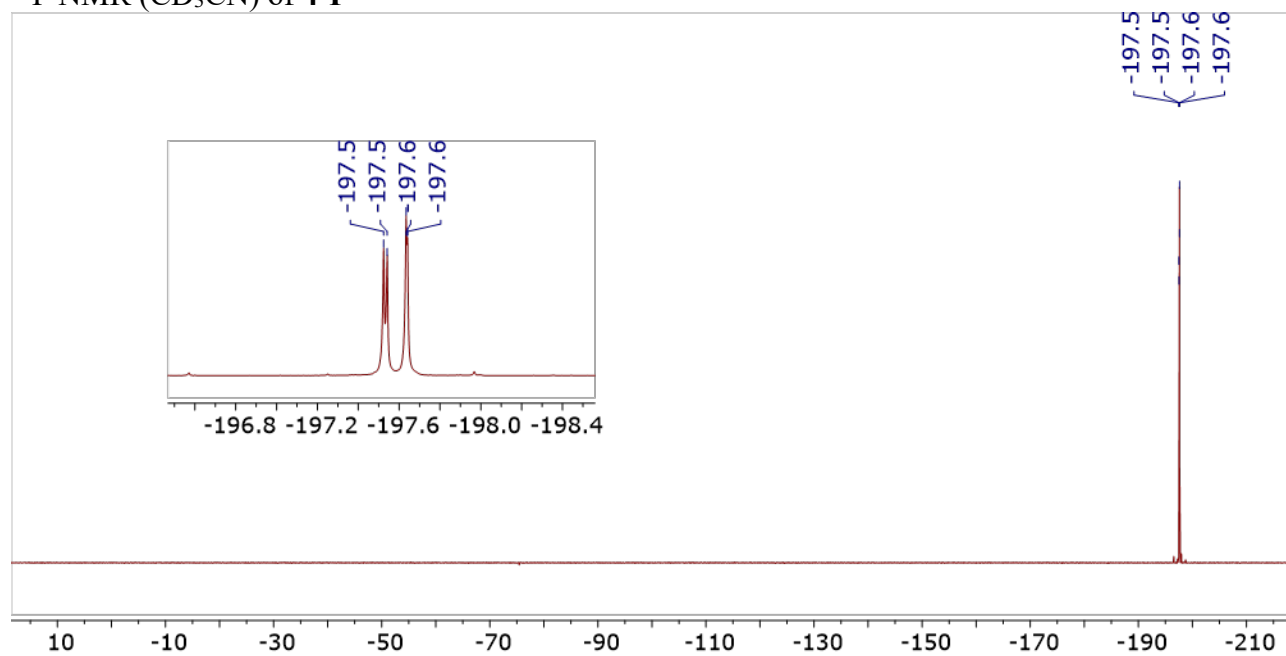

$^{31}\text{P}$  NMR ( $\text{CD}_3\text{CN}$ ) of **4-P**

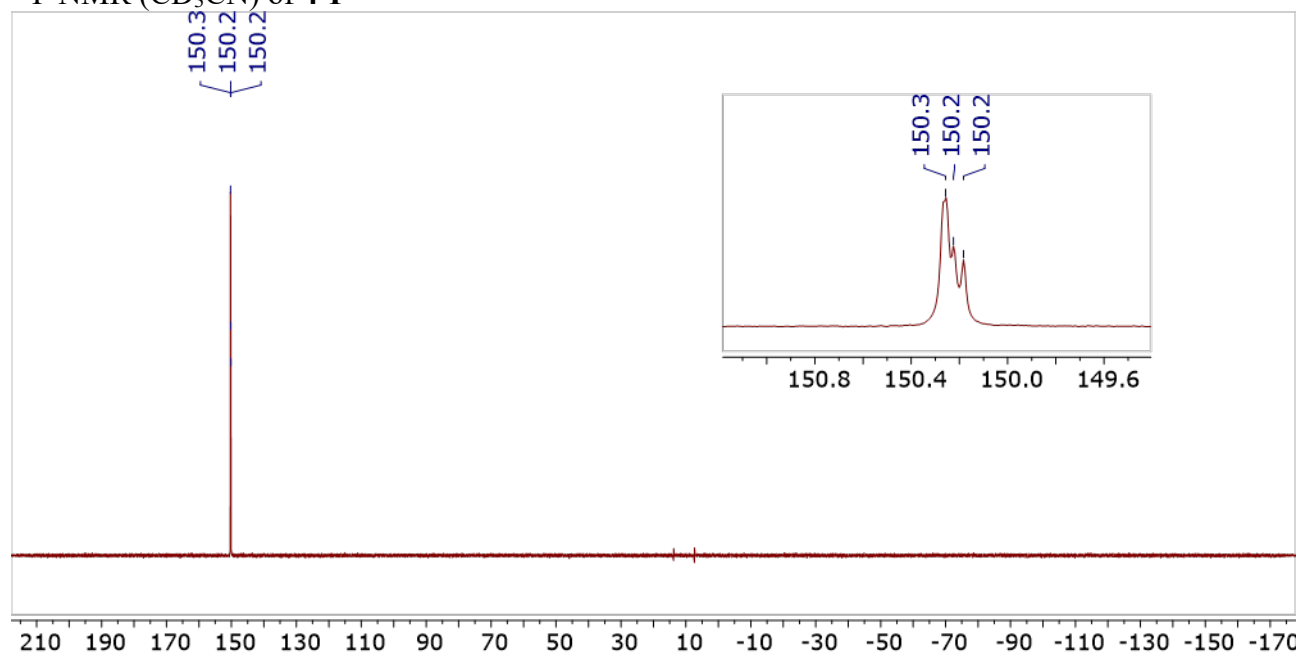

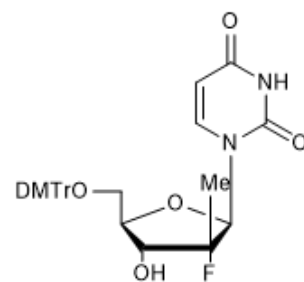

$^1\text{H}$  NMR ( $\text{CD}_3\text{CN}$ ) of **5**

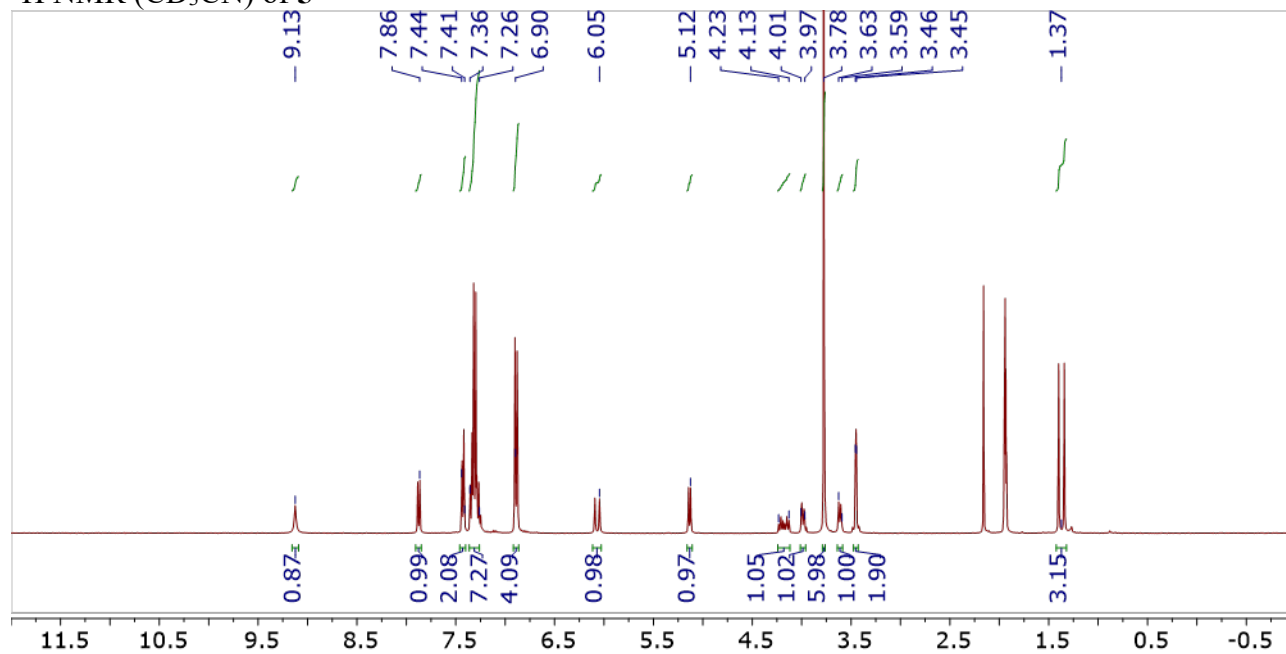

$^{13}\text{C}$  NMR ( $\text{CD}_3\text{CN}$ ) of **5**

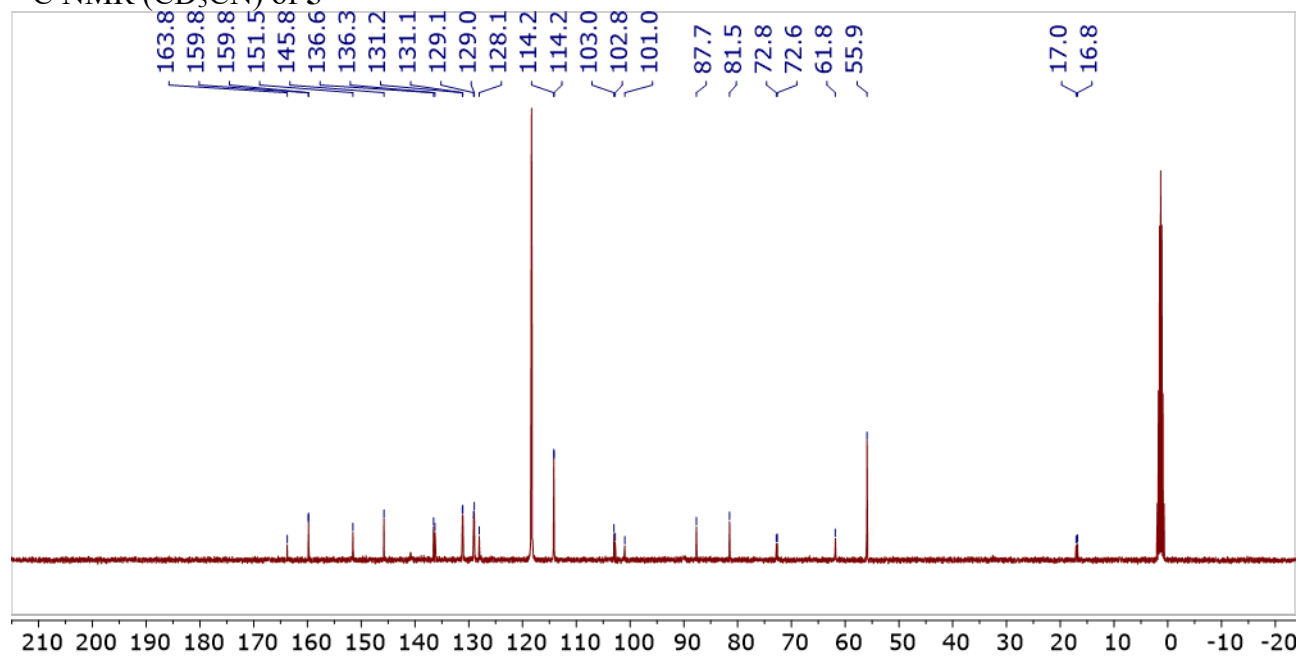

$^{19}\text{F}$  NMR ( $\text{CD}_3\text{CN}$ ) of **5**

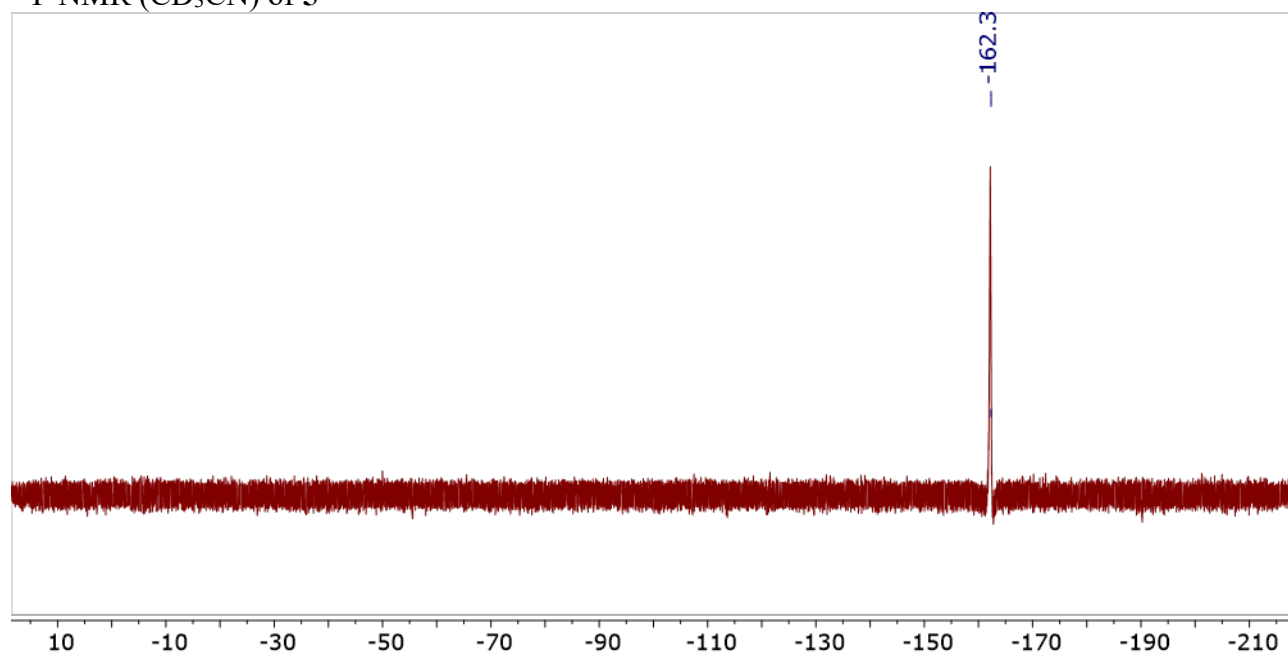

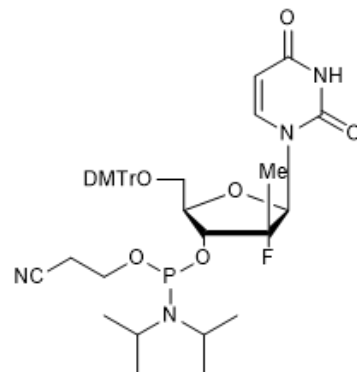

$^1\text{H}$  NMR ( $\text{CD}_3\text{CN}$ ) of **5-P**

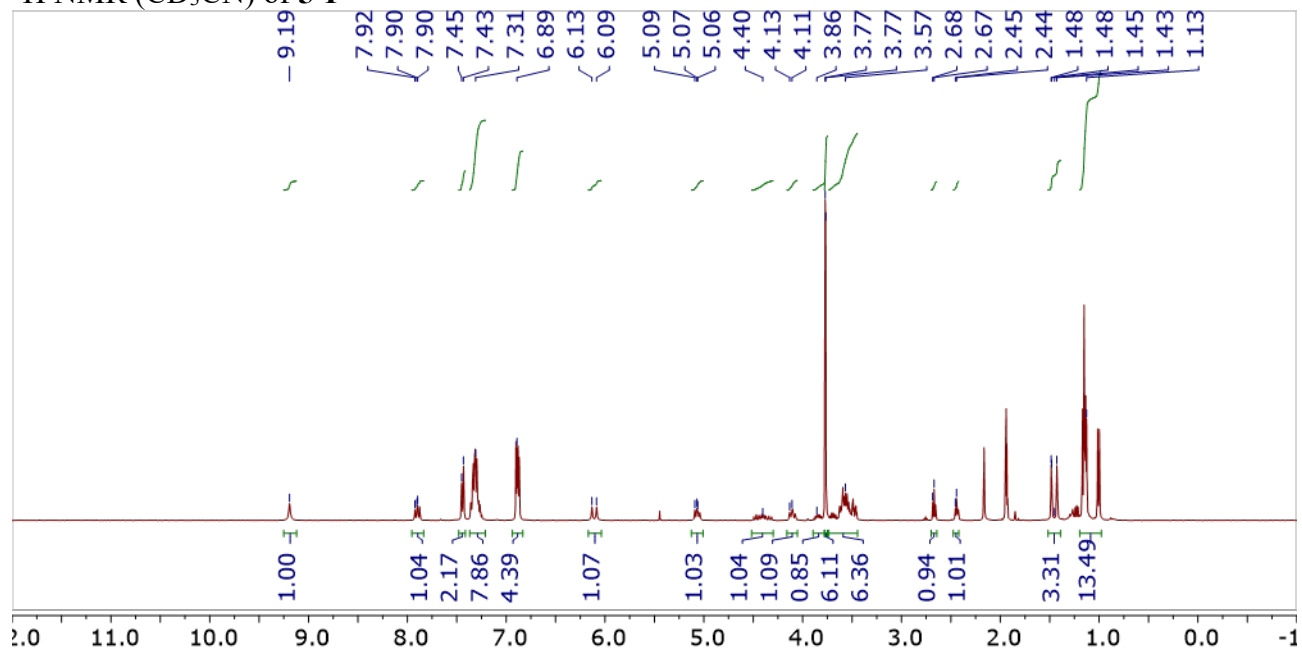

$^{13}\text{C}$  NMR ( $\text{CD}_3\text{CN}$ ) of **5-P**

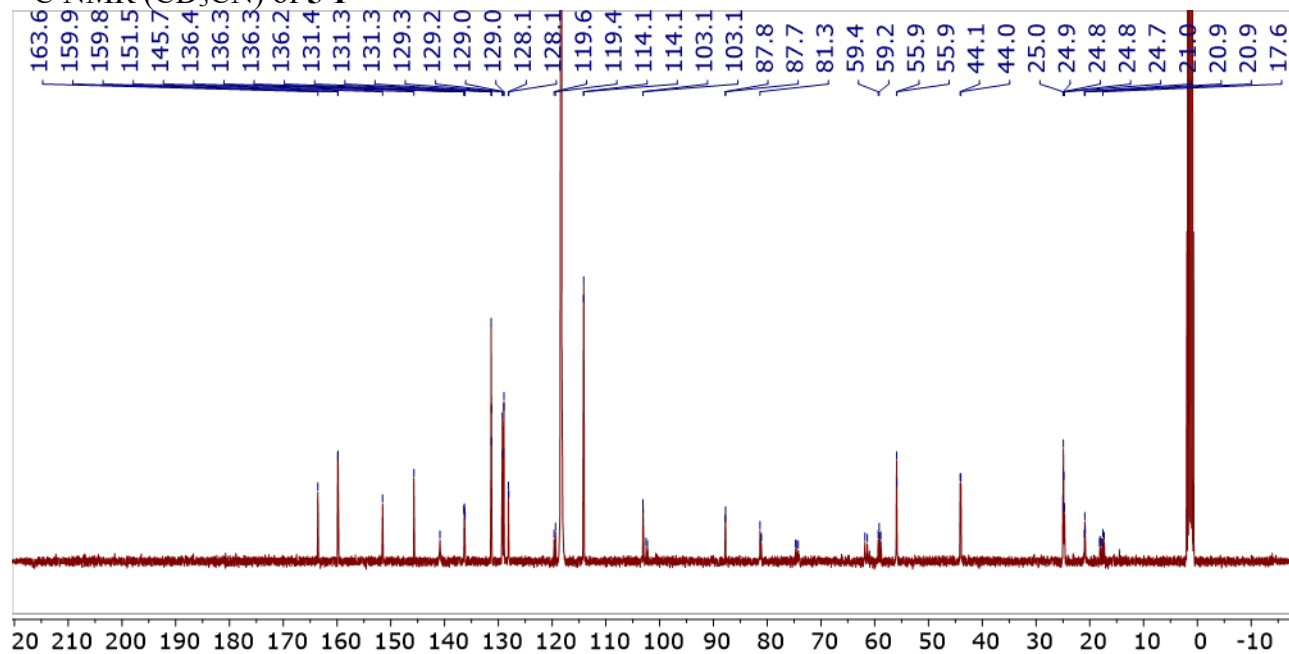

$^{19}\text{F}$  NMR ( $\text{CD}_3\text{CN}$ ) of **5-P**

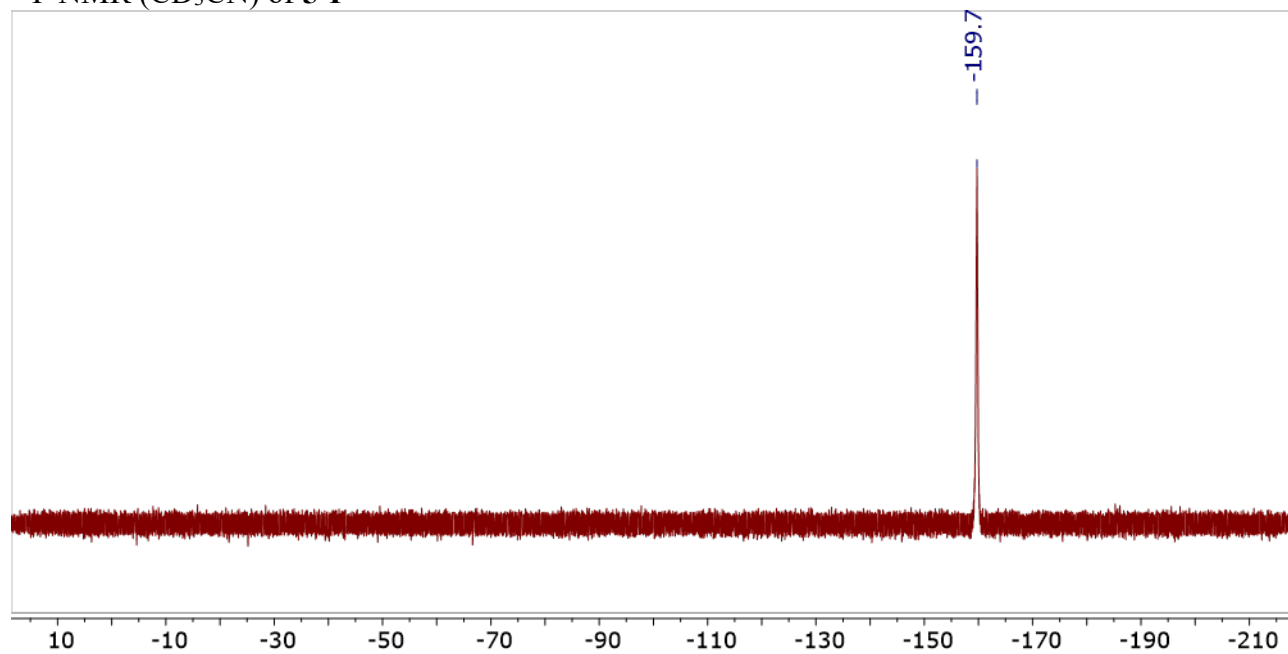

$^{31}\text{P}$  NMR ( $\text{CD}_3\text{CN}$ ) of **5-P**

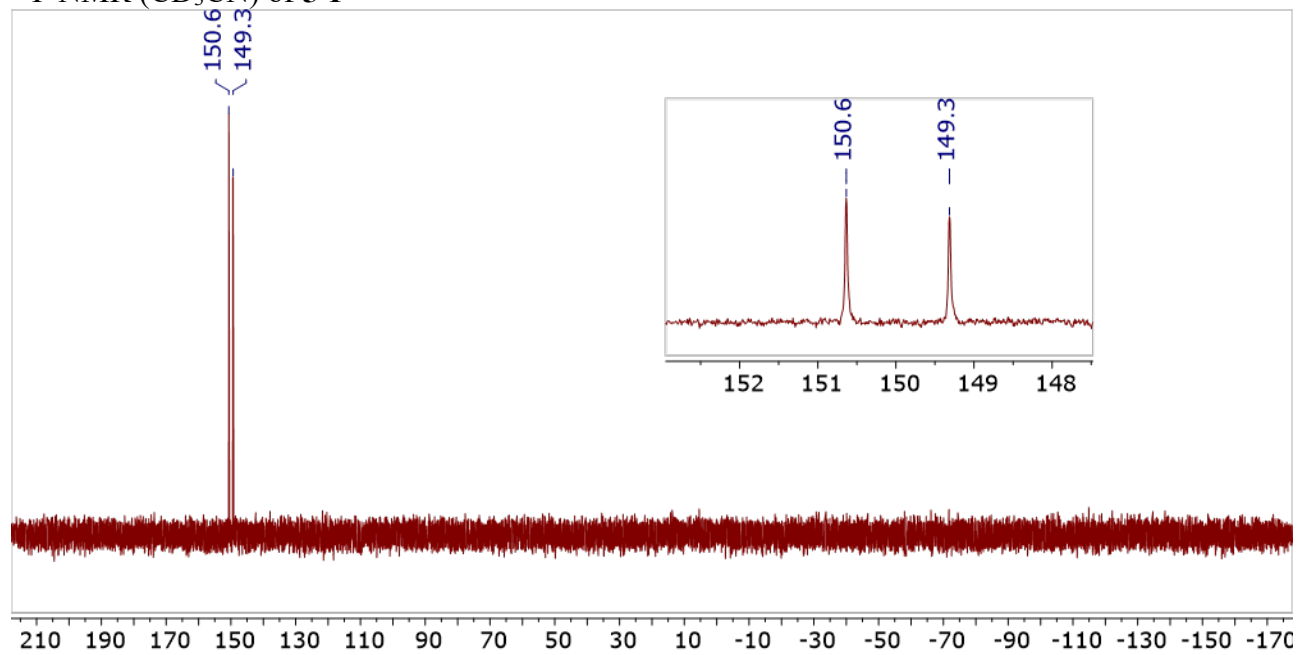

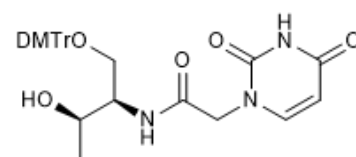

$^1\text{H}$  NMR ( $d_6$ -DMSO) of **6**

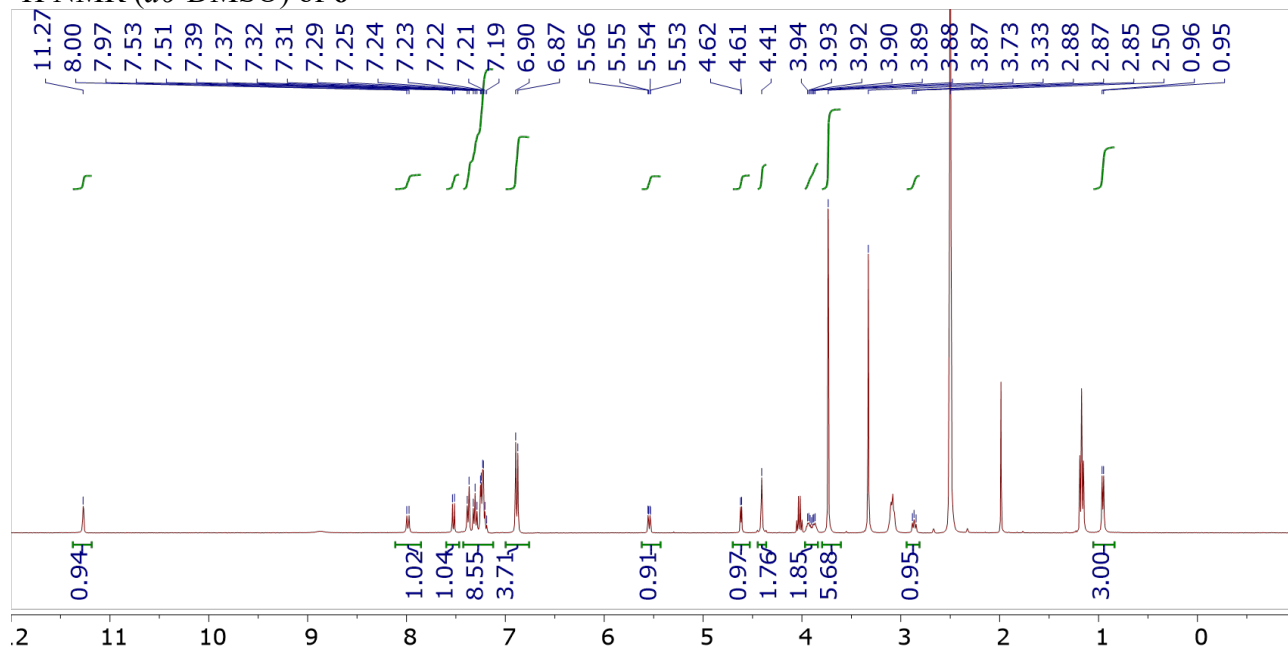

$^{13}\text{C}$  NMR ( $d_6$ -DMSO) of **6**

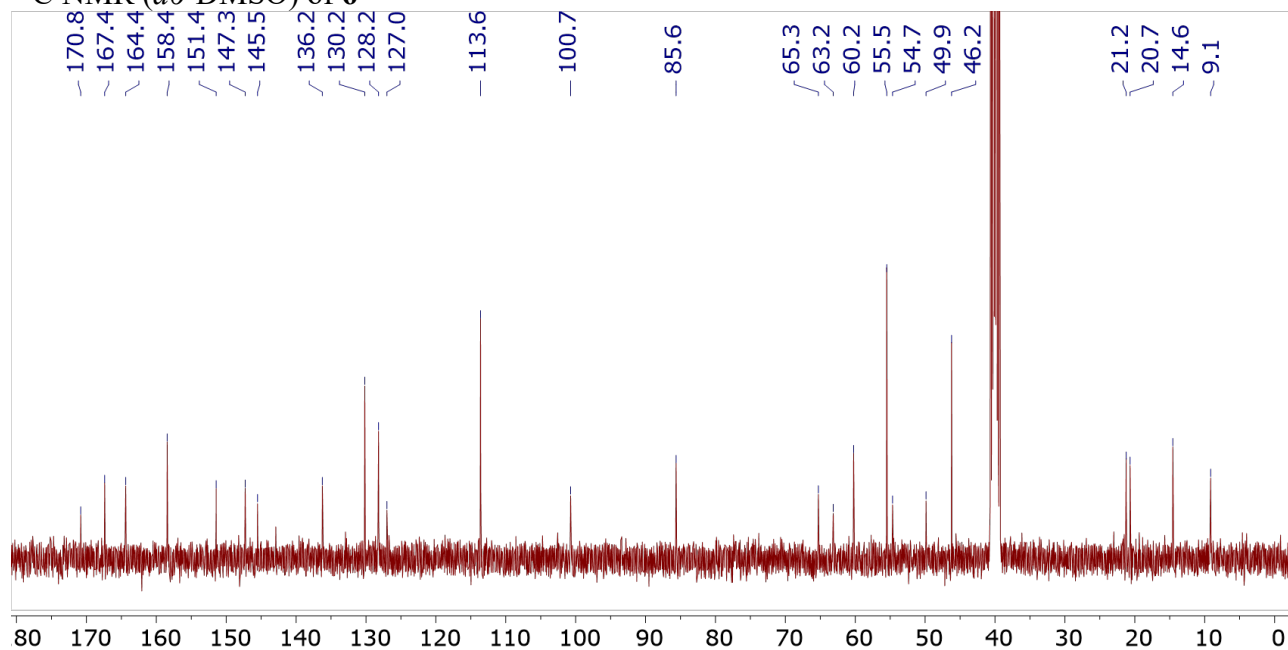

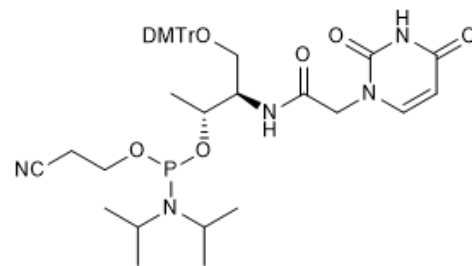

$^1\text{H NMR}$  ( $\text{CD}_3\text{CN}$ ) of **6-P**

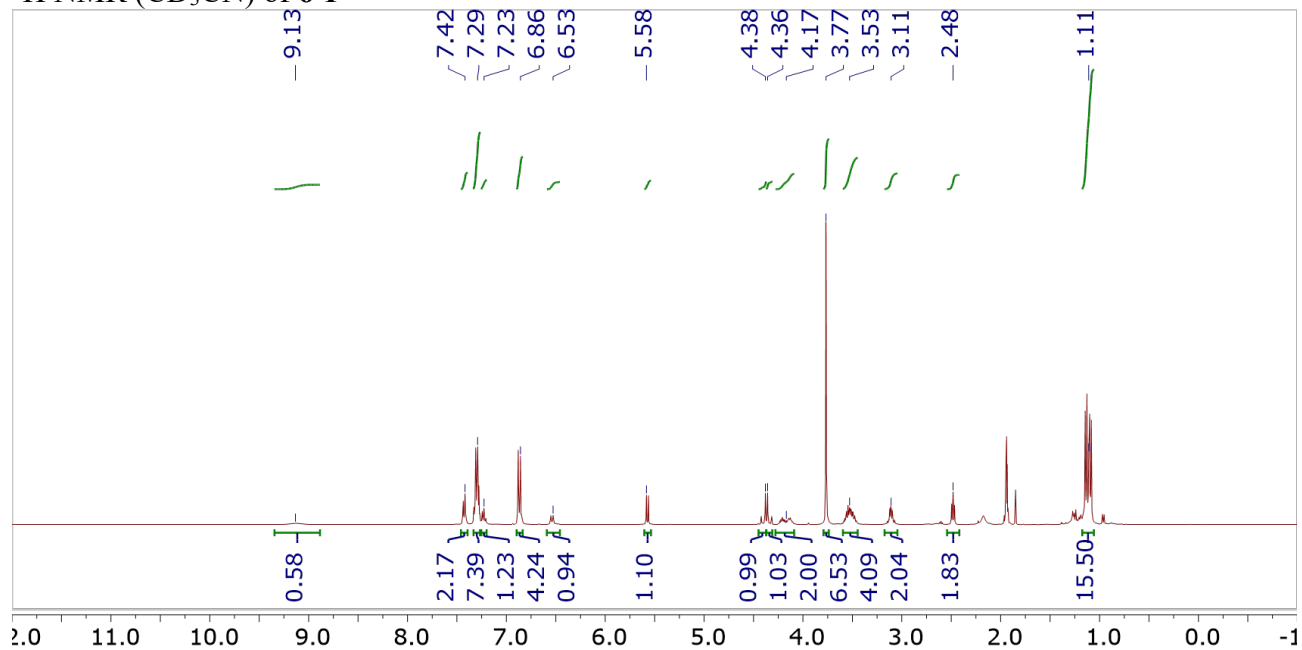

$^{13}\text{C NMR}$  ( $\text{CD}_3\text{CN}$ ) of **6-P**

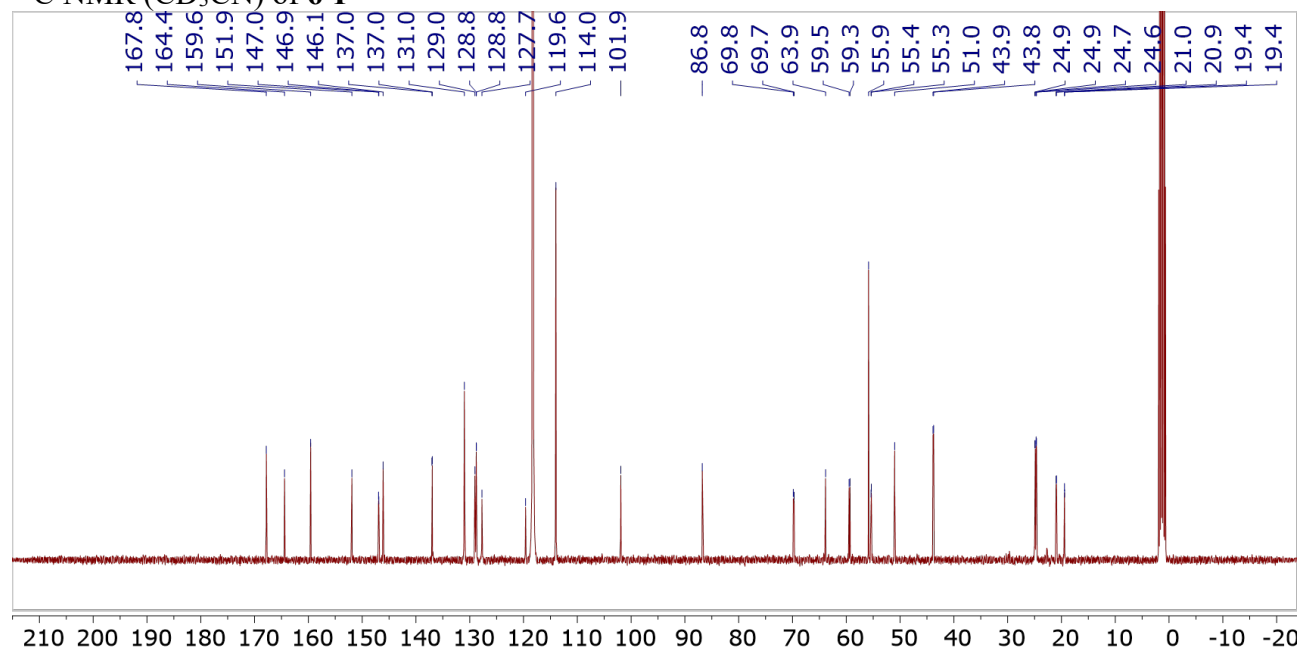

$^{31}\text{P}$  NMR ( $\text{CD}_3\text{CN}$ ) of **6-P**

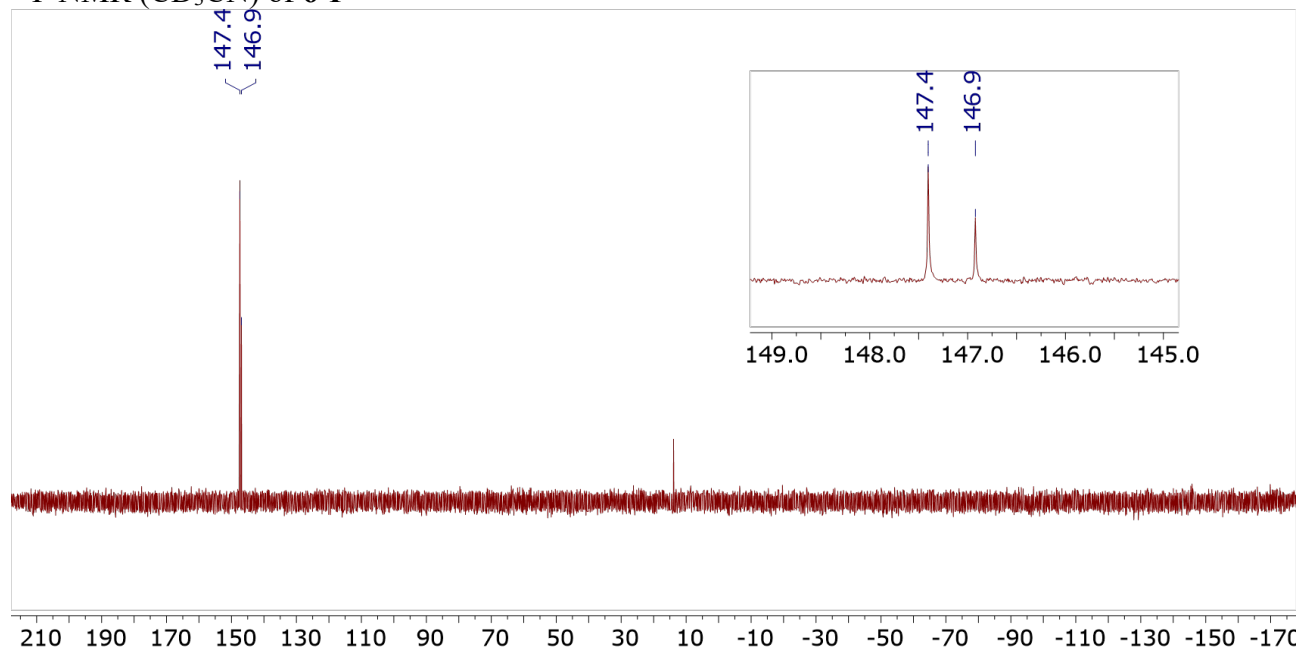



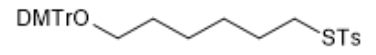

$^1\text{H}$  NMR ( $\text{CDCl}_3$ ) of **8.1**

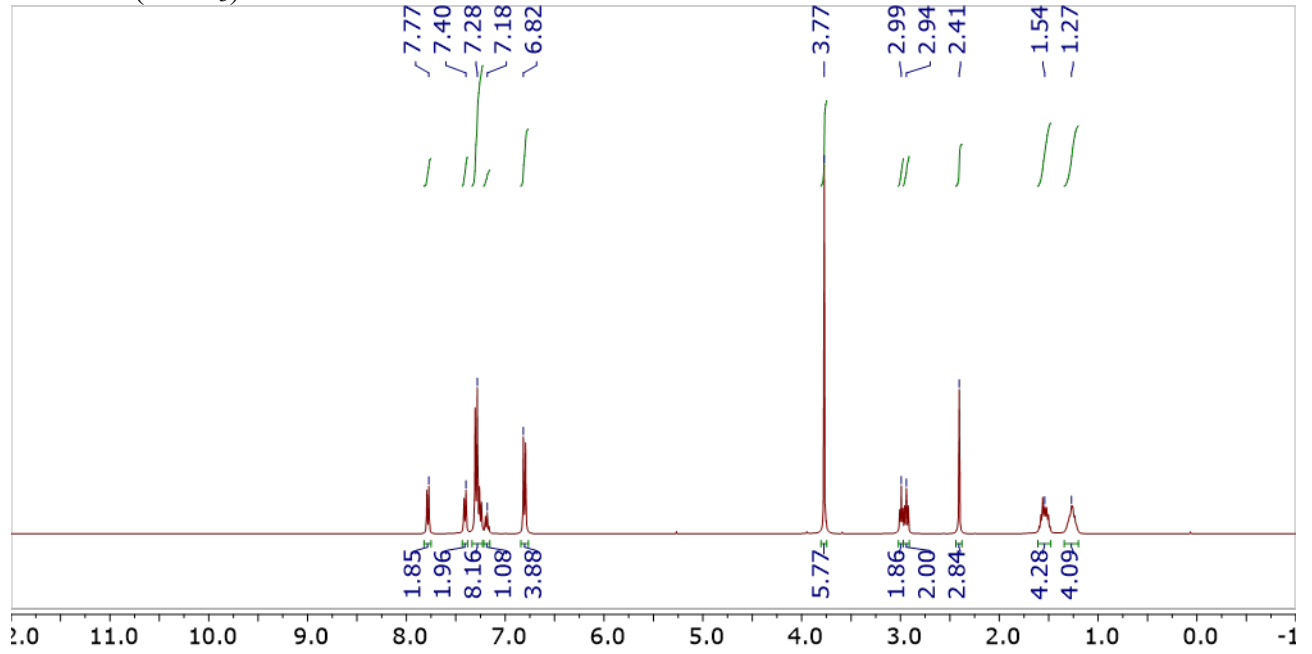

$^{13}\text{C}$  NMR ( $\text{CDCl}_3$ ) of **8.1**

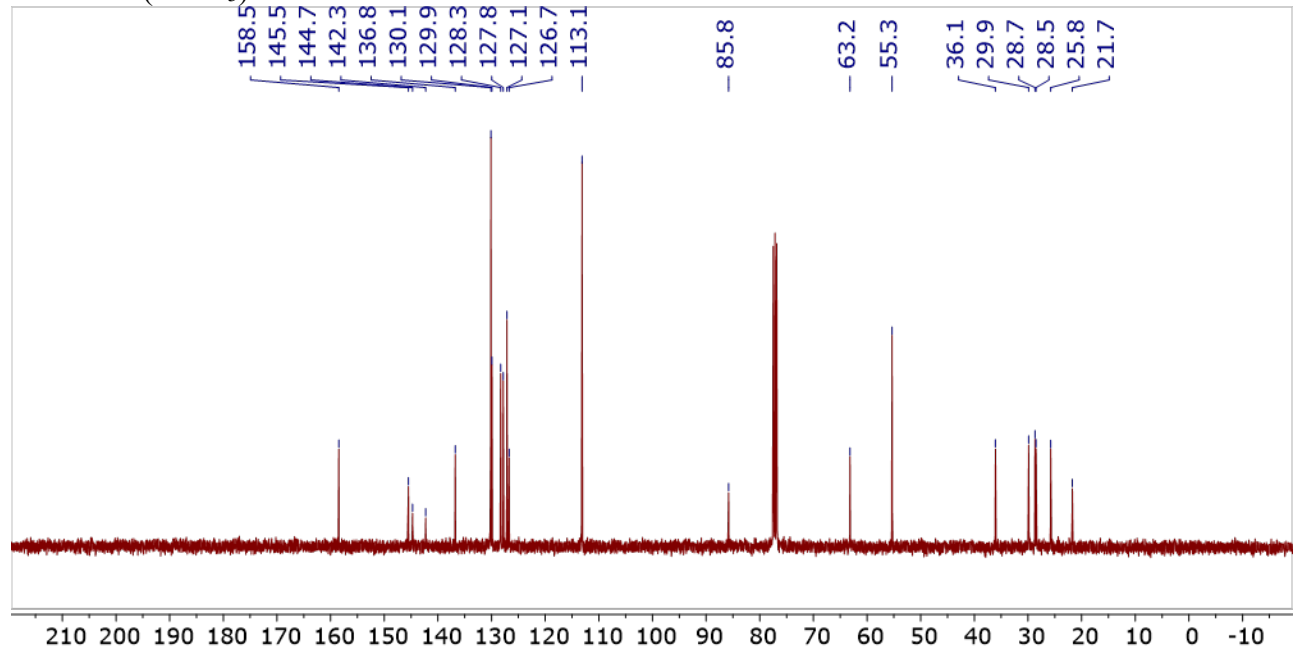

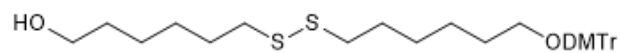

<sup>1</sup>H NMR (CDCl<sub>3</sub>) of **8**

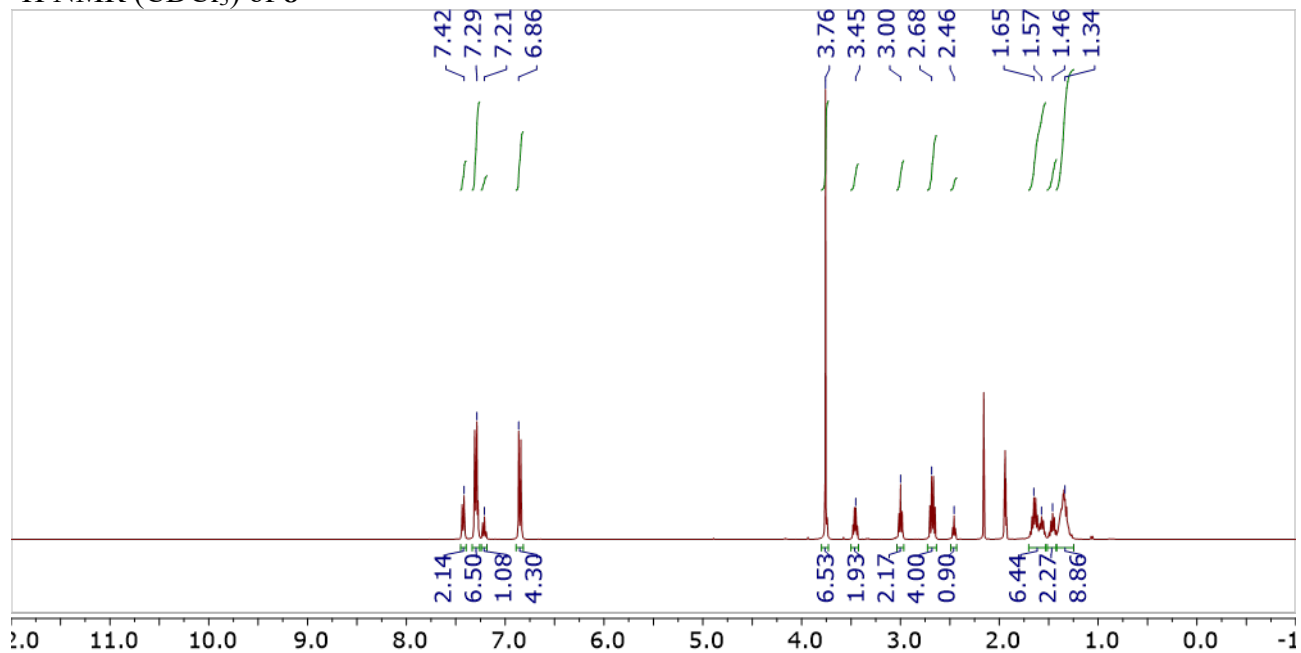

<sup>13</sup>C NMR (CDCl<sub>3</sub>) of **8**

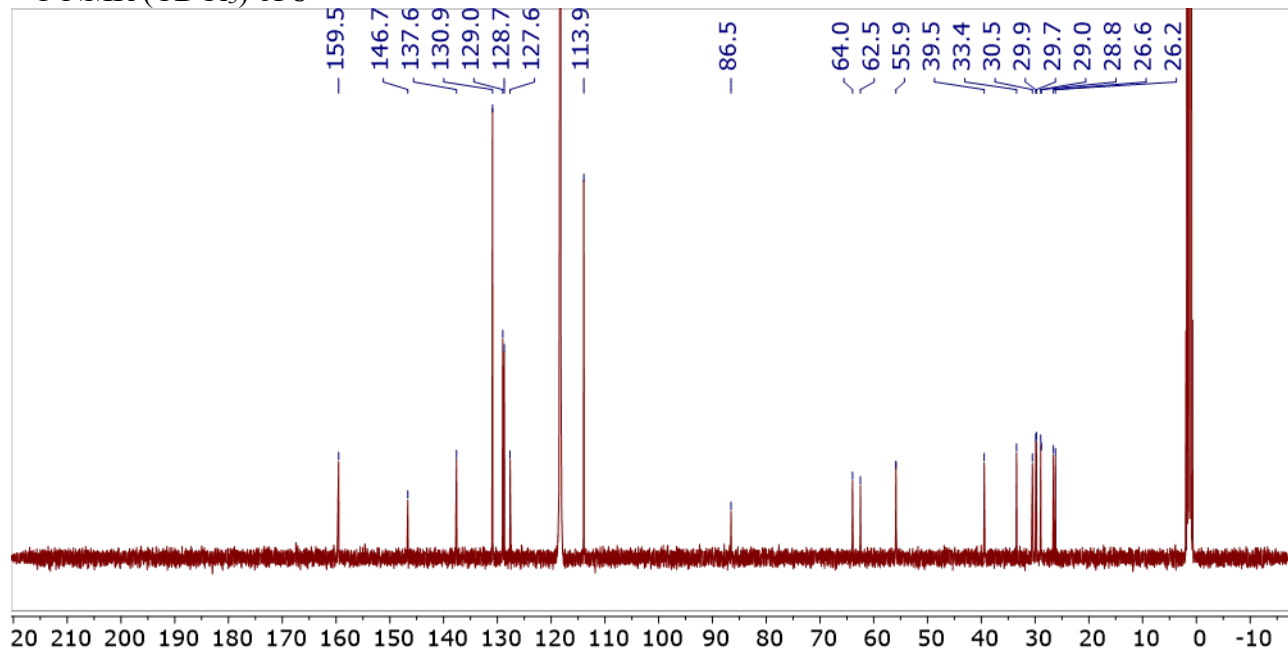

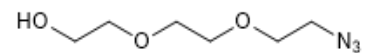

$^1\text{H}$  NMR ( $\text{CD}_3\text{CN}$ ) of **9**

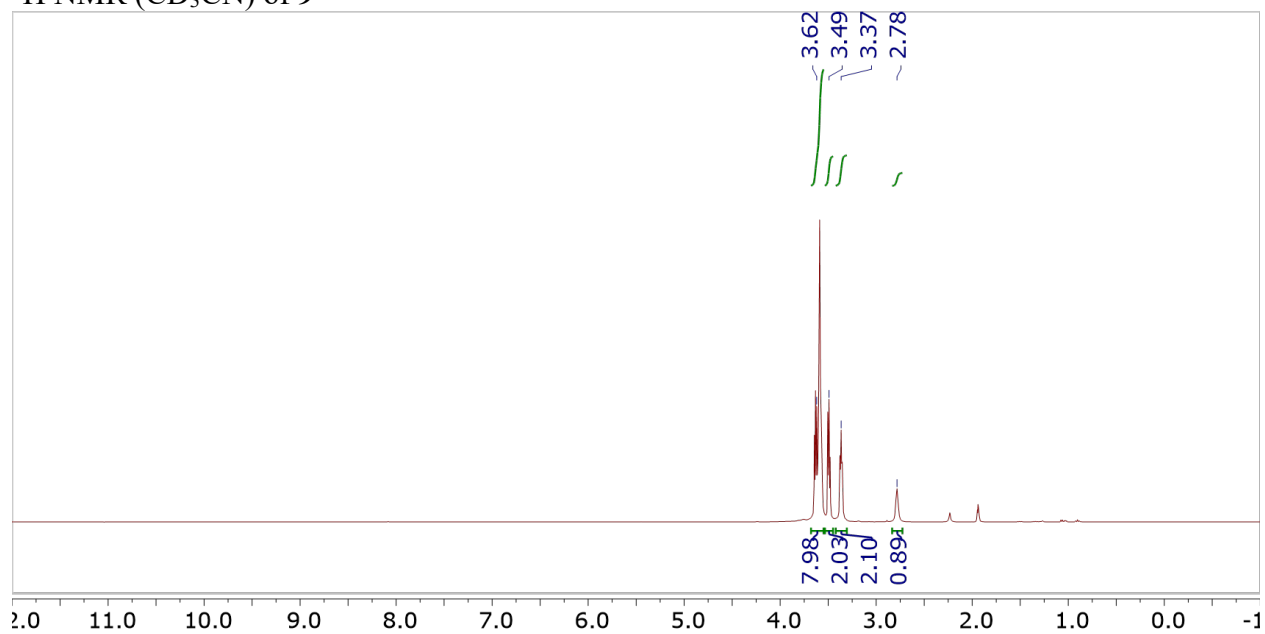

$^{13}\text{C}$  NMR ( $\text{CD}_3\text{CN}$ ) of **9**

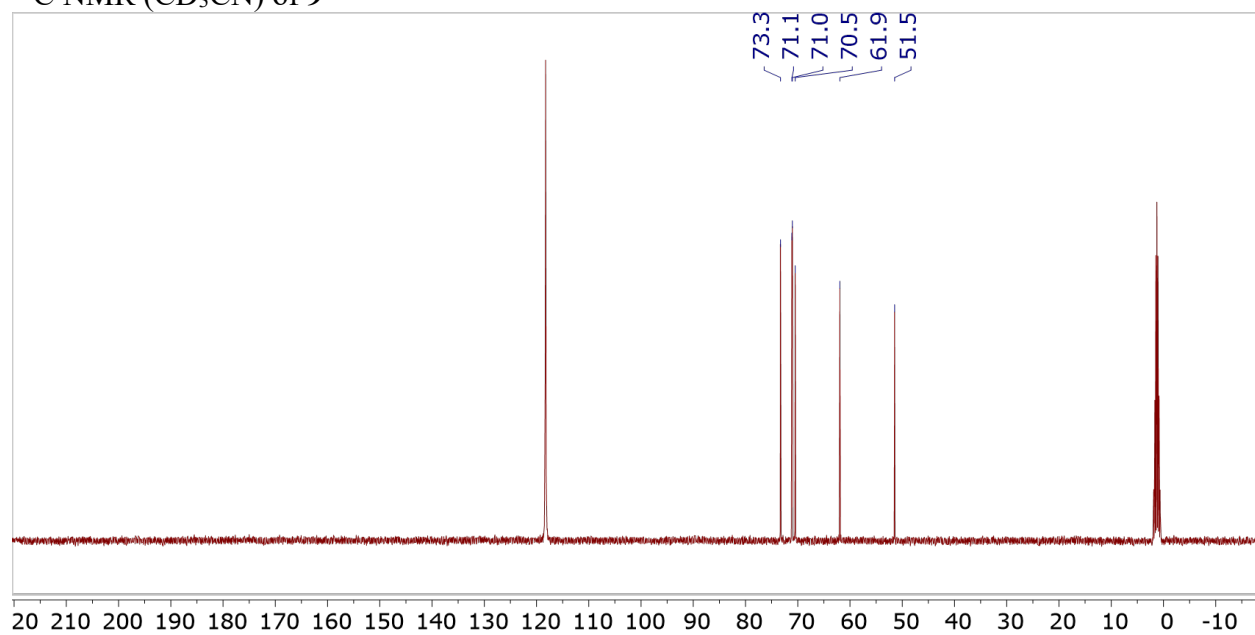

# NMR Spectra of 9AJ and 2-cyanoethyl *N,N*-diisopropylphosphonamidate

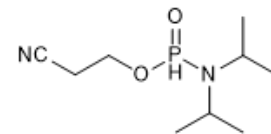

$^1\text{H}$  NMR ( $\text{CD}_3\text{CN}$ ) of 2-cyanoethyl *N,N*-diisopropylphosphonamidate

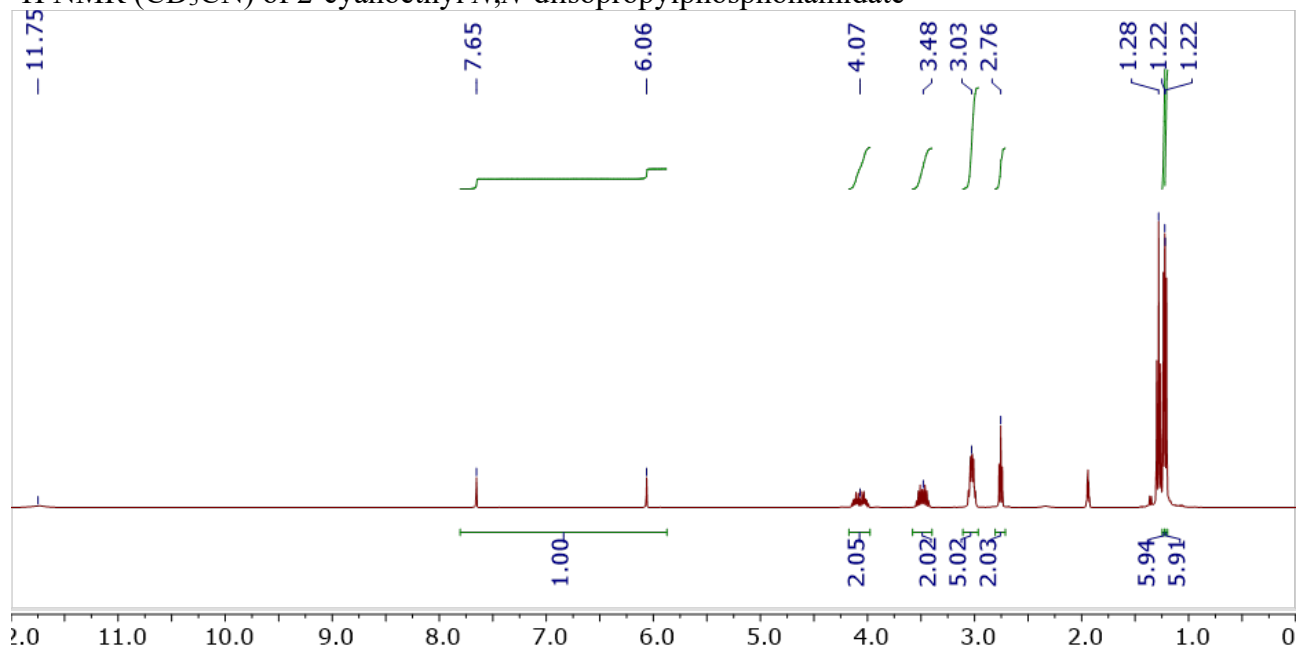

$^{31}\text{P}$  NMR ( $\text{CD}_3\text{CN}$ ) of 2-cyanoethyl *N,N*-diisopropylphosphonamidate

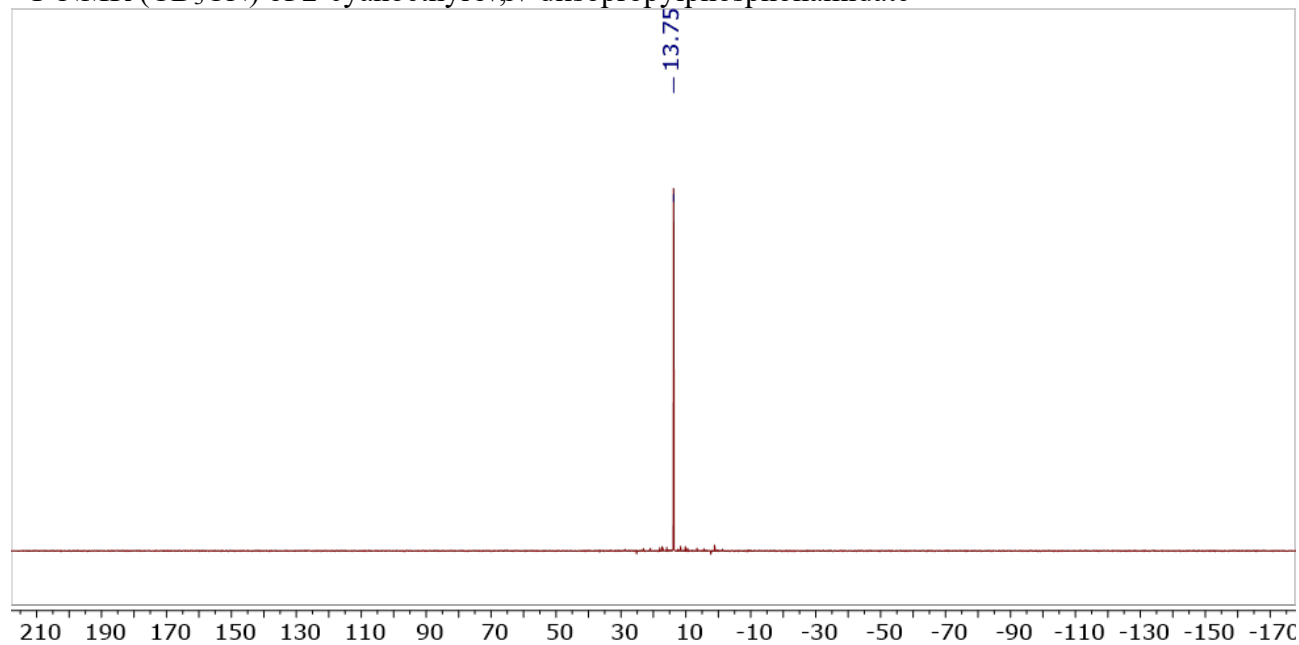

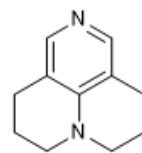

$^1\text{H}$  NMR ( $\text{CD}_3\text{CN}$ ) of 9AJ

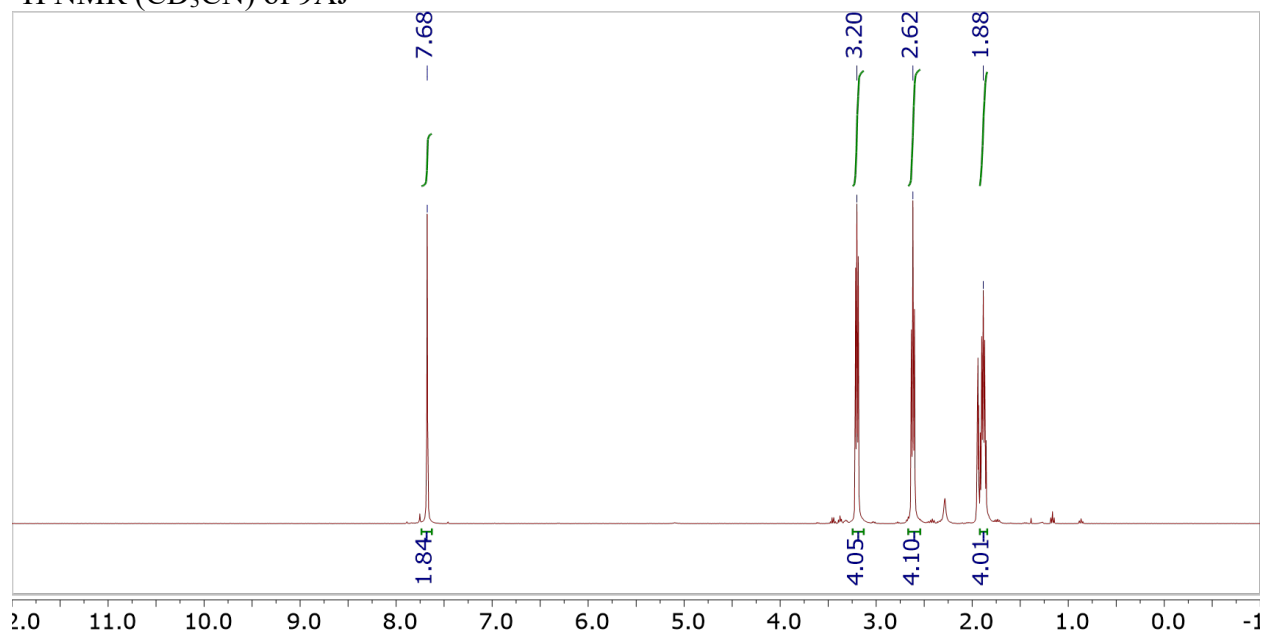

# NMR Spectra (Full) of Flowthrough (Stacked with References)

Benzoyl 2'-deoxyadenosine  $^1\text{H}$  NMR ( $\text{CD}_3\text{CN}$ )

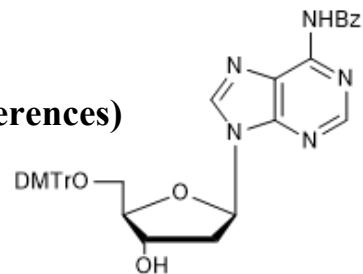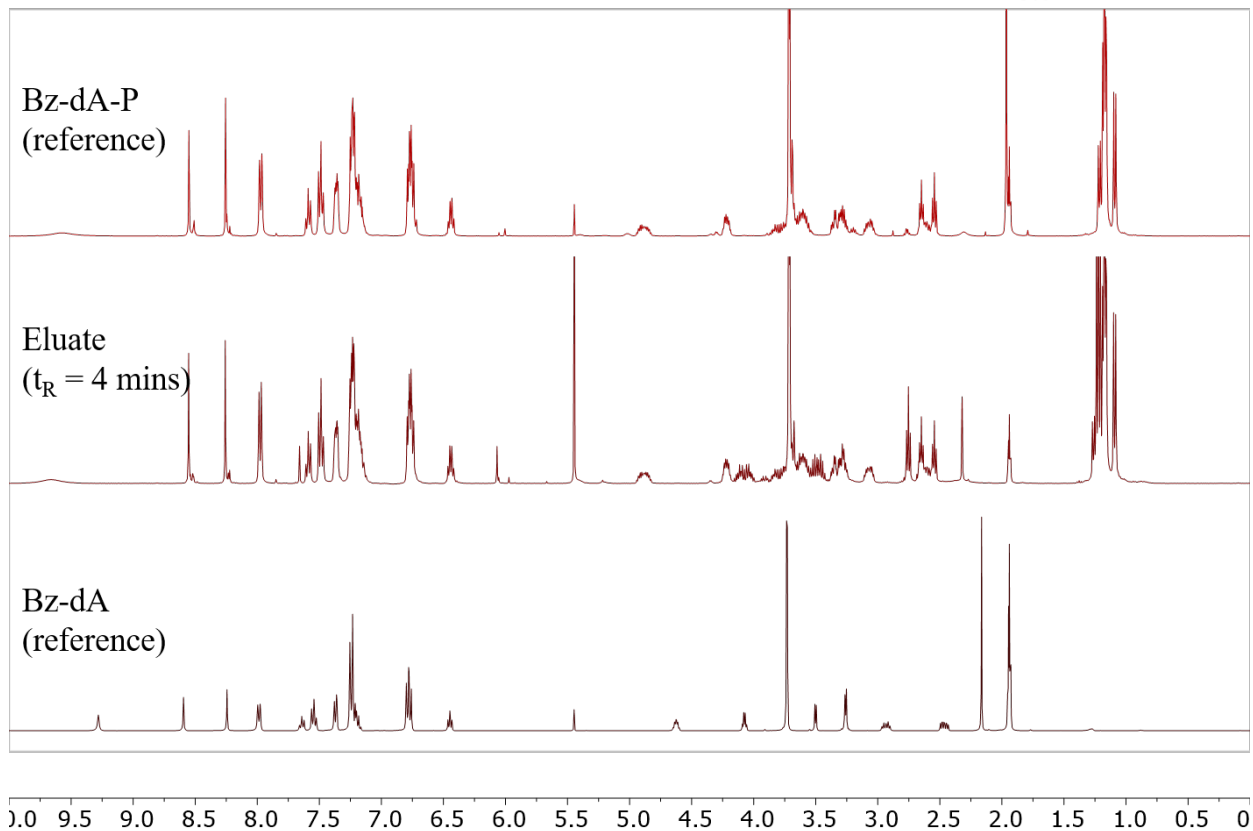

Benzoyl 2'-deoxyadenosine  $^{31}\text{P}$  NMR ( $\text{CD}_3\text{CN}$ ), eluate

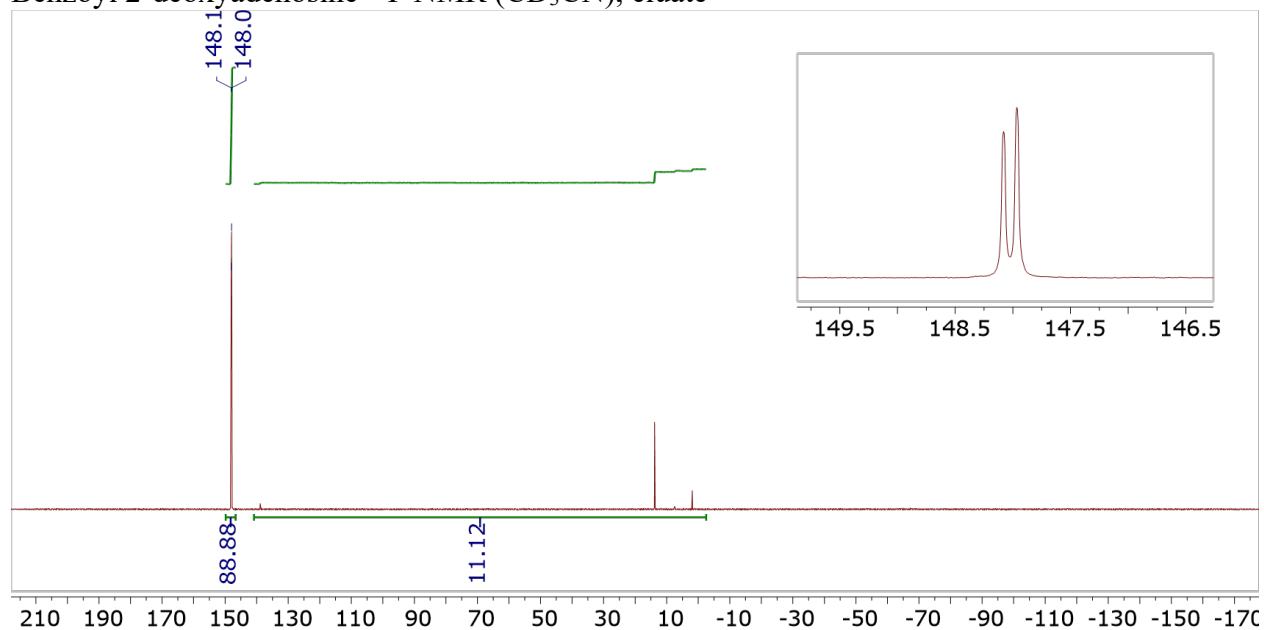

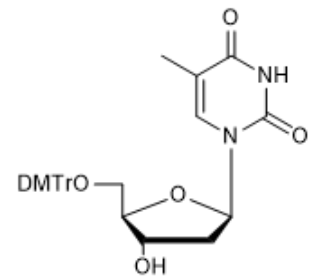

Thymidine  $^1\text{H}$  NMR ( $\text{CD}_3\text{CN}$ )

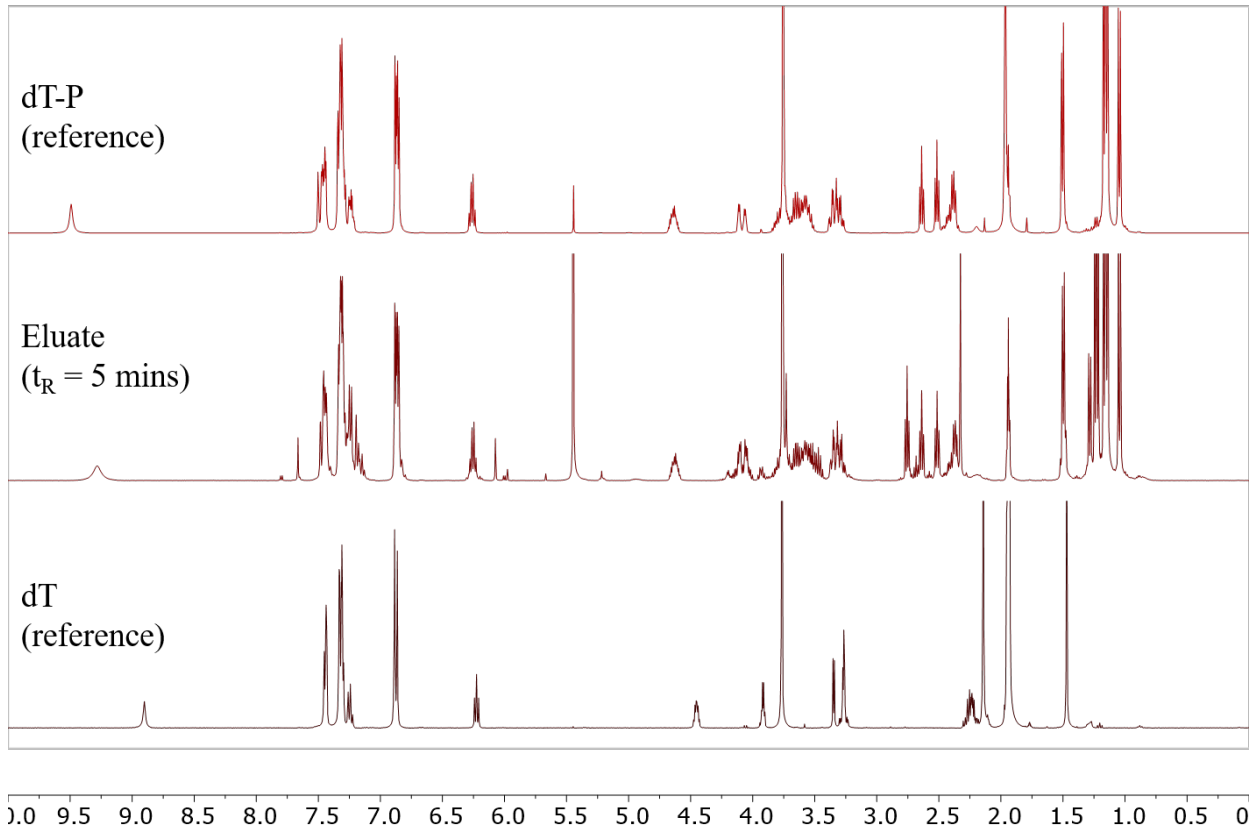

Thymidine  $^{31}\text{P}$  NMR ( $\text{CD}_3\text{CN}$ ), eluate

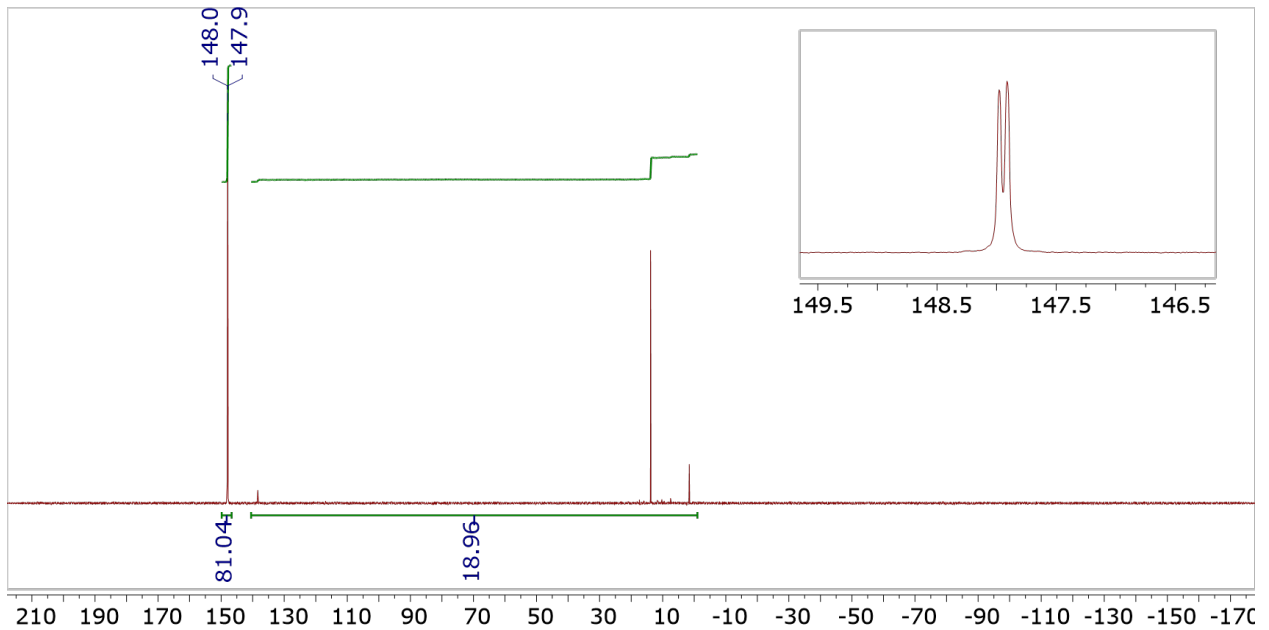

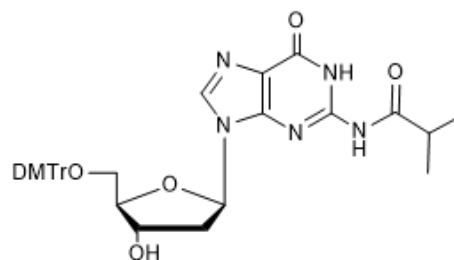

Isobutyryl 2' deoxyguanosine  $^1\text{H}$  NMR ( $\text{CD}_3\text{CN}$ )

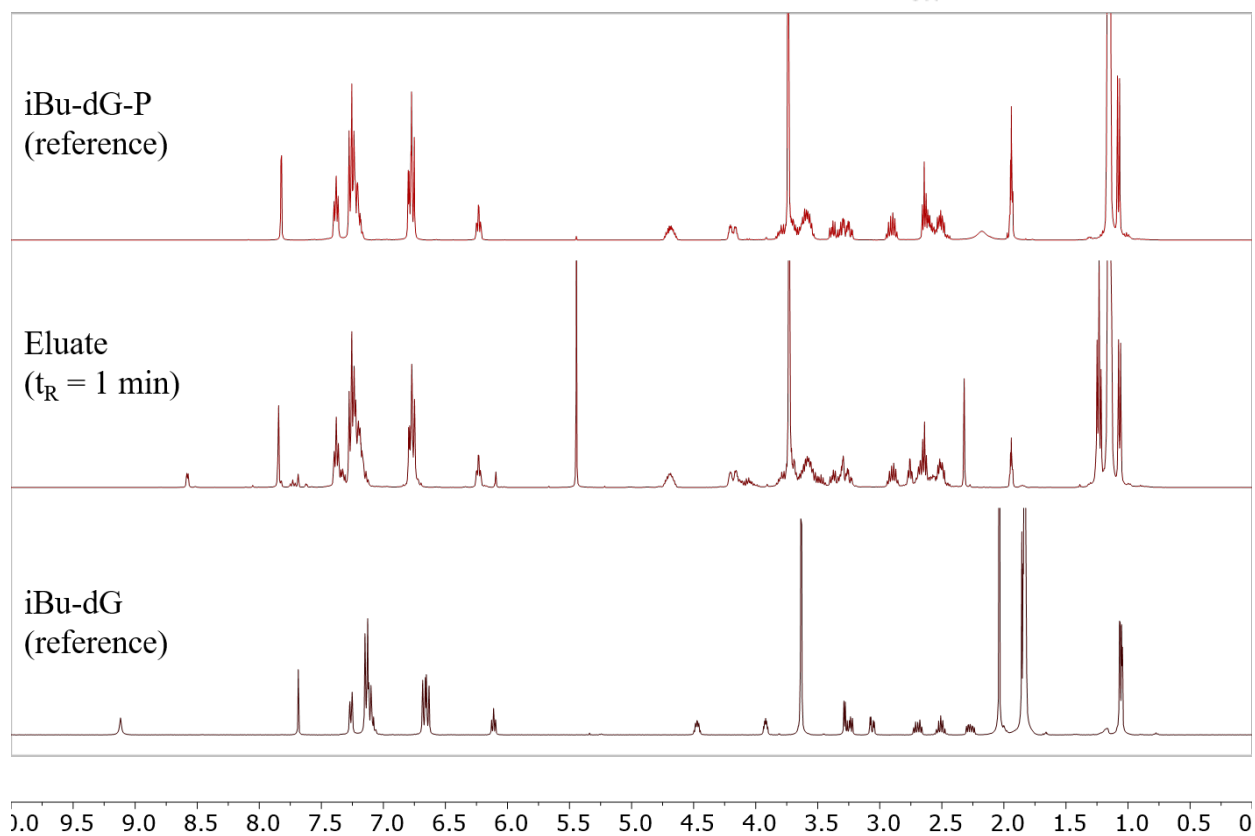

Isobutyryl 2' deoxyguanosine  $^{31}\text{P}$  NMR ( $\text{CD}_3\text{CN}$ ), eluate

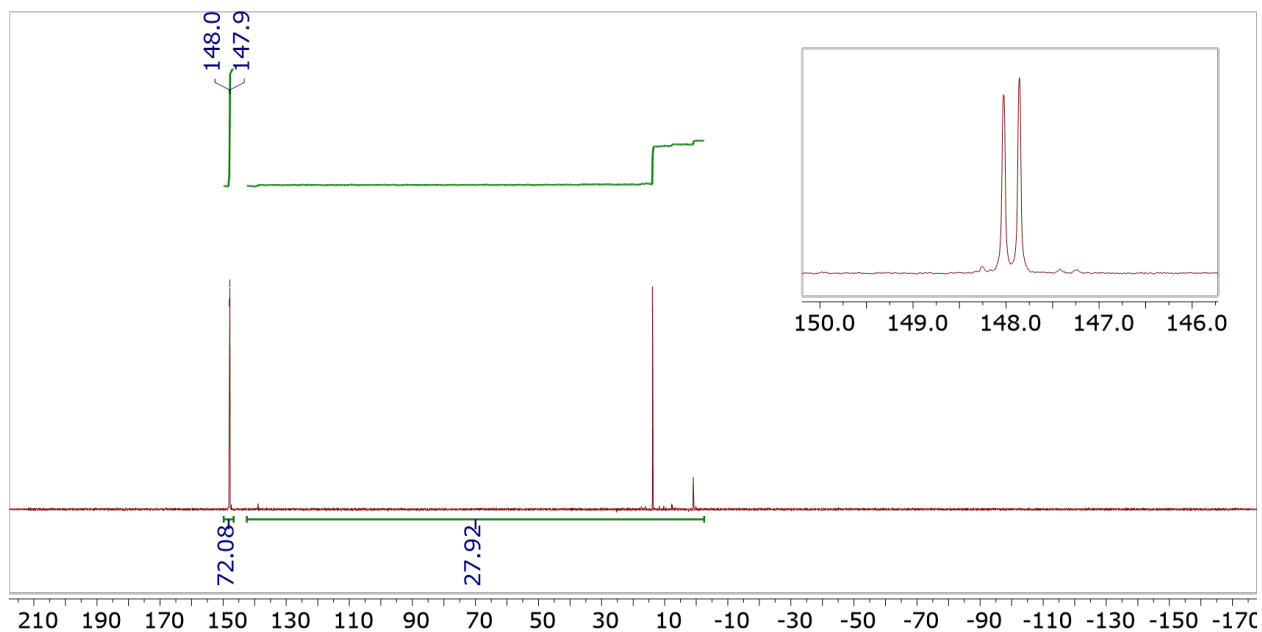



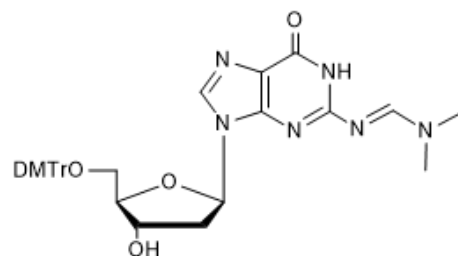

dmf 2' deoxyguanosine  $^1\text{H}$  NMR ( $\text{CD}_3\text{CN}$ )

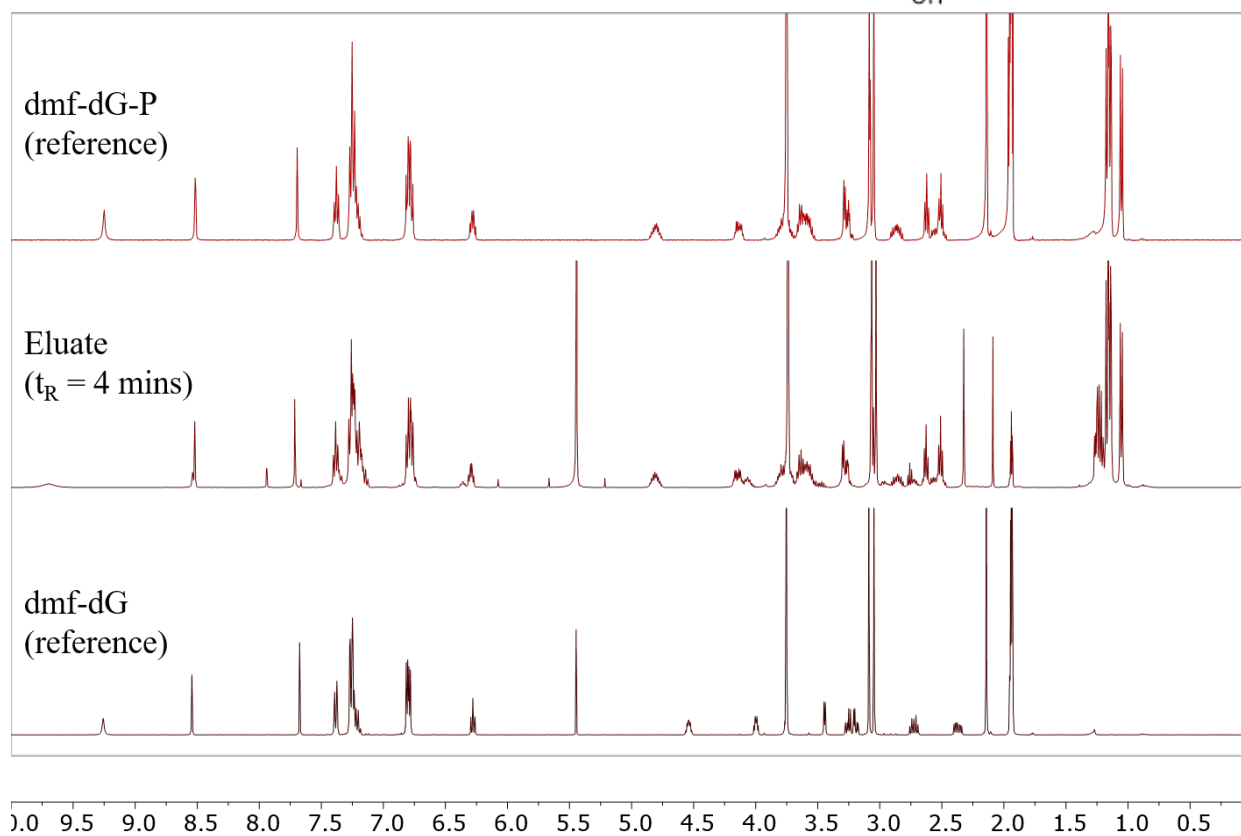

dmf 2' deoxyguanosine  $^{31}\text{P}$  NMR ( $\text{CD}_3\text{CN}$ )

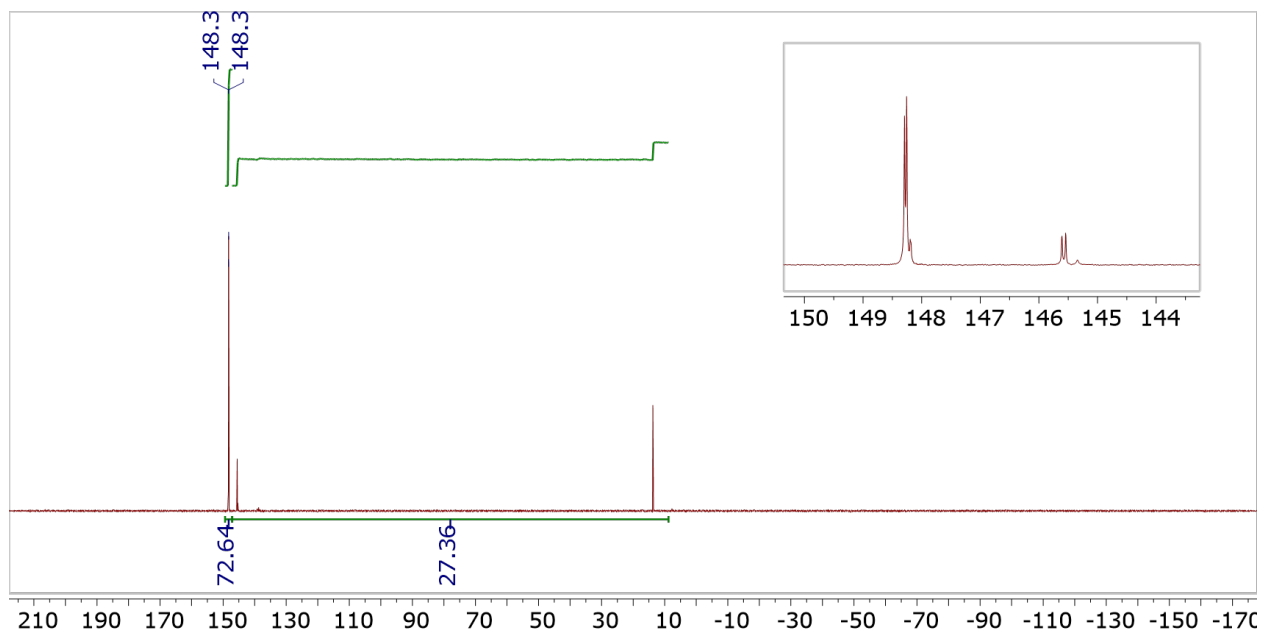

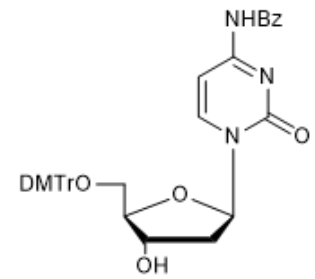

Benzoyl 2'deoxyctidine  $^1\text{H}$  NMR ( $\text{CD}_3\text{CN}$ )

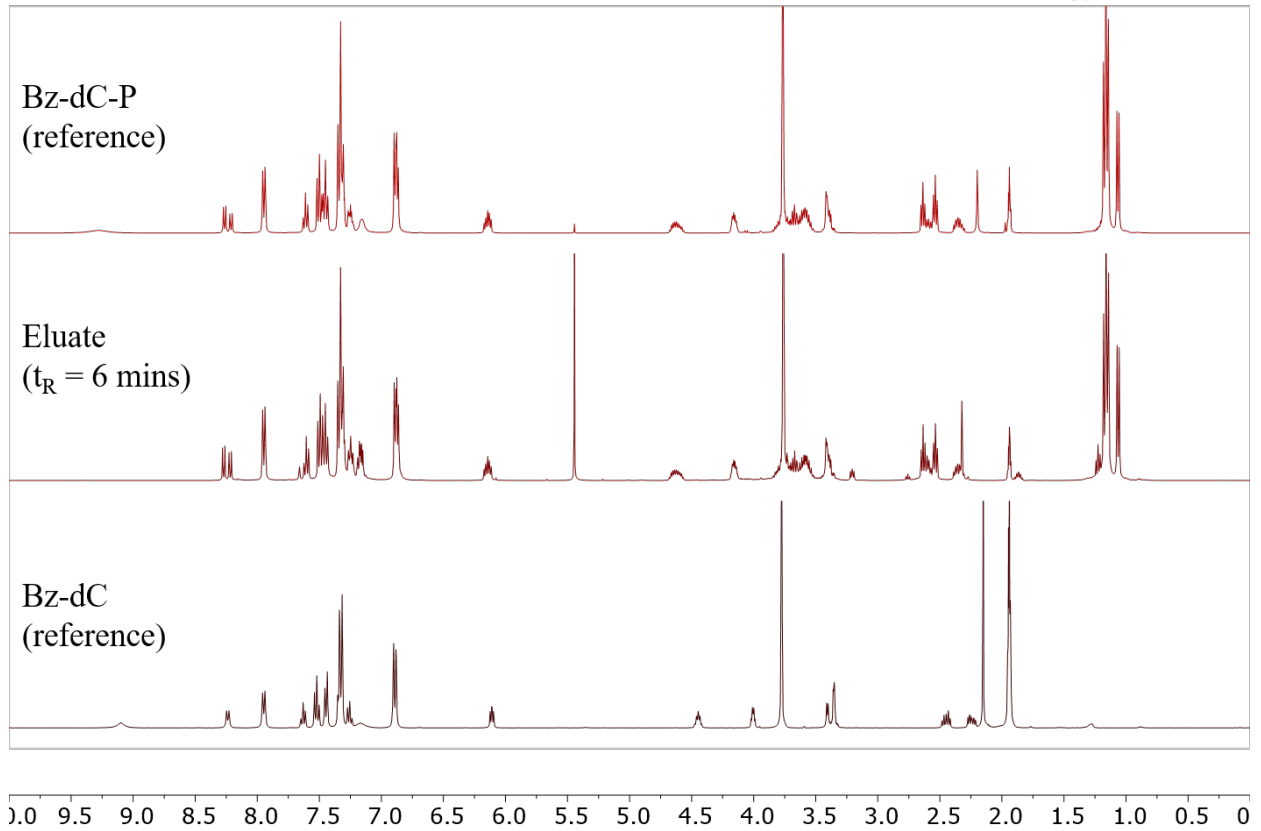

Benzoyl 2'deoxyctidine  $^{31}\text{P}$  NMR ( $\text{CD}_3\text{CN}$ ), eluate

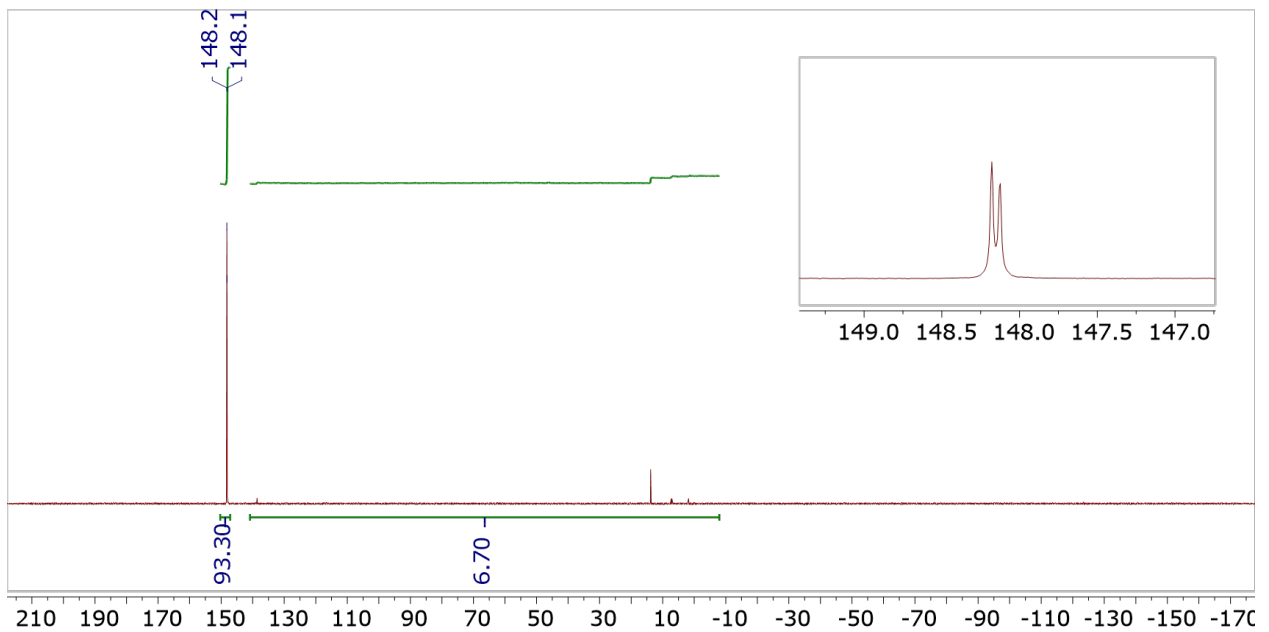

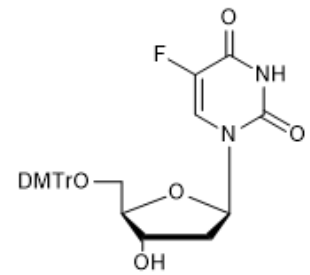

Compound **1**,  $^1\text{H}$  NMR ( $\text{CD}_3\text{CN}$ )

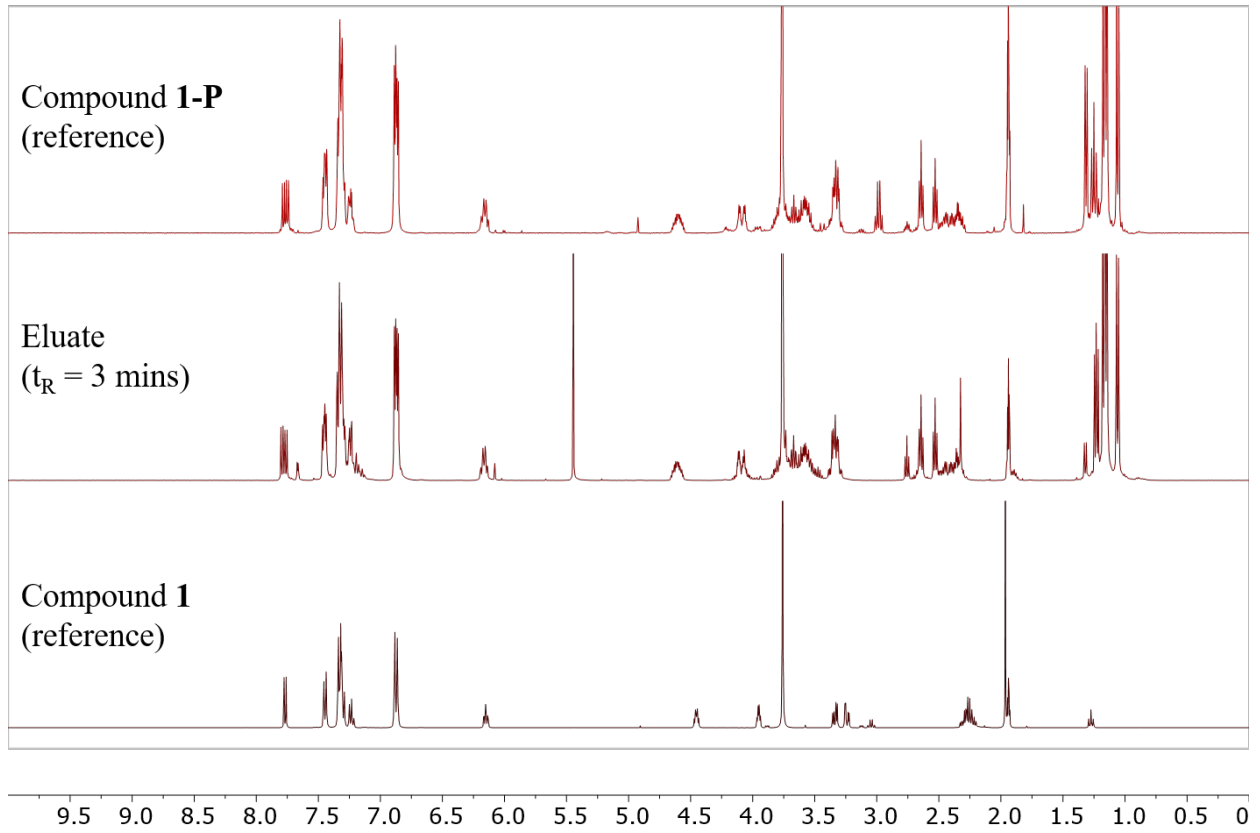

Compound **1**,  $^{31}\text{P}$  NMR ( $\text{CD}_3\text{CN}$ ), eluate

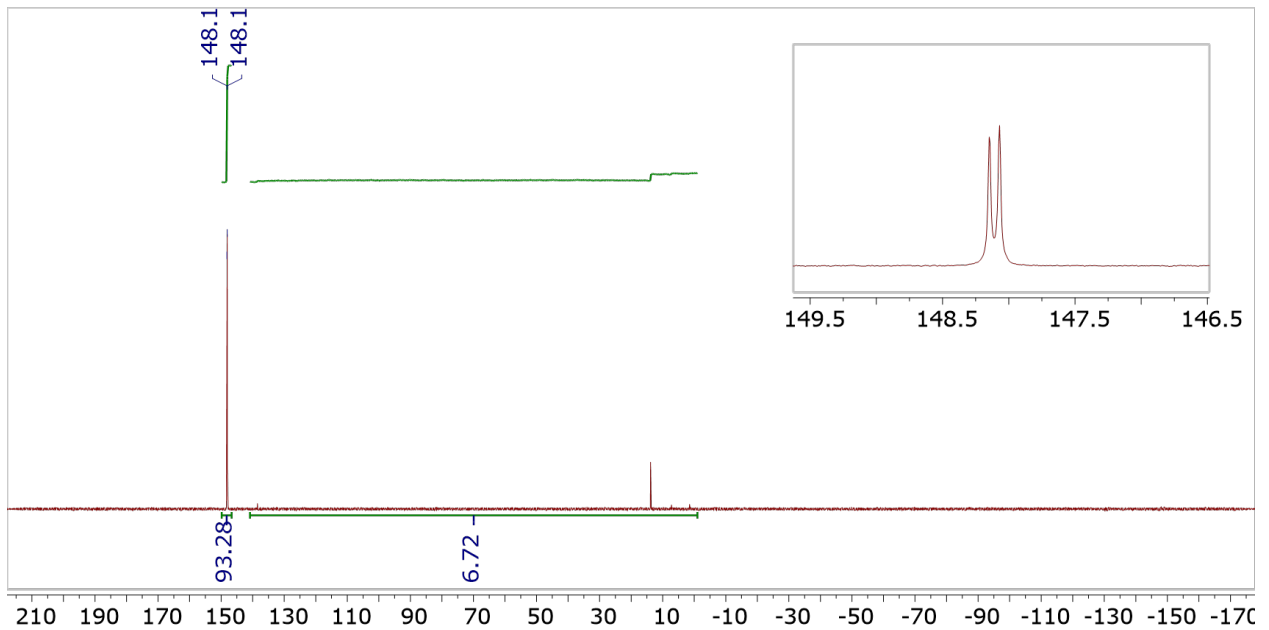

Compound **2**,  $^1\text{H}$  NMR ( $\text{CD}_3\text{CN}$ )

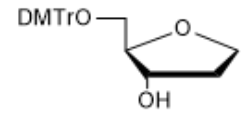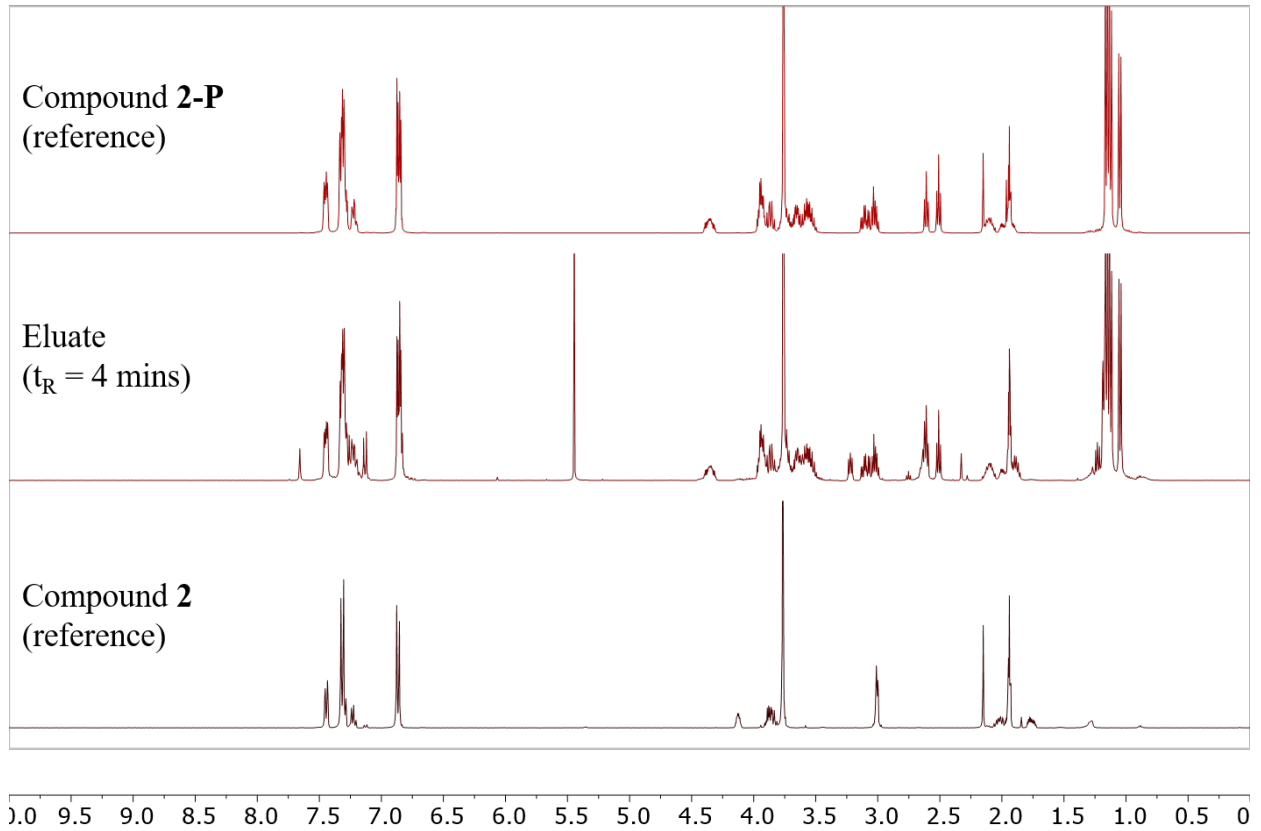

Compound **2**,  $^{31}\text{P}$  NMR ( $\text{CD}_3\text{CN}$ ), eluate

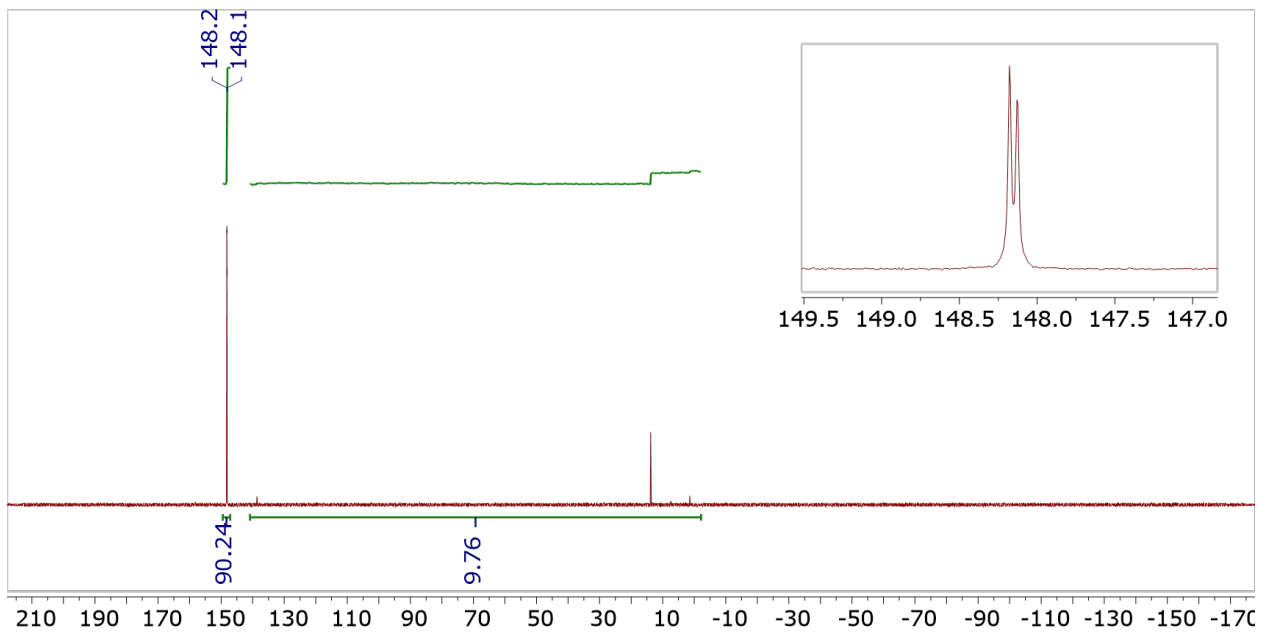

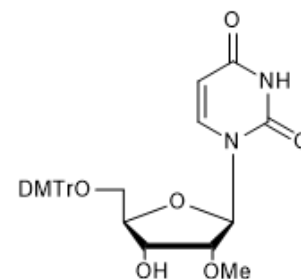

Compound **3**,  $^1\text{H}$  NMR ( $\text{CD}_3\text{CN}$ )

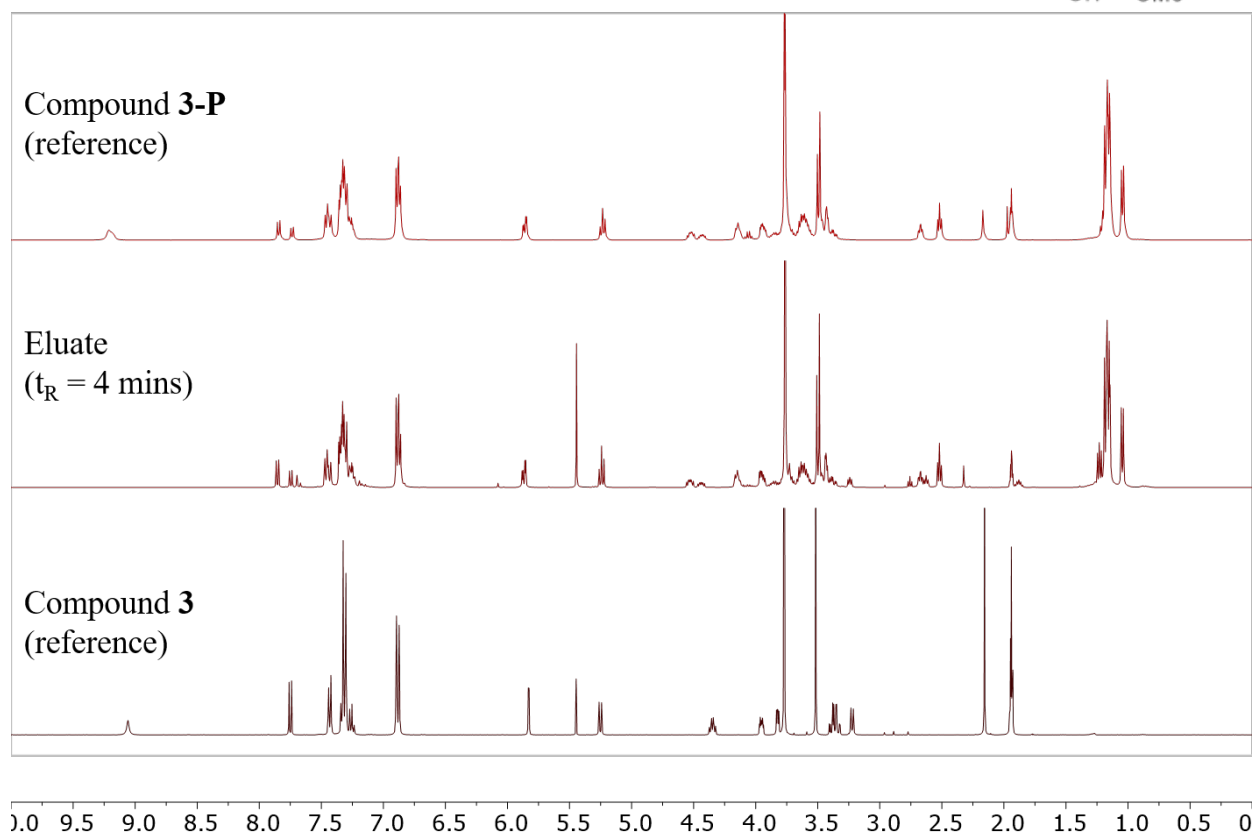

Compound **3**,  $^{31}\text{P}$  NMR ( $\text{CD}_3\text{CN}$ ), eluate

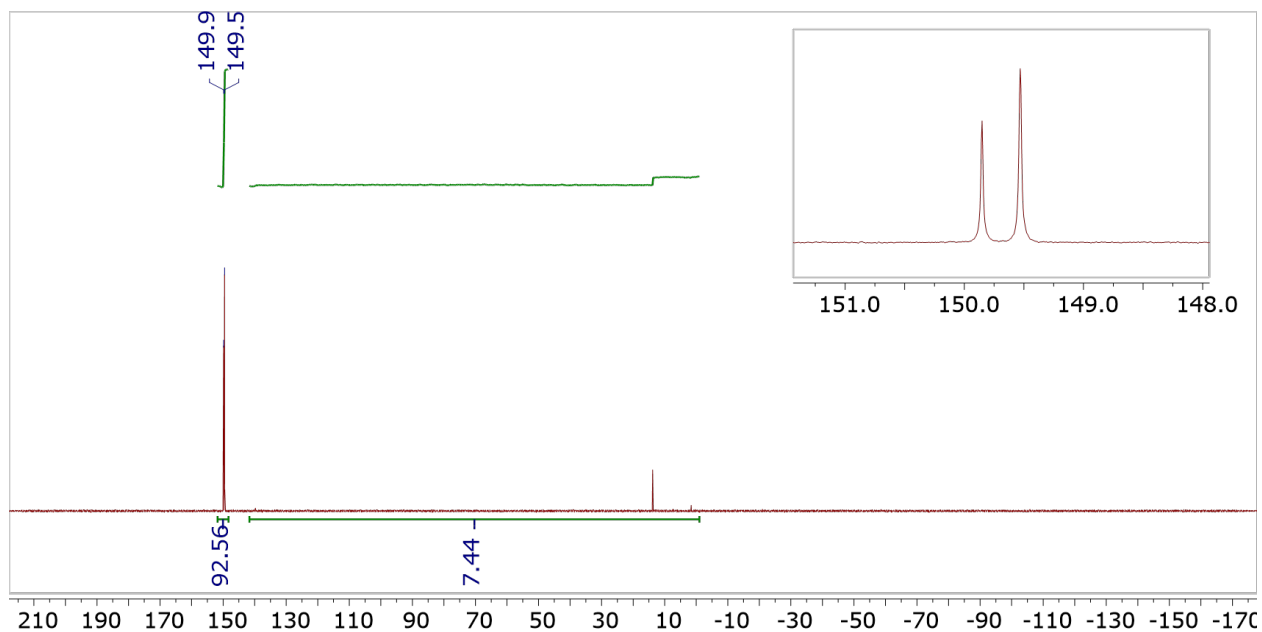

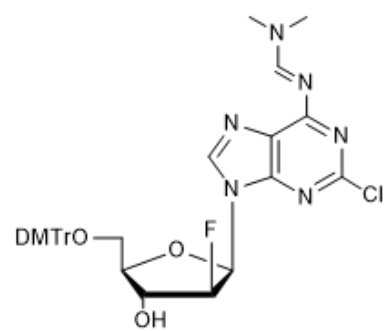

Compound 4,  $^1\text{H}$  NMR ( $\text{CD}_3\text{CN}$ )

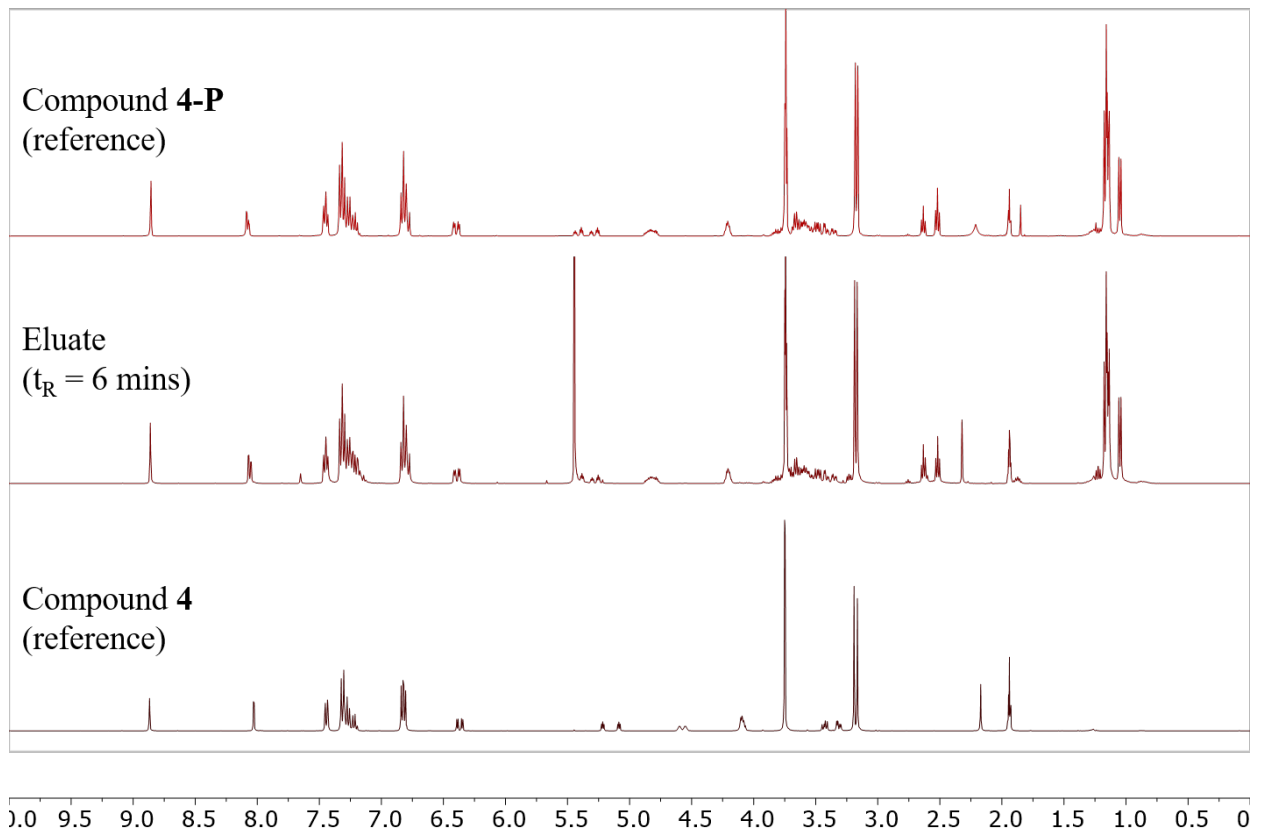

Compound 4,  $^{31}\text{P}$  NMR ( $\text{CD}_3\text{CN}$ ), eluate

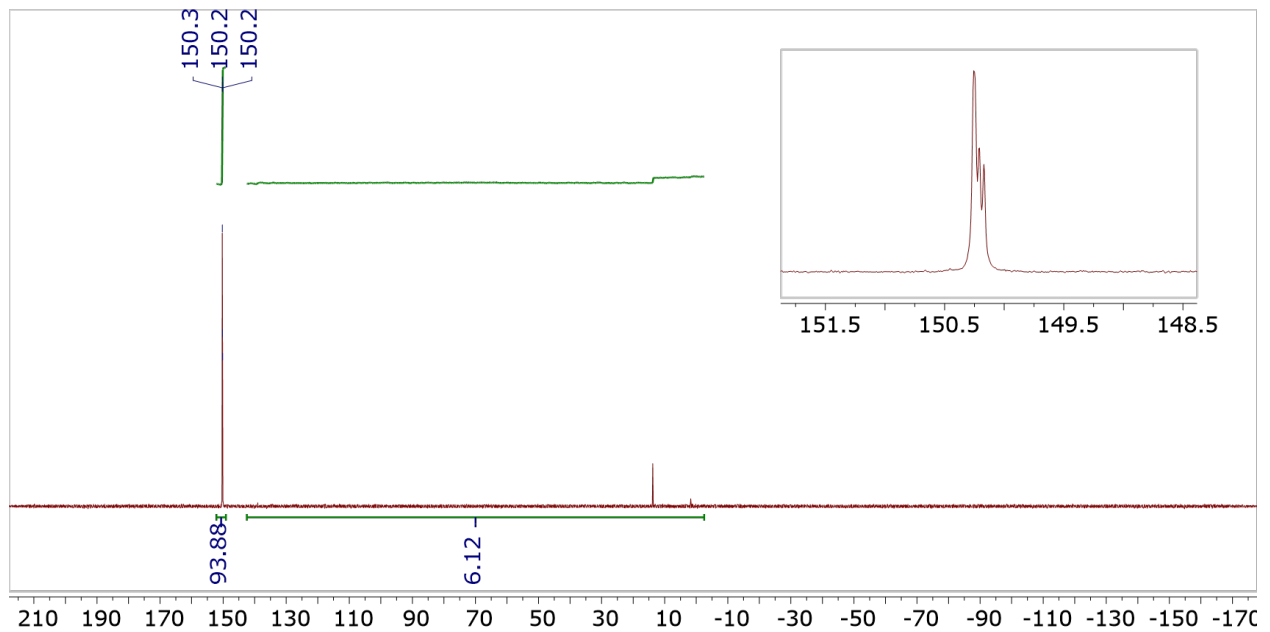

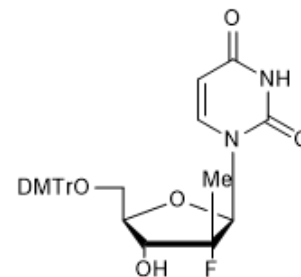

Compound **5**,  $^1\text{H}$  NMR ( $\text{CD}_3\text{CN}$ )

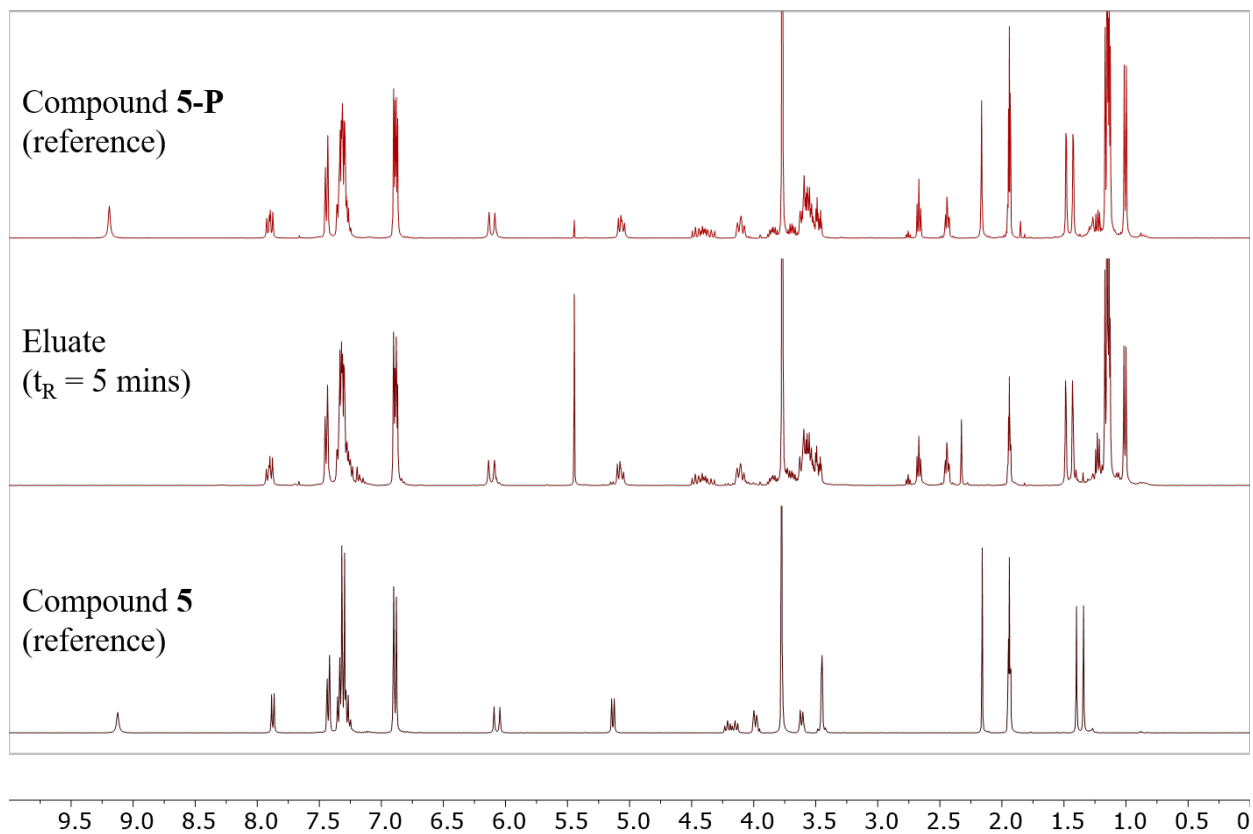

Compound **5**,  $^{31}\text{P}$  NMR ( $\text{CD}_3\text{CN}$ ), eluate

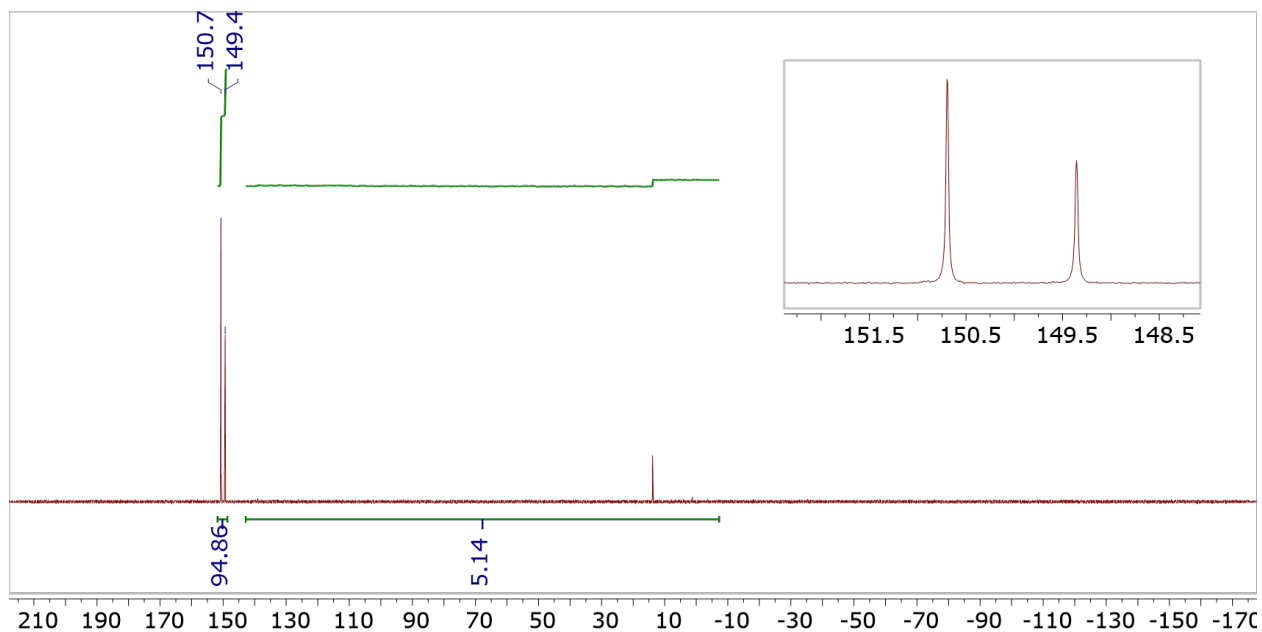

Compound **6**,  $^1\text{H}$  NMR ( $\text{CD}_3\text{CN}$ )

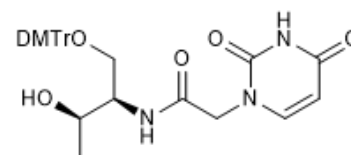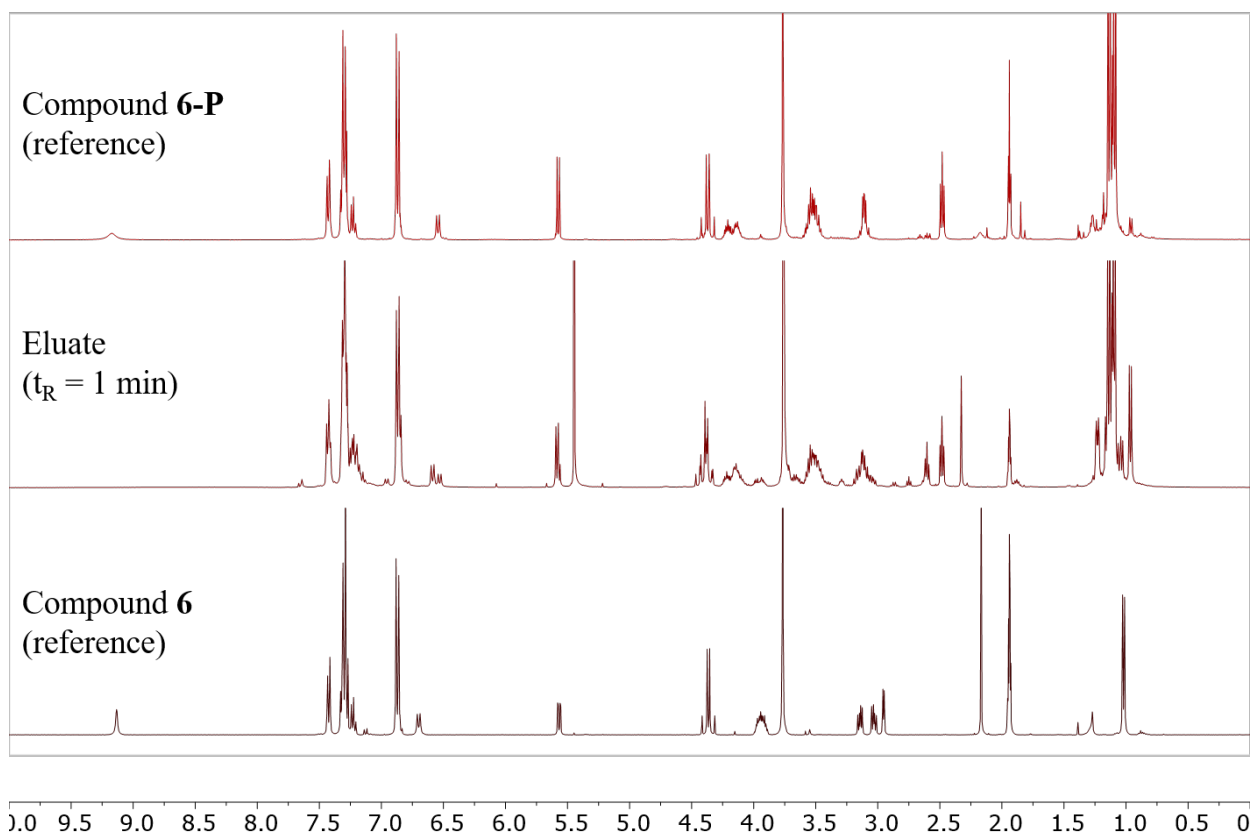

Compound **6**,  $^{31}\text{P}$  NMR ( $\text{CD}_3\text{CN}$ ), eluate

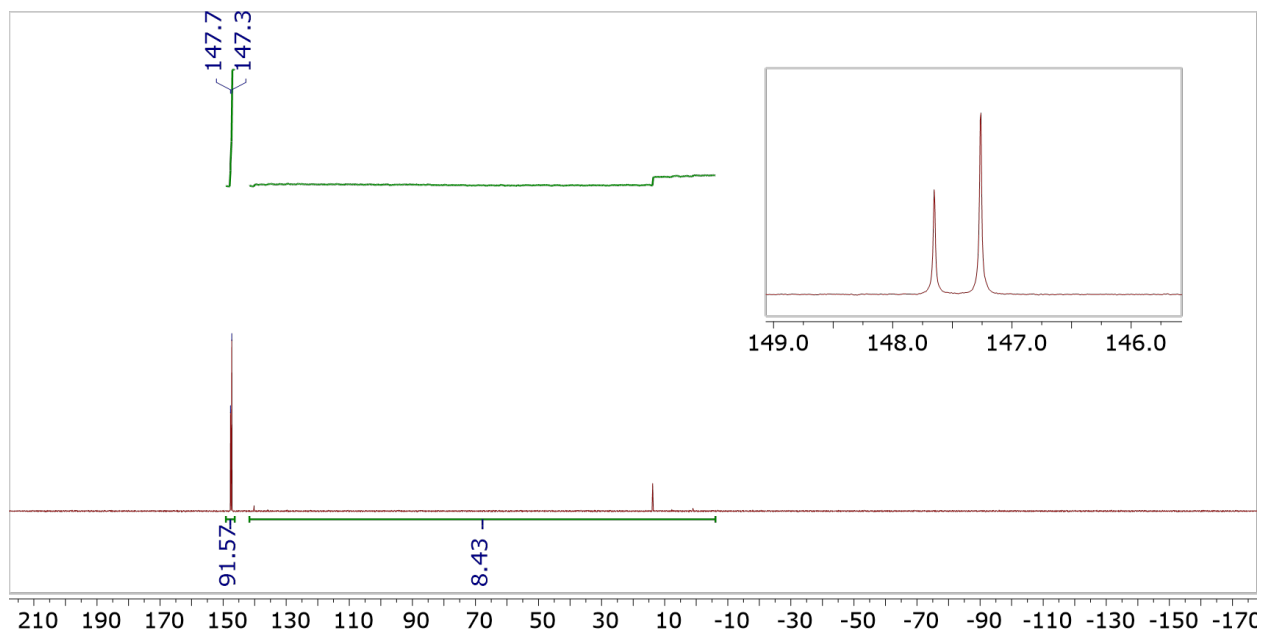



Compound 7,  $^1\text{H}$  NMR ( $\text{CD}_3\text{CN}$ )

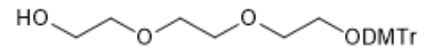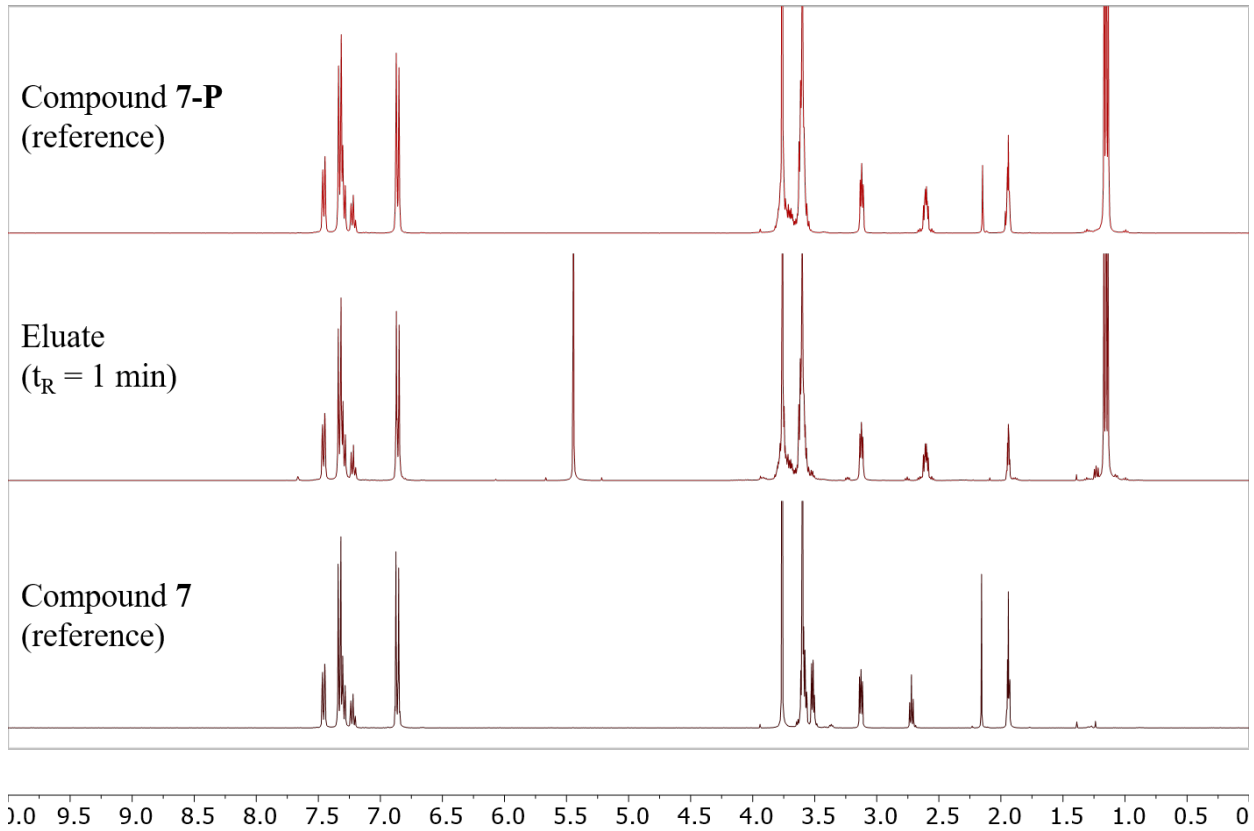

Compound 7,  $^{31}\text{P}$  NMR ( $\text{CD}_3\text{CN}$ ), eluate

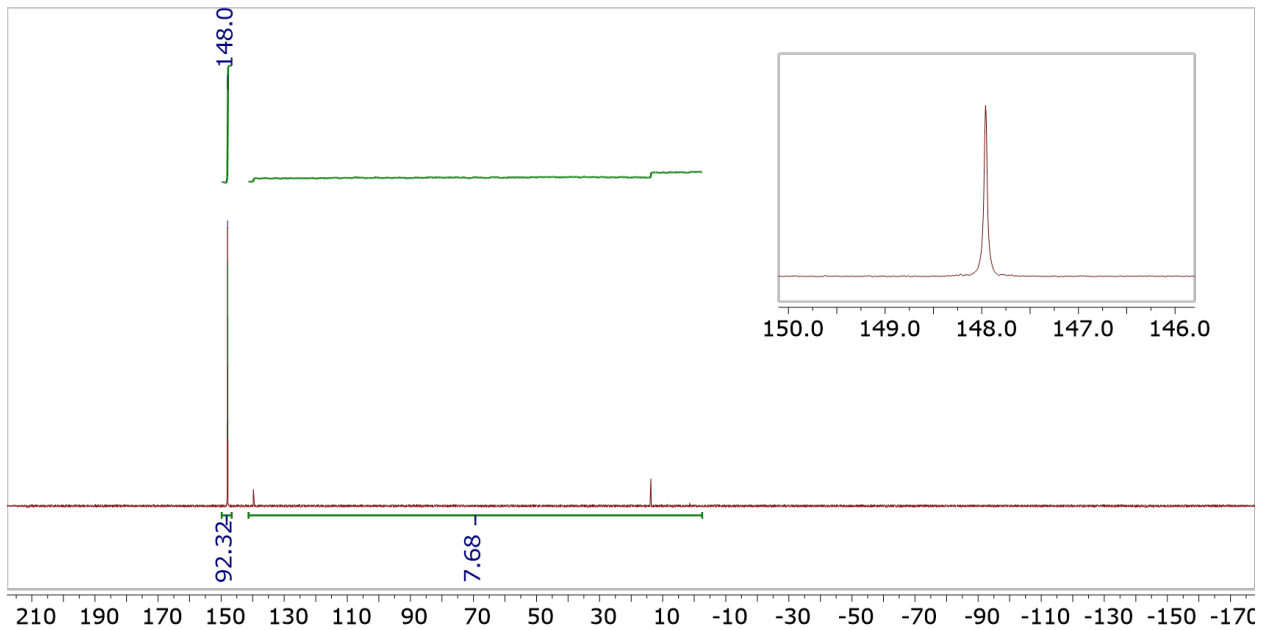

Compound **8**,  $^1\text{H}$  NMR ( $\text{CD}_3\text{CN}$ )

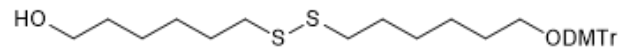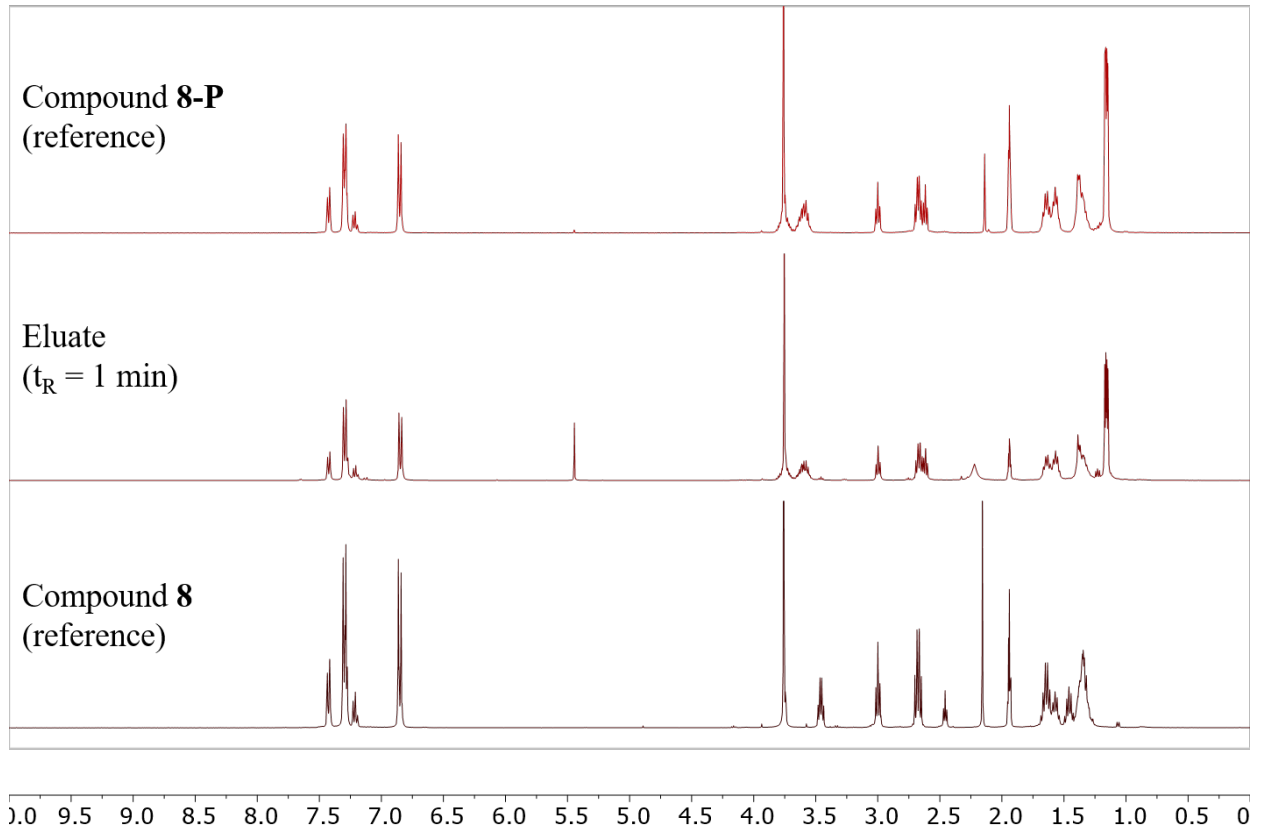

Compound **8**,  $^{31}\text{P}$  NMR ( $\text{CD}_3\text{CN}$ ), eluate

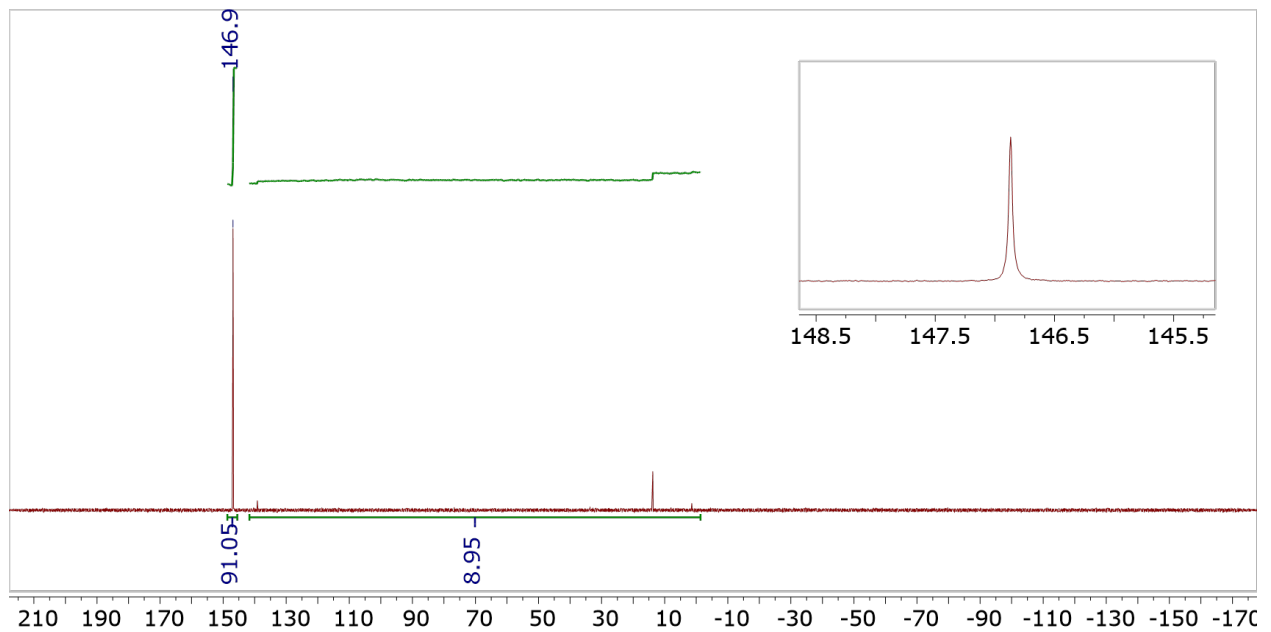

Compound **9**,  $^1\text{H}$  NMR ( $\text{CD}_3\text{CN}$ )

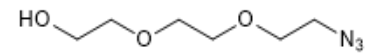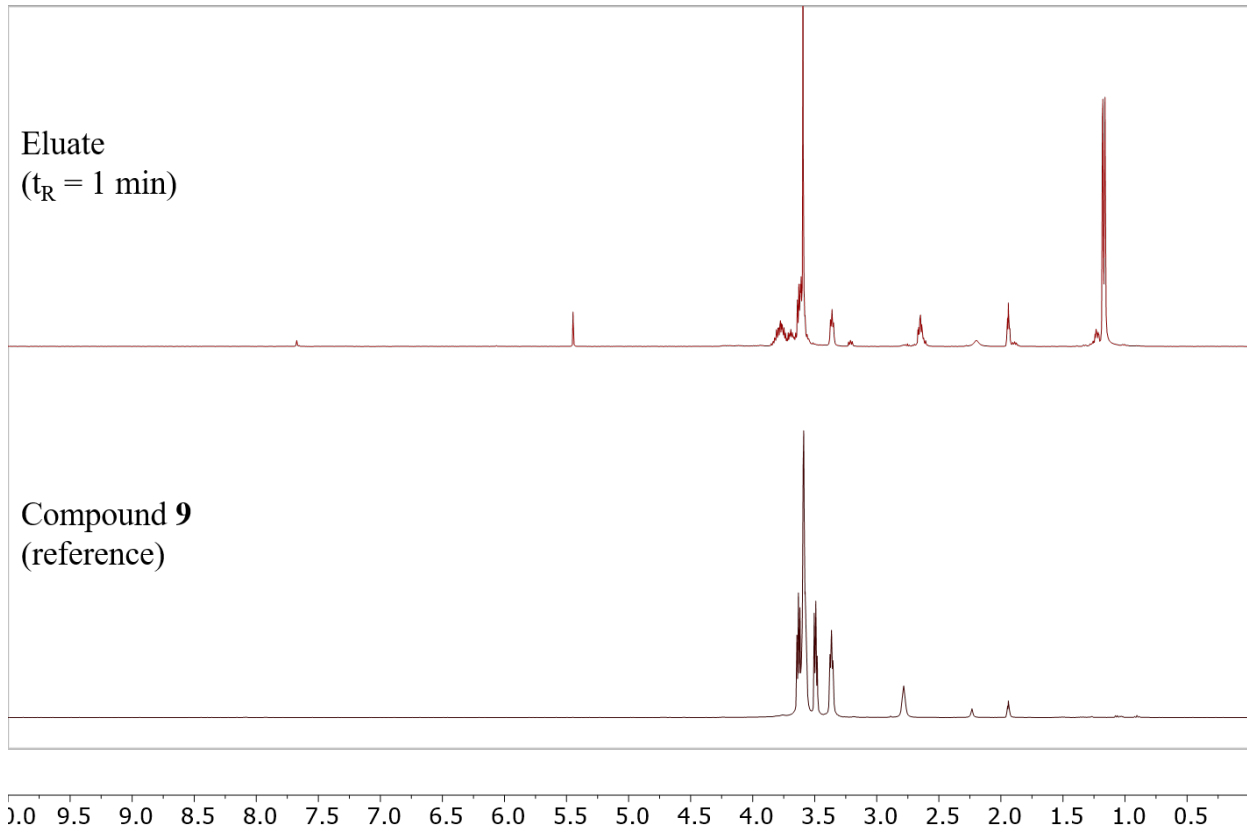

Compound **9**,  $^{31}\text{P}$  NMR ( $\text{CD}_3\text{CN}$ ), eluate

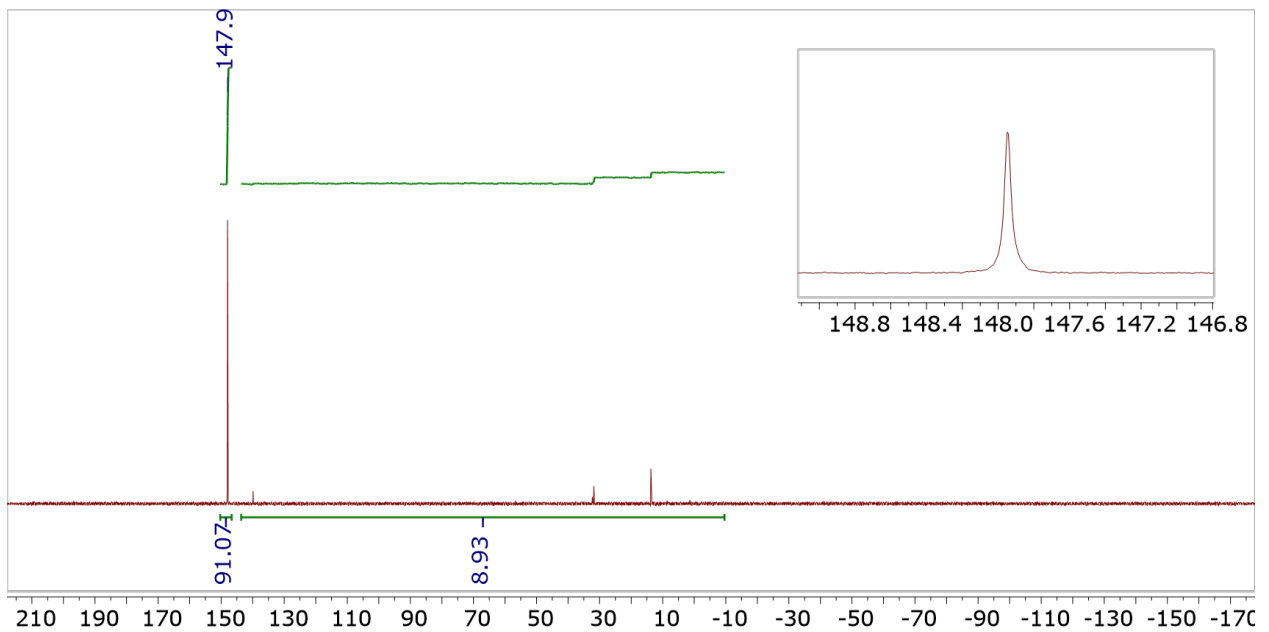

## Supplementary References

1. Thomson, C. G. et al. Development of autotaxin inhibitors: A series of zinc binding triazoles, *Bioorg. Med. Chem. Lett.*, **28**, 2279-2284 (2018).
2. Chernyshev, V. M., Chernysheva, A. V., Taranushich, V. A. Optimization of the Synthesis of 5-Amino-1,2,4-triazol-3-ylacetic Acid and Bis(5-amino-1,2,4-triazol-3-yl)methane, *Russ. J. Appl. Chem.*, **82**, 276-281 (2009).
3. Thottempudi, V., Shreeve, J. M. Synthesis and Promising Properties of a New Family of High-Density Energetic Salts of 5-Nitro-3-trinitromethyl-1H-1,2,4-triazole and 5,5'-Bis(trinitromethyl)-3,3'-azo-1H-1,2,4-triazole, *J. Am. Chem. Soc.*, **133**, 19982-19992 (2011).
4. Nguyen, T. J. D., Manuguerra, I., Kumar, V., Gothelf, K. V. Toehold-Mediated Strand Displacement in a Triplex Forming Nucleic Acid Clamp for Reversible Regulation of Polymerase Activity and Protein Expression, *Chem. Eur. J.*, **25**, 12303-12307 (2019).
